# Supplementary material for: Synthesis and Optical Properties of Near-Infrared meso-Phenyl-Substituted Symmetric Heptamethine Cyanine Dyes
Source: PubMed Central journal article supplement (PMC6017188; doi:10.3390/molecules23020226), 2018-01-24

**Synthesis and optical properties of heptamethine cyanine dyes containing a phenyl ring at  
the *meso*-position.**

Andrew Levitz<sup>#</sup>, Fahad Marmarchi<sup>#</sup>, and Maged Henary<sup>\*</sup>

Department of Chemistry, Georgia State University, Atlanta, GA 30302, USA

<sup>\*</sup>To whom correspondence should be addressed. <sup>#</sup>These authors contributed equally to this work.

**\*Corresponding Author:**

Maged Henary, Ph.D.

100 Piedmont Ave. #315

Atlanta, GA 30303

Office: 404-413-5566; Fax: 404-413-5505

Email: mhenary1@gsu.edu

**Supplemental Information**

**Table of content:**

<sup>1</sup>H and <sup>13</sup>C NMR spectra of the dyes synthesized in this study

Absorbance and fluorescence spectra of the of the dyes synthesized in this study

Beer-Lambert plots of the of the dyes synthesized in this study

HSA binding spectra of 6k

Mass spectra of the dyes synthesized in this study

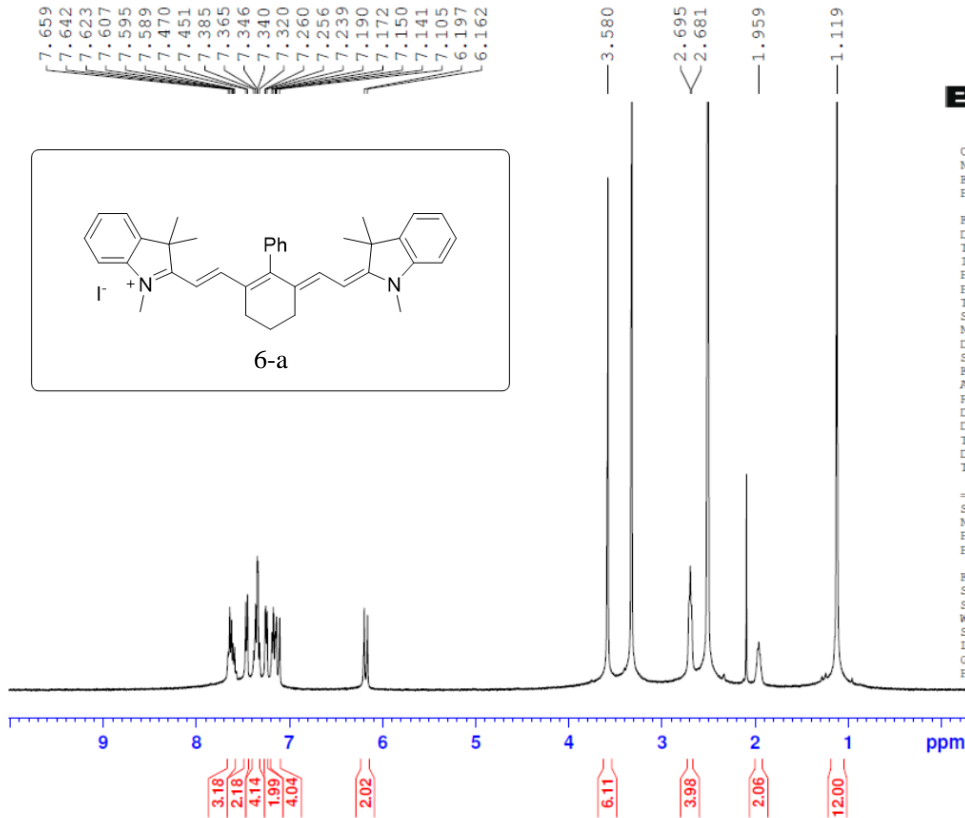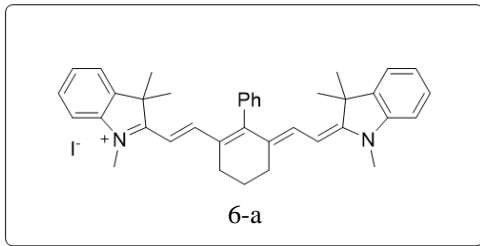

AL\_167\_DMSO\_1H

**BRUKER**

Current Data Parameters  
 NAME AL\_167\_DMSO\_1H  
 EXPNO 1  
 PROCNO 1

F2 - Acquisition Parameters  
 Date\_ 20160119  
 Time 15.26  
 INSTRUM spect  
 PROBHD 5 mm PABBO BB-  
 PULPROG zg30  
 TD 65536  
 SOLVENT DMSO  
 NS 19  
 DS 2  
 SWH 8012.820 Hz  
 FIDRES 0.122266 Hz  
 AQ 4.0894465 sec  
 RG 203  
 DW 62.400 usec  
 DE 6.50 usec  
 TE 298.0 K  
 D1 1.00000000 sec  
 TD0 1

==== CHANNEL f1 =====  
 SF01 400.1424710 MHz  
 NUC1 1H  
 P1 13.55 usec  
 PLW1 16.00000000 W

F2 - Processing parameters  
 SI 65536  
 SF 400.1400000 MHz  
 WDW EM  
 SSB 0  
 LB 0.30 Hz  
 GB 0  
 PC 1.00

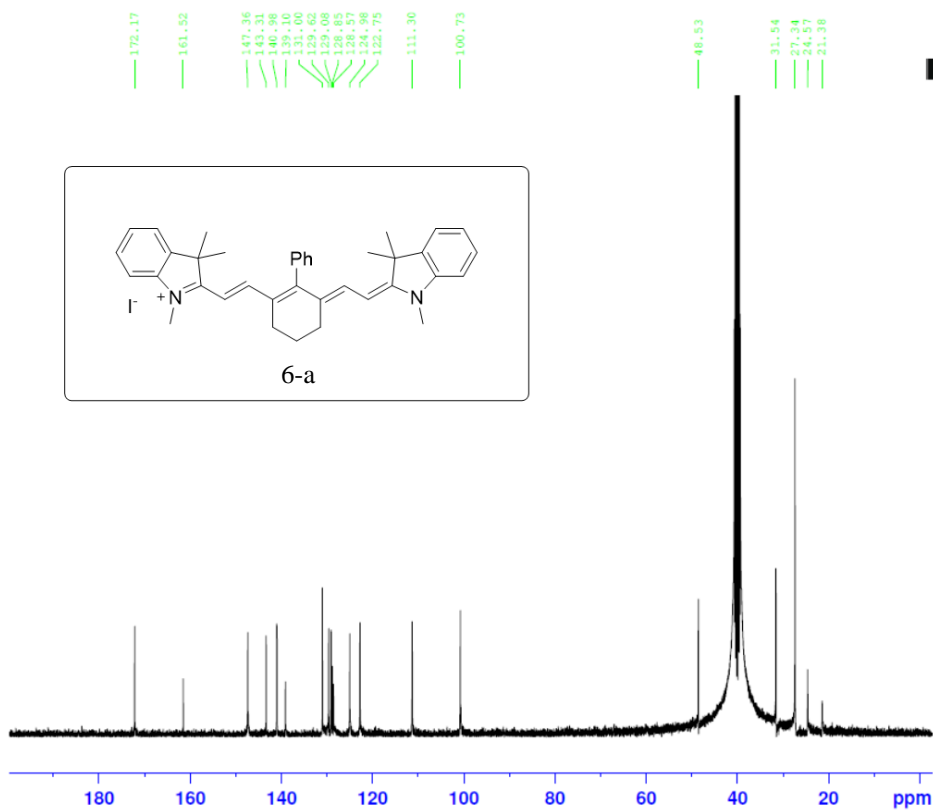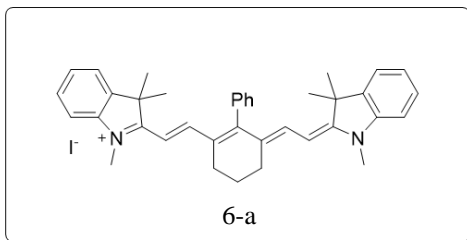

AL\_167\_DMSO\_13C

**BRUKER**

Current Data Parameters  
 NAME AL\_167\_DMSO\_13C  
 EXPNO 1  
 PROCNO 1

F2 - Acquisition Parameters  
 Date\_ 20160205  
 Time 23.53  
 INSTRUM spect  
 PROBHD 5 mm PABBO BB-  
 PULPROG jmod  
 TD 65536  
 SOLVENT DMSO  
 NS 11153  
 DS 4  
 SWH 24038.461 Hz  
 FIDRES 0.366798 Hz  
 AQ 1.3631488 sec  
 RG 203  
 DW 20.800 usec  
 DE 6.50 usec  
 TE 298.0 K  
 CNST2 145.0000000  
 CNST11 1.0000000  
 D1 2.00000000 sec  
 D20 0.00689655 sec  
 TD0 1

==== CHANNEL f1 =====  
 SF01 100.6253446 MHz  
 NUC1 13C  
 P1 9.00 usec  
 P2 18.00 usec  
 PLW1 62.00000000 W

==== CHANNEL f2 =====  
 SF02 400.1416006 MHz  
 NUC2 1H  
 CPDPRG[2] waltz16  
 PCPD2 90.00 usec  
 PLW2 16.00000000 W  
 PLW12 0.36267000 W

F2 - Processing parameters  
 SI 32768  
 SF 100.6152830 MHz  
 WDW EM  
 SSB 0  
 LB 1.00 Hz  
 GB 0  
 PC 1.40

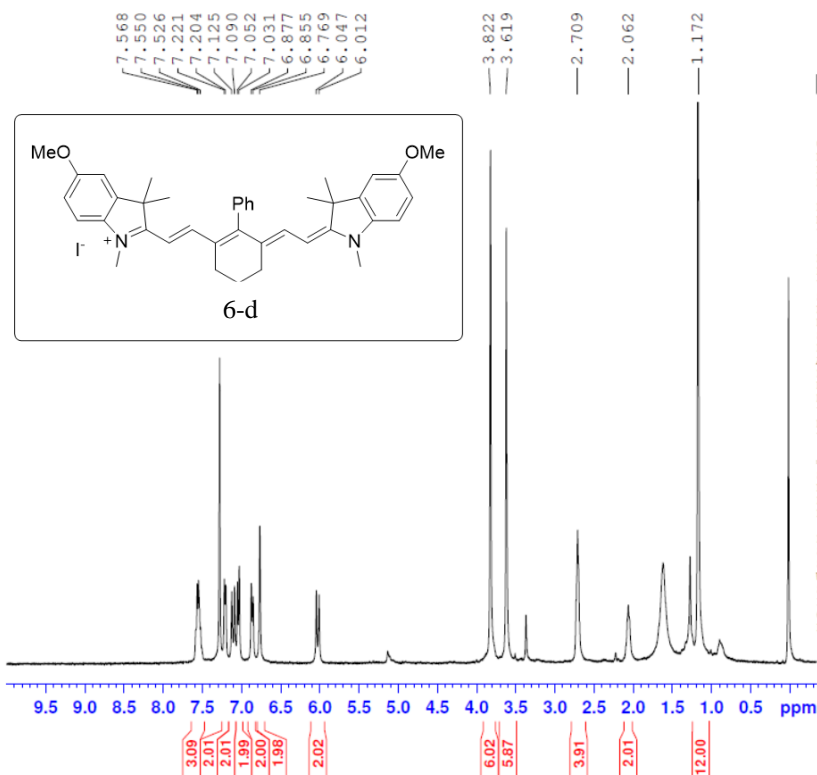

AL\_190\_CDC13\_1H

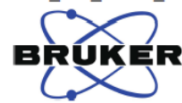

Current Data Parameters  
 NAME AL\_190\_CDC13\_1H  
 EXPNO 1  
 PROCNO 1

F2 - Acquisition Parameters  
 Date\_ 20160420  
 Time 14.12  
 INSTRUM spect  
 PROBHD 5 mm PABBO BB-  
 PULPROG zg30  
 TD 65536  
 SOLVENT CDC13  
 NS 27  
 DS 2  
 SWH 8012.820 Hz  
 FIDRES 0.122266 Hz  
 AQ 4.0894465 sec  
 RG 203  
 DW 62.400 usec  
 DE 6.50 usec  
 TE 298.0 K  
 D1 1.00000000 sec  
 TD0 1

==== CHANNEL f1 =====  
 SF01 400.1424710 MHz  
 NUC1 1H  
 P1 13.55 usec  
 PLW1 16.00000000 W

F2 - Processing parameters  
 SI 65536  
 SF 400.1400000 MHz  
 WDW EM  
 SSB 0  
 LB 0 0.30 Hz  
 GB 0  
 PC 1.00

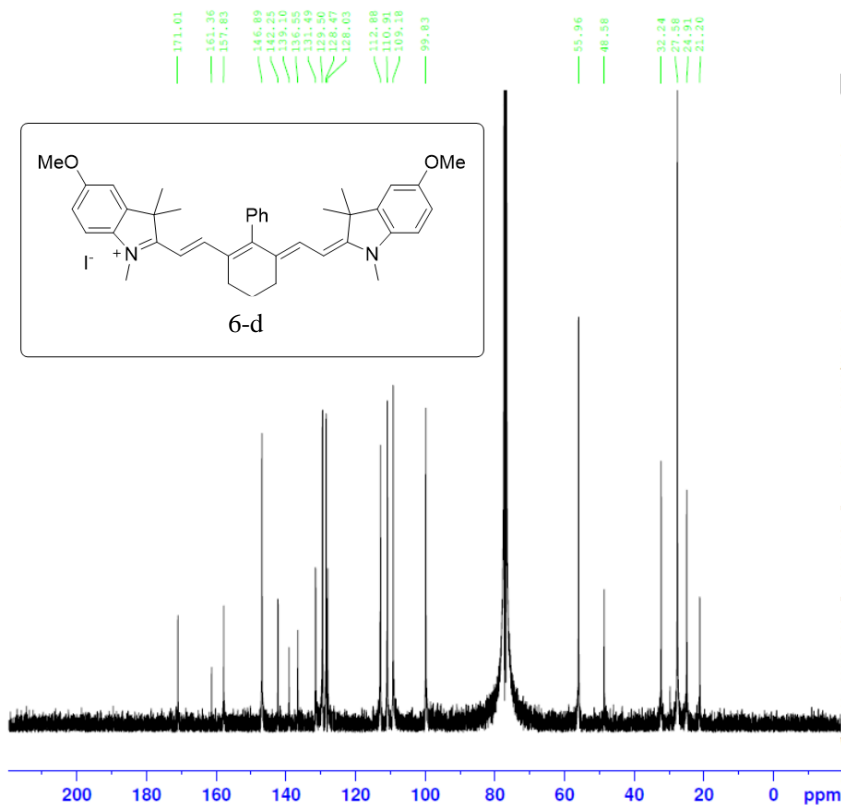

AL\_190\_CDC13\_13C

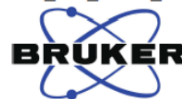

Current Data Parameters  
 NAME AL\_190\_CDC13\_13C  
 EXPNO 1  
 PROCNO 1

F2 - Acquisition Parameters  
 Date\_ 20160424  
 Time 23.29  
 INSTRUM spect  
 PROBHD 5 mm PABBO BB-  
 PULPROG jmod  
 TD 65536  
 SOLVENT CDC13  
 NS 10074  
 DS 4  
 SWH 24038.461 Hz  
 FIDRES 0.366798 Hz  
 AQ 1.3631488 sec  
 RG 203  
 DW 20.800 usec  
 DE 6.50 usec  
 TE 298.1 K  
 CNST2 145.0000000  
 CNST11 1.0000000  
 D1 2.00000000 sec  
 D20 0.00689655 sec  
 TD0 1

==== CHANNEL f1 =====  
 SF01 100.6253446 MHz  
 NUC1 13C  
 P1 9.00 usec  
 P2 18.00 usec  
 PLW1 62.00000000 W

==== CHANNEL f2 =====  
 SF02 400.1416006 MHz  
 NUC2 1H  
 CPDPRG2 waltz16  
 PCPD2 90.00 usec  
 PLW2 16.00000000 W  
 PLW12 0.36267000 W

F2 - Processing parameters  
 SI 32768  
 SF 100.6152830 MHz  
 WDW EM  
 SSB 0  
 LB 1.00 Hz  
 GB 0  
 PC 1.40

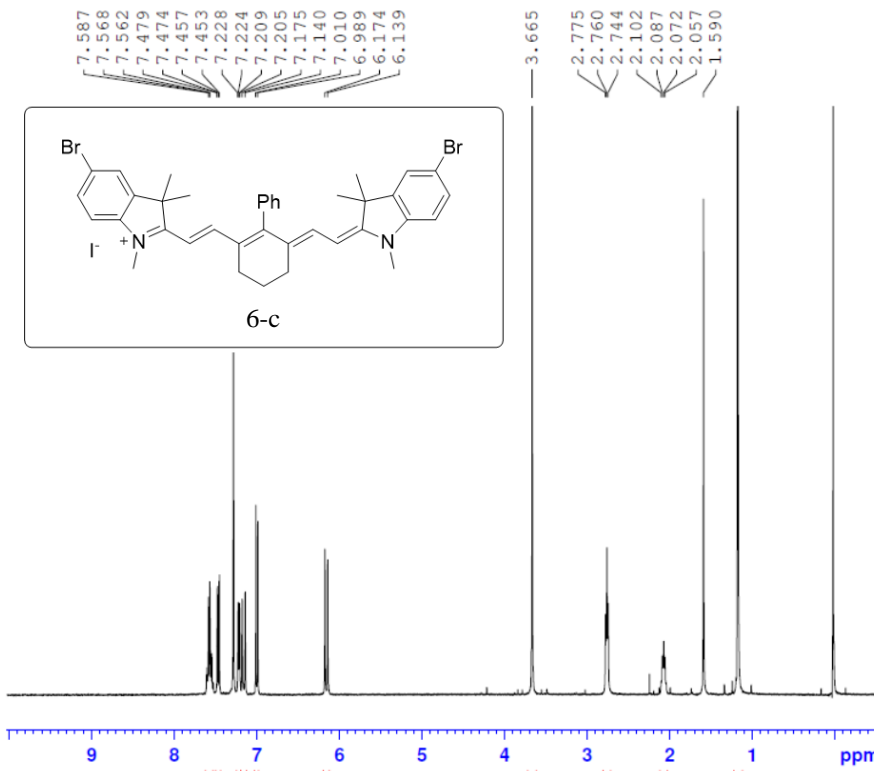

AL\_181\_CDC13\_1H

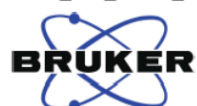

Current Data Parameters  
 NAME AL\_181\_cdc13\_1H  
 EXPNO 1  
 PROCNO 1

F2 - Acquisition Parameters  
 Date\_ 20160301  
 Time 13.45  
 INSTRUM spect  
 PROBHD 5 mm PABBO BB-  
 PULPROG zg30  
 ID 65536  
 SOLVENT CDCl3  
 NS 9  
 DS 2  
 SWH 8012.820 Hz  
 FIDRES 0.122266 Hz  
 AQ 4.0894465 sec  
 RG 203  
 DW 62.400 usec  
 DE 6.50 usec  
 TE 298.0 K  
 D1 1.00000000 sec  
 TD0 1

===== CHANNEL f1 =====  
 SFO1 400.1424710 MHz  
 NUC1 1H  
 P1 13.55 usec  
 PLW1 16.00000000 W

F2 - Processing parameters  
 SI 65536  
 SF 400.1400000 MHz  
 WDW EM  
 SSB 0  
 LB 0.30 Hz  
 GB 0  
 PC 1.00

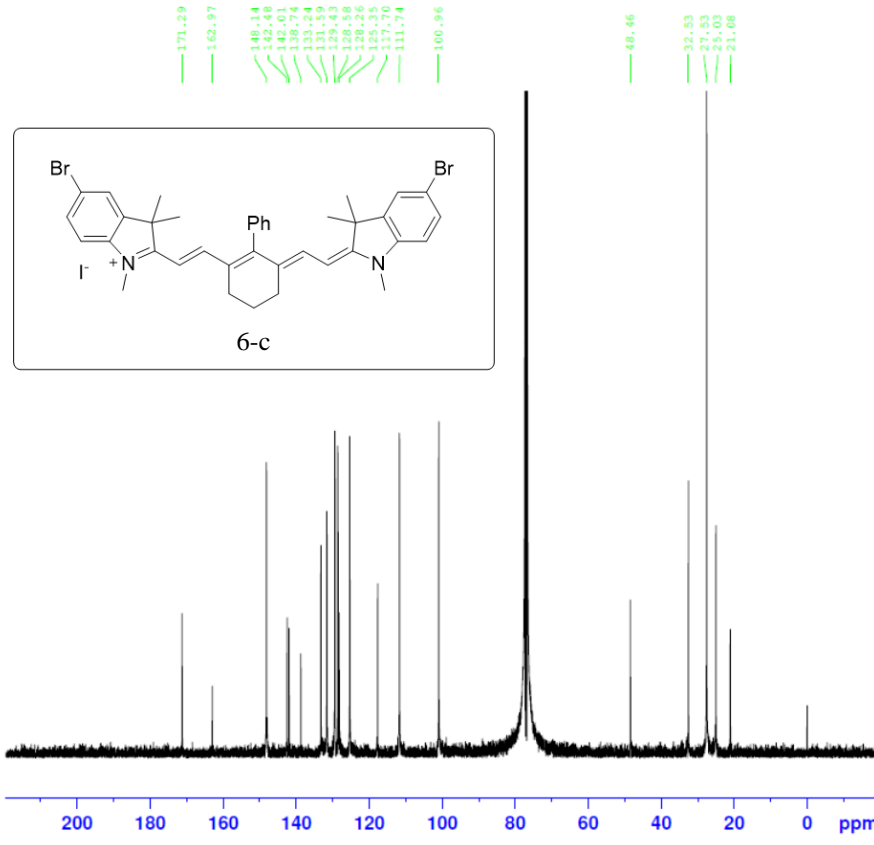

AL\_181\_CDC13\_13C

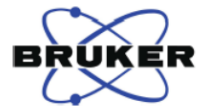

Current Data Parameters  
 NAME AL\_181\_cdc13\_13C  
 EXPNO 1  
 PROCNO 1

F2 - Acquisition Parameters  
 Date\_ 20160306  
 Time 22.44  
 INSTRUM spect  
 PROBHD 5 mm PABBO BB-  
 PULPROG jmod  
 TD 65536  
 SOLVENT CDCl3  
 NS 11500  
 DS 4  
 SWH 24038.461 Hz  
 FIDRES 0.366798 Hz  
 AQ 1.3631488 sec  
 RG 203  
 DW 20.800 usec  
 DE 6.50 usec  
 TE 298.1 K  
 CNST2 145.0000000  
 CNST11 1.0000000  
 D1 2.00000000 sec  
 D20 0.00689655 sec  
 TD0 1

===== CHANNEL f1 =====  
 SFO1 100.6253446 MHz  
 NUC1 13C  
 P1 9.00 usec  
 P2 18.00 usec  
 PLW1 62.00000000 W

===== CHANNEL f2 =====  
 SFO2 400.1416006 MHz  
 NUC2 1H  
 CPDPRG2 waltz16  
 PCPD2 90.00 usec  
 PLW2 16.00000000 W  
 PLW12 0.36267000 W

F2 - Processing parameters  
 SI 32768  
 SF 100.6152830 MHz  
 WDW EM  
 SSB 0  
 LB 1.00 Hz  
 GB 0  
 PC 1.40

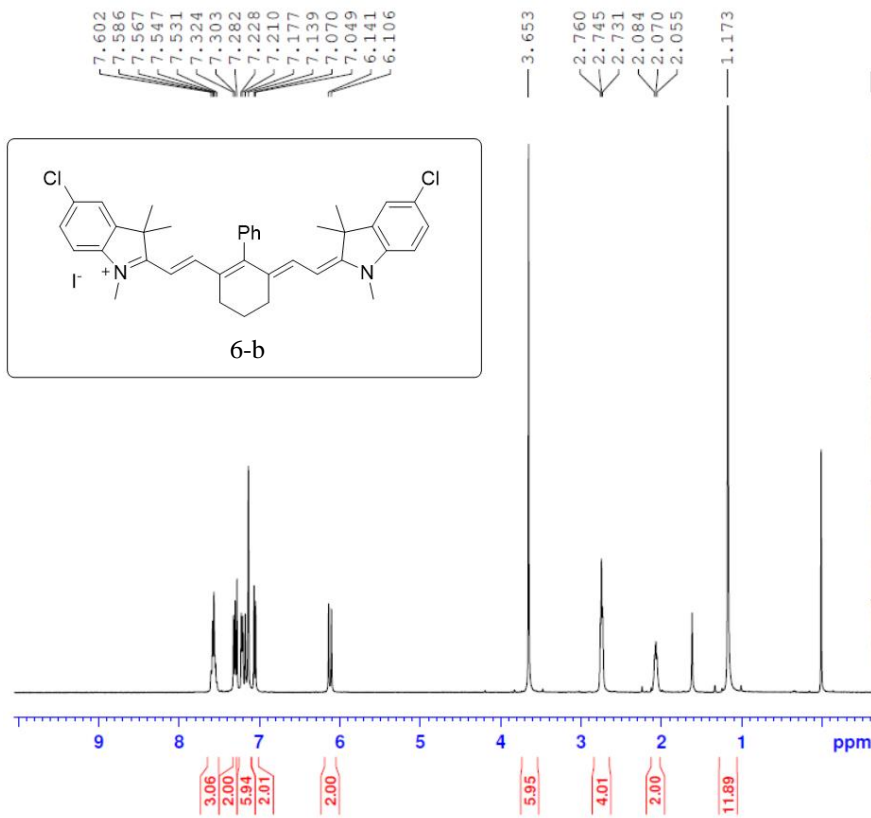

AL\_188\_CDC13\_1H

**BRUKER**

Current Data Parameters  
 NAME AL\_188\_CDC13\_1H  
 EXPNO 2  
 PROCNO 2

F2 - Acquisition Parameters  
 Date\_ 20160404  
 Time\_ 15.09  
 INSTRUM spect  
 PROBHD 5 mm PABBO BB-  
 PULPROG zg30  
 TD 65536  
 SOLVENT CDC13  
 NS 16  
 DS 2  
 SWH 8012.820 Hz  
 FIDRES 0.122266 Hz  
 AQ 4.0894465 sec  
 RG 161  
 DW 62.400 usec  
 DE 6.50 usec  
 TE 298.0 K  
 D1 1.00000000 sec  
 TDO 1

==== CHANNEL f1 =====  
 SFO1 400.1424710 MHz  
 NUC1 1H  
 P1 13.55 usec  
 PLW1 16.00000000 W

F2 - Processing parameters  
 SI 65536  
 SF 400.1400000 MHz  
 WDW EM  
 SSB 0  
 LB 0.30 Hz  
 GB 0  
 PC 1.00

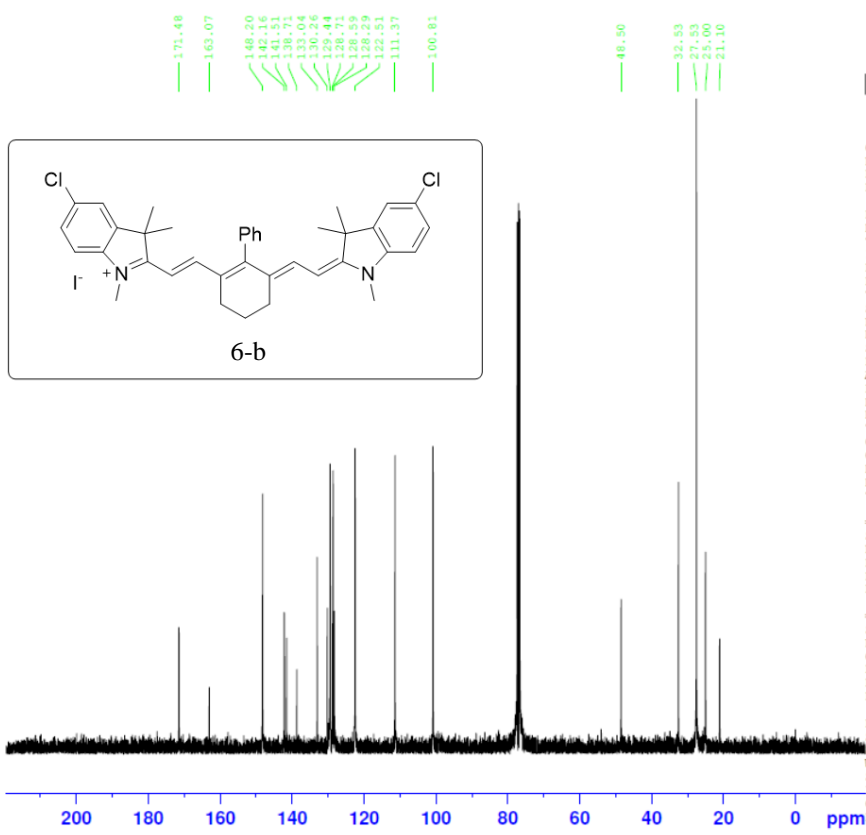

AL\_188\_CDC13\_13C

**BRUKER**

Current Data Parameters  
 NAME AL\_188\_CDC13\_13C  
 EXPNO 1  
 PROCNO 1

F2 - Acquisition Parameters  
 Date\_ 20160404  
 Time\_ 15.39  
 INSTRUM spect  
 PROBHD 5 mm PABBO BB-  
 PULPROG jmod  
 TD 65536  
 SOLVENT CDC13  
 NS 679  
 DS 4  
 SWH 24038.461 Hz  
 FIDRES 0.366798 Hz  
 AQ 1.3631488 sec  
 RG 203  
 DW 20.800 usec  
 DE 6.50 usec  
 TE 298.2 K  
 CNST2 145.0000000  
 CNST11 1.0000000  
 D1 2.00000000 sec  
 D20 0.00689655 sec  
 TDO 1

==== CHANNEL f1 =====  
 SFO1 100.6253446 MHz  
 NUC1 13C  
 P1 9.00 usec  
 P2 18.00 usec  
 PLW1 62.00000000 W

==== CHANNEL f2 =====  
 SFO2 400.1416006 MHz  
 NUC2 1H  
 CPDPRG[2] waltz16  
 PCPD2 90.00 usec  
 PLW2 16.00000000 W  
 PLW12 0.36267000 W

F2 - Processing parameters  
 SI 32768  
 SF 100.6152830 MHz  
 WDW EM  
 SSB 0  
 LB 1.00 Hz  
 GB 0  
 PC 1.40

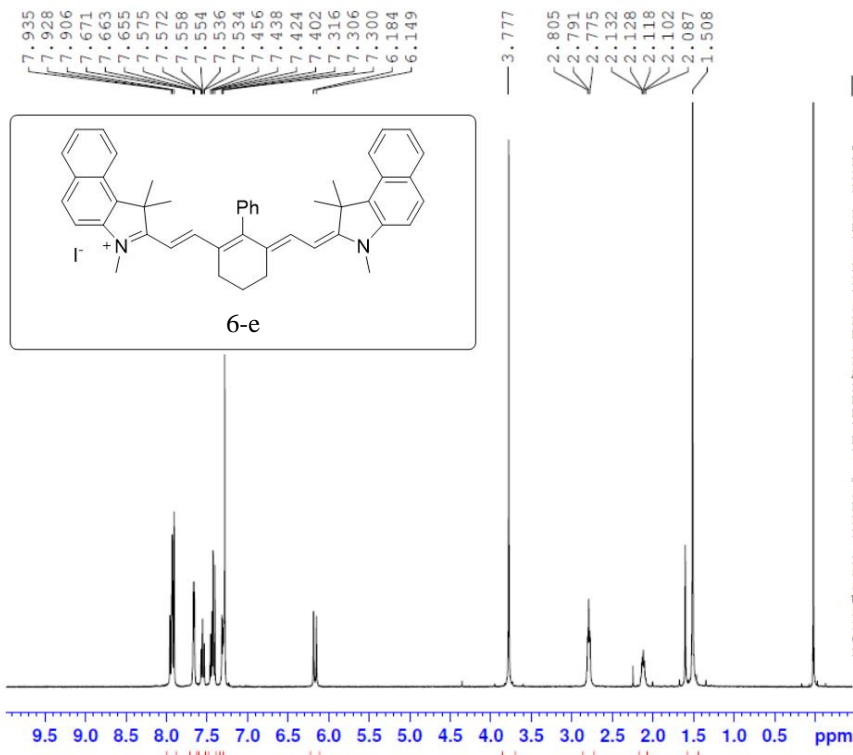

AL\_184\_CDC13\_1H

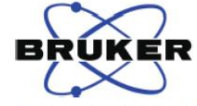

Current Data Parameters  
 NAME AL\_184\_CDC13\_1H  
 EXPNO 1  
 PROCNO 1

F2 - Acquisition Parameters  
 Date\_ 20160304  
 Time 14:18  
 INSTRUM spect  
 PROBHD 5 mm PABBO BB-  
 PULPROG zg30  
 TD 65536  
 SOLVENT CDC13  
 NS 7  
 DS 2  
 SWH 8012.820 Hz  
 FIDRES 0.122266 Hz  
 AQ 4.0894465 sec  
 RG 203  
 EW 62.400 usec  
 DE 6.50 usec  
 TE 298.0 K  
 D1 1.00000000 sec  
 TD0 1

===== CHANNEL f1 =====  
 SFO1 400.1424710 MHz  
 NUC1 1H  
 P1 13.55 usec  
 PLW1 16.00000000 W

F2 - Processing parameters  
 SI 65536  
 SF 400.1400000 MHz  
 WDW EM  
 SSB 0  
 LB 0.30 Hz  
 GB 0  
 PC 1.00

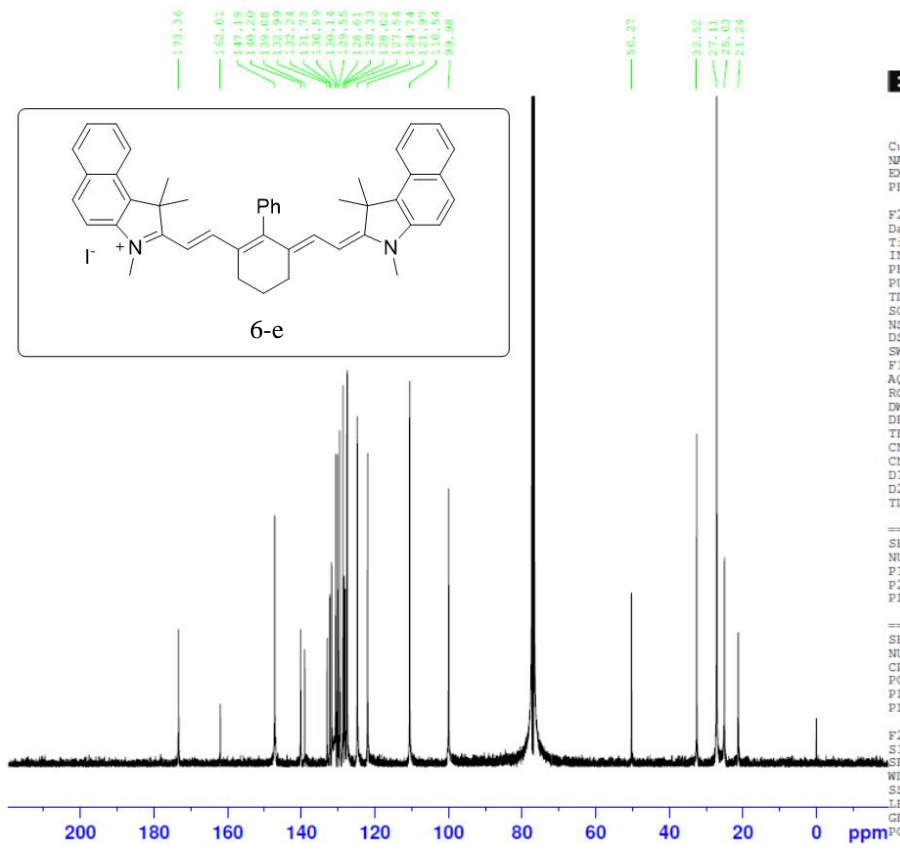

AL\_184\_CDC13\_13C

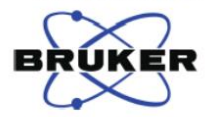

Current Data Parameters  
 NAME AL\_184\_CDC13\_13C  
 EXPNO 1  
 PROCNO 1

F2 - Acquisition Parameters  
 Date\_ 20160306  
 Time 0:09  
 INSTRUM spect  
 PROBHD 5 mm PABBO BB-  
 PULPROG jmod  
 TD 65536  
 SOLVENT CDC13  
 NS 12500  
 DS 4  
 SWH 24038.461 Hz  
 FIDRES 0.366798 Hz  
 AQ 1.3631488 sec  
 RG 203  
 DW 20.800 usec  
 DE 6.50 usec  
 TE 298.2 K  
 CNST2 145.0000000  
 CNST11 1.0000000  
 D1 2.00000000 sec  
 D20 0.00689655 sec  
 TD0 1

===== CHANNEL f1 =====  
 SFO1 100.6253446 MHz  
 NUC1 13C  
 P1 9.00 usec  
 P2 18.00 usec  
 PLW1 62.00000000 W

===== CHANNEL f2 =====  
 SFO2 400.1416006 MHz  
 NUC2 1H  
 CPDPRG2 waitz16  
 PCPD2 90.00 usec  
 PLW2 16.00000000 W  
 PLW12 0.36267000 W

F2 - Processing parameters  
 SI 32768  
 SF 100.6152830 MHz  
 WDW EM  
 SSB 0  
 LB 1.00 Hz  
 GB 0  
 PC 1.40

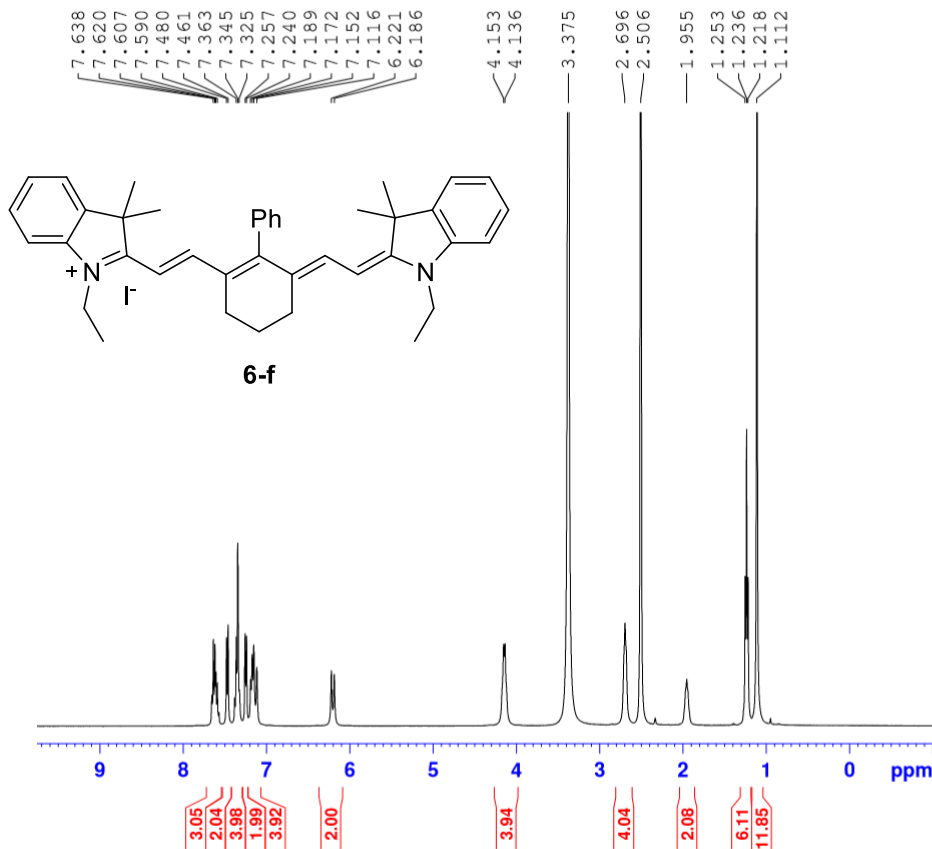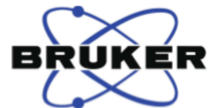

Current Data Parameters  
 NAME Ph-AC5-DMSO-1H  
 EXPNO 1  
 PROCNO 1

F2 - Acquisition Parameters  
 Date\_ 20171218  
 Time 13.21  
 INSTRUM spect  
 PROBHD 5 mm PABBO BB-  
 PULPROG zg30  
 TD 65536  
 SOLVENT DMSO  
 NS 64  
 DS 2  
 SWH 8012.820 Hz  
 FIDRES 0.122266 Hz  
 AQ 4.0894465 sec  
 RG 101  
 DW 62.400 usec  
 DE 6.50 usec  
 TE 295.6 K  
 D1 1.0000000 sec  
 TD0 1

===== CHANNEL f1 =====  
 SFO1 400.1424710 MHz  
 NUC1 1H  
 P1 13.55 usec  
 PLW1 16.0000000 W

F2 - Processing parameters  
 SI 65536  
 SF 400.1400000 MHz  
 WDW EM  
 SSB 0  
 LB 0.30 Hz  
 GB 0  
 PC 1.00

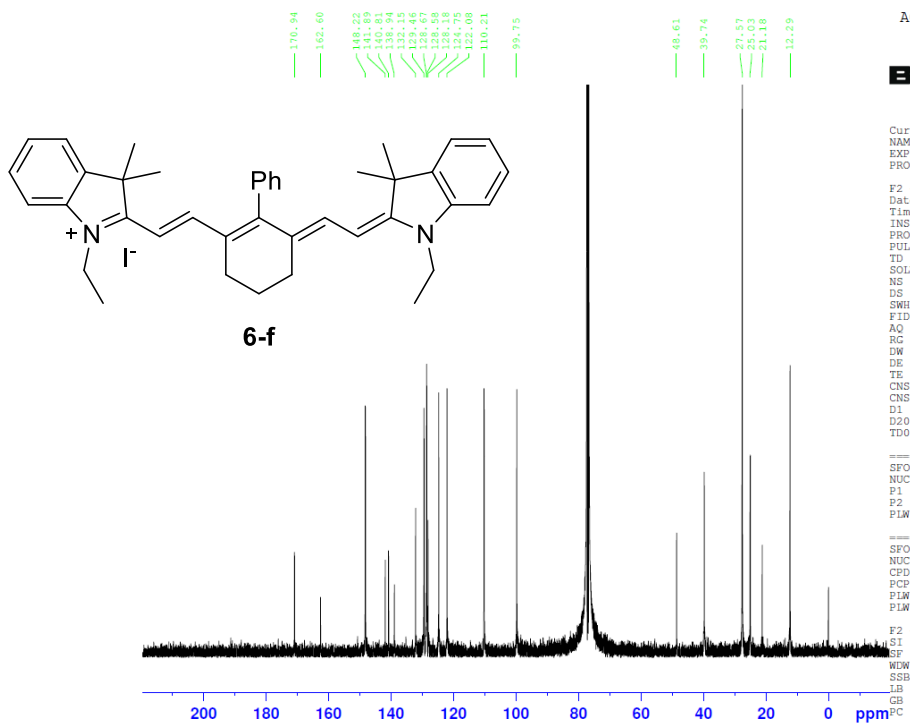

AC\_5\_CDC13\_13C

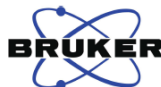

Current Data Parameters  
 NAME AC\_5\_CDC13\_13C  
 EXPNO 1  
 PROCNO 1

F2 - Acquisition Parameters  
 Date\_ 20160428  
 Time 23.28  
 INSTRUM spect  
 PROBHD 5 mm PABBO HB-  
 PULPROG jmod  
 TD 65536  
 SOLVENT CDCl3  
 NS 8750  
 DS 4  
 SWH 24038.461 Hz  
 FIDRES 0.366798 Hz  
 AQ 1.3631488 sec  
 RC 203  
 DW 20.800 usec  
 DE 6.50 usec  
 TE 298.3 K  
 CNST2 145.0000000  
 CNST11 1.0000000  
 D1 2.0000000 sec  
 D20 0.00689655 sec  
 TD0 1

===== CHANNEL f1 =====  
 SFO1 100.6253446 MHz  
 NUC1 13C  
 P1 9.00 usec  
 P2 18.00 usec  
 PLW1 62.0000000 W

===== CHANNEL f2 =====  
 SFO2 400.1416006 MHz  
 NUC2 1H  
 CPDPRG2 waltz16  
 PCPD2 90.00 usec  
 PLW2 16.0000000 W  
 PLW12 0.36267000 W

F2 - Processing parameters  
 SI 32768  
 SF 100.6152830 MHz  
 WDW EM  
 SSB 0  
 LB 1.00 Hz  
 GB 0  
 PC 1.40





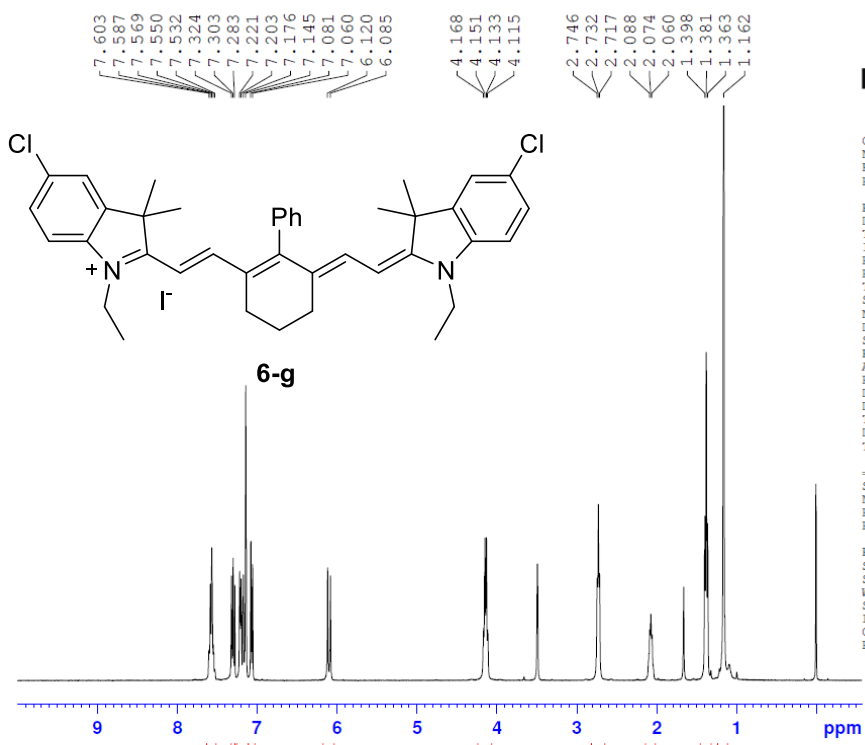

AC\_7\_CDC13\_1H

**BRUKER**

Current Data Parameters  
 NAME AC\_7\_CDC13\_1H  
 EXPNO 1  
 PROCNO 1

F2 - Acquisition Parameters  
 Date\_ 20160329  
 Time 15.06  
 INSTRUM spect  
 PROBHD 5 mm PABBO BB-  
 PULPROG zg30  
 TD 65536  
 SOLVENT CDC13  
 NS 6  
 DS 2  
 SWH 8012.820 Hz  
 FIDRES 0.122266 Hz  
 AQ 4.0894465 sec  
 RG 128  
 DW 62.400 usec  
 DE 6.50 usec  
 TE 298.0 K  
 D1 1.00000000 sec  
 TDO 1

==== CHANNEL f1 =====  
 SFO1 400.1424710 MHz  
 NUC1 1H  
 P1 13.55 usec  
 PLW1 16.00000000 W

F2 - Processing parameters  
 SI 65536  
 SF 400.1400000 MHz  
 WDW EM  
 SSB 0  
 LB 0.30 Hz  
 GB 0  
 PC 1.00

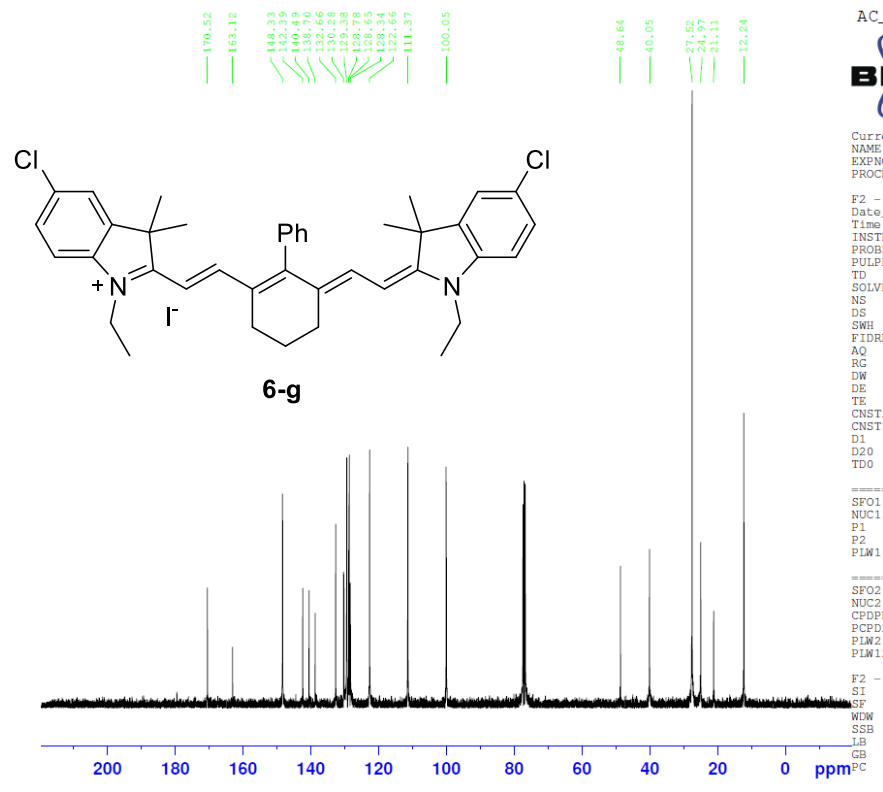

AC\_7\_CDC13\_13C

**BRUKER**

Current Data Parameters  
 NAME AC\_7\_CDC13\_13C  
 EXPNO 1  
 PROCNO 1

F2 - Acquisition Parameters  
 Date\_ 20160331  
 Time 23.37  
 INSTRUM spect  
 PROBHD 5 mm PABBO BB-  
 PULPROG jmod  
 TD 65536  
 SOLVENT CDC13  
 NS 690  
 DS 4  
 SWH 24038.461 Hz  
 FIDRES 0.366798 Hz  
 AQ 1.3631488 sec  
 RG 203  
 DW 20.800 usec  
 DE 6.50 usec  
 TE 298.2 K  
 CNST2 145.0000000  
 CNST11 1.0000000  
 D1 2.00000000 sec  
 D20 0.00689655 sec  
 TDO 1

==== CHANNEL f1 =====  
 SFO1 100.6253446 MHz  
 NUC1 13C  
 P1 9.00 usec  
 P2 18.00 usec  
 PLW1 62.00000000 W

==== CHANNEL f2 =====  
 SFO2 400.1416006 MHz  
 NUC2 1H  
 CPDPRG2 waltz16  
 PCPD2 90.00 usec  
 PLW2 16.00000000 W  
 PLW12 0.36267000 W

F2 - Processing parameters  
 SI 32768  
 SF 100.6152830 MHz  
 WDW EM  
 SSB 0  
 LB 1.00 Hz  
 GB 0  
 PC 1.40

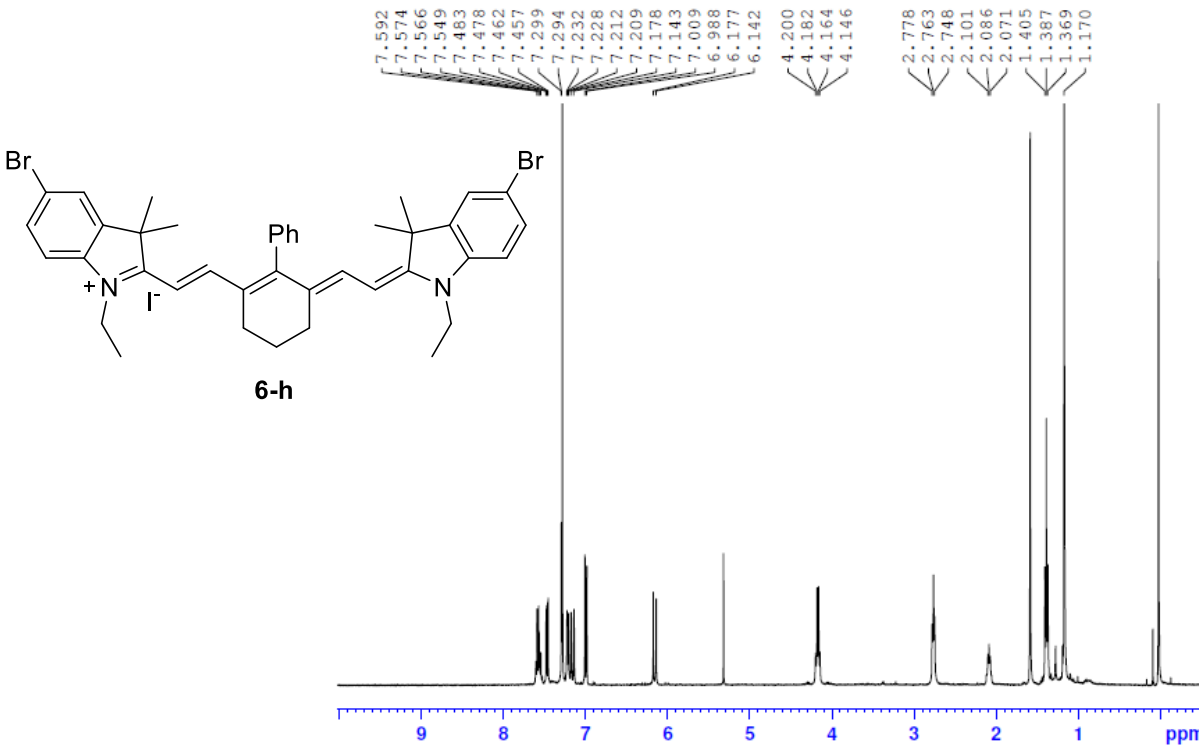

AC\_5\_CDC13\_1H

**BRUKER**

Current Data Parameters  
 NAME AC\_5\_CDC13\_1H  
 EXPNO 1  
 PROCNO 1

F2 - Acquisition Parameters  
 Date\_ 20160301  
 Time 13.51  
 INSTRUM spect  
 PROBHD 5 mm PABBO BB-  
 PULPROG zg30  
 ID 65536  
 SOLVENT CDC13  
 NS 14  
 DS 2  
 SWH 8012.820 Hz  
 FIDRES 0.122266 Hz  
 AQ 4.0894465 sec  
 RG 203  
 DW 62.400 usec  
 DE 6.50 usec  
 TE 298.0 K  
 D1 1.00000000 sec  
 ID0 1

CHANNEL f1  
 SFO1 400.1424710 MHz  
 NUC1 1H  
 P1 13.55 usec  
 PLW1 16.00000000 W

F2 - Processing parameters  
 SI 65536  
 SF 400.1400000 MHz  
 WDW EM  
 SSB 0  
 LB 0.30 Hz  
 GB 0  
 PC 1.00

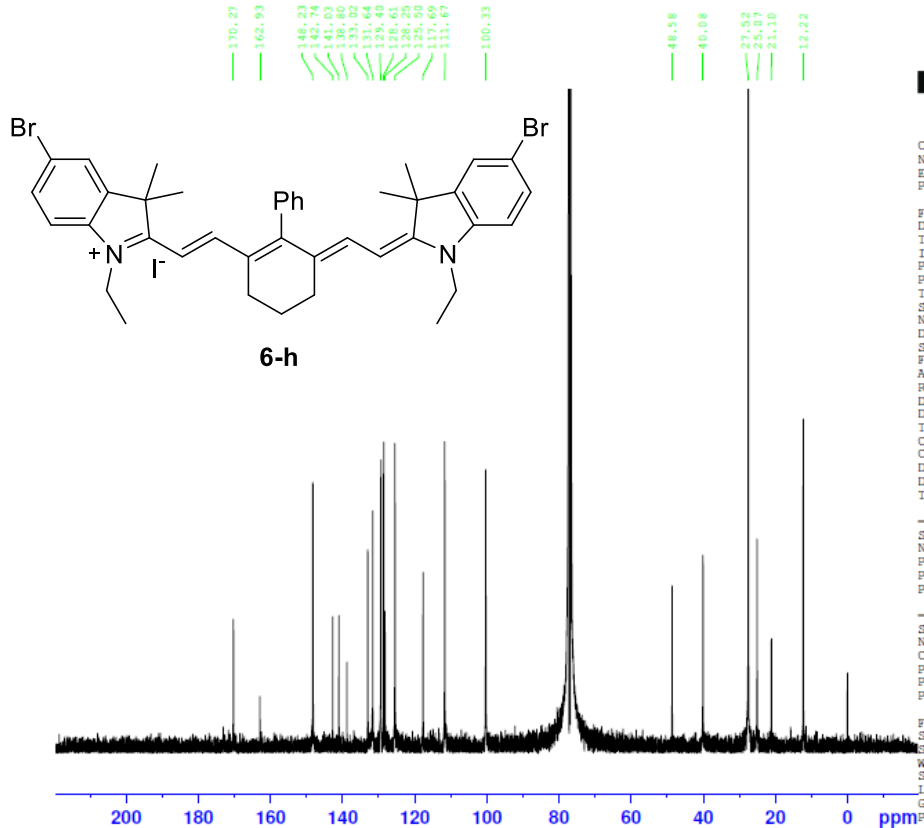

AC\_5\_CDC13\_13C

**BRUKER**

Current Data Parameters  
 NAME AC\_5\_CDC13\_13C  
 EXPNO 2  
 PROCNO 2

F2 - Acquisition Parameters  
 Date\_ 20160515  
 Time 23.51  
 INSTRUM spect  
 PROBHD 5 mm PABBO BB-  
 PULPROG jmod  
 ID 65536  
 SOLVENT CDC13  
 NS 10237  
 DS 4  
 SWH 24038.461 Hz  
 FIDRES 0.366798 Hz  
 AQ 1.3631488 sec  
 RG 203  
 DW 20.800 usec  
 DE 6.50 usec  
 TE 298.2 K  
 CNST2 145.0000000  
 CNST11 1.0000000  
 D1 2.00000000 sec  
 D20 0.00689655 sec  
 ID0 1

CHANNEL f1  
 SFO1 100.6253446 MHz  
 NUC1 13C  
 P1 9.00 usec  
 P2 18.00 usec  
 PLW1 62.00000000 W

CHANNEL f2  
 SFO2 400.1416006 MHz  
 NUC2 1H  
 CPDPRG[2] waltz16  
 PCPD2 90.00 usec  
 PLW2 16.00000000 W  
 PLW12 0.36267000 W

F2 - Processing parameters  
 SI 32768  
 SF 100.6152830 MHz  
 WDW EM  
 SSB 0  
 LB 1.00 Hz  
 GB 0  
 PC 1.40

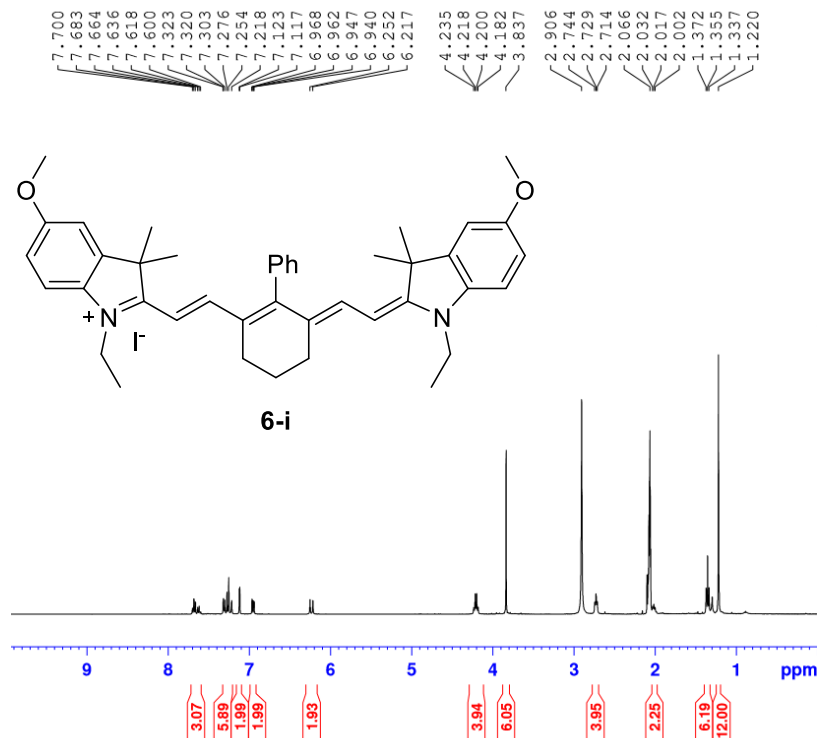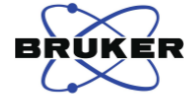

Current Data Parameters  
 NAME Ph-AC8-acetone-1H  
 EXPNO 3  
 PROCNO 1

F2 - Acquisition Parameters  
 Date\_ 20180112  
 Time 16.57  
 INSTRUM spect  
 PROBHD 5 mm PABBO BB-  
 PULPROG zg30  
 TD 65536  
 SOLVENT Acetone  
 NS 3  
 DS 2  
 SWH 8012.820 Hz  
 FIDRES 0.122266 Hz  
 AQ 4.0894465 sec  
 RG 114  
 DW 62.400 usec  
 DE 6.50 usec  
 TE 295.5 K  
 D1 1.00000000 sec  
 TD0 1

==== CHANNEL f1 =====  
 SFO1 400.1424710 MHz  
 NUC1 1H  
 P1 13.55 usec  
 PLW1 16.00000000 W

F2 - Processing parameters  
 SI 65536  
 SF 400.1400000 MHz  
 WDW EM  
 SSB 0  
 LB 0.30 Hz  
 GB 0  
 PC 1.00

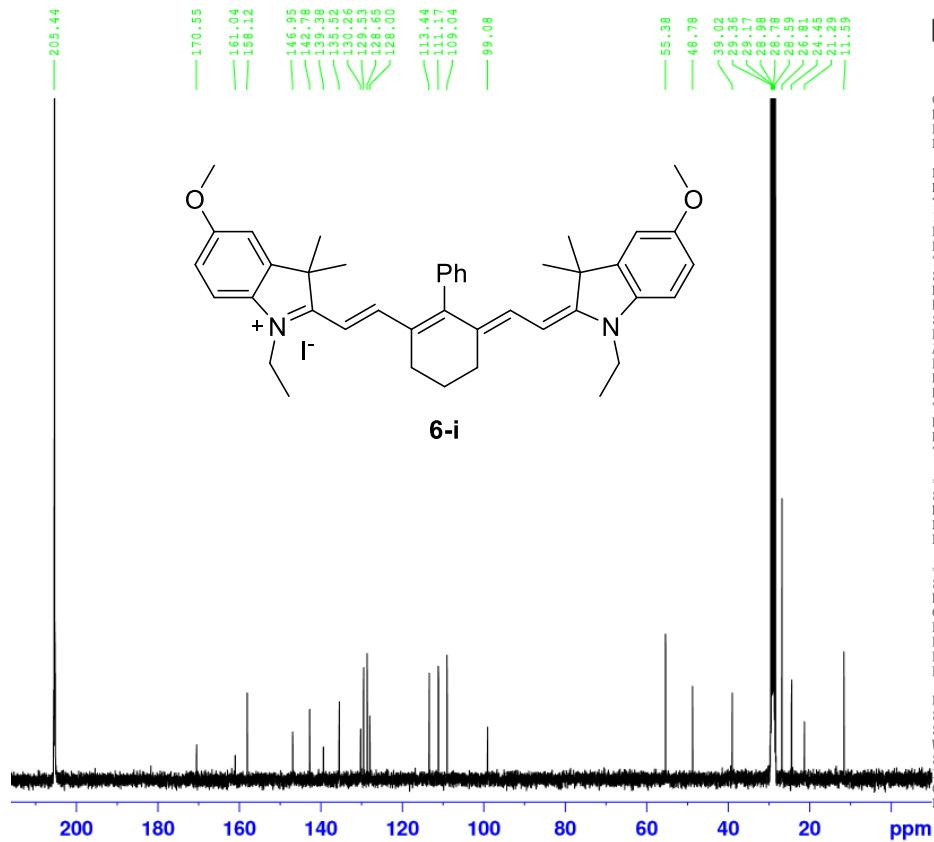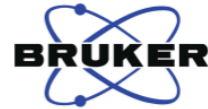

Current Data Parameters  
 NAME Ph-AC8-acetone-13C  
 EXPNO 2  
 PROCNO 1

F2 - Acquisition Parameters  
 Date\_ 20180116  
 Time 13.52  
 INSTRUM spect  
 PROBHD 5 mm PABBO BB-  
 PULPROG zgpg30  
 TD 65536  
 SOLVENT Acetone  
 NS 2055  
 DS 4  
 SWH 24038.461 Hz  
 FIDRES 0.366798 Hz  
 AQ 1.3631488 sec  
 RG 203  
 DW 20.800 usec  
 DE 6.50 usec  
 TE 295.1 K  
 D1 2.00000000 sec  
 D11 0.03000000 sec  
 TD0 1

==== CHANNEL f1 =====  
 SFO1 100.6253441 MHz  
 NUC1 13C  
 P1 9.25 usec  
 PLW1 62.00000000 W

==== CHANNEL f2 =====  
 SFO2 400.1416006 MHz  
 NUC2 1H  
 CPDPRG12 waltz16  
 PCDD2 90.00 usec  
 PLW2 16.00000000 W  
 PLW12 0.36267000 W  
 PLW13 0.29376000 W

F2 - Processing parameters  
 SI 32768  
 SF 100.6152830 MHz  
 WDW EM  
 SSB 0  
 LB 1.00 Hz  
 GB 0  
 PC 1.40

Signal seen at  $\delta$  205.44 ppm corresponds to the carbonyl group of acetone- $d_6$

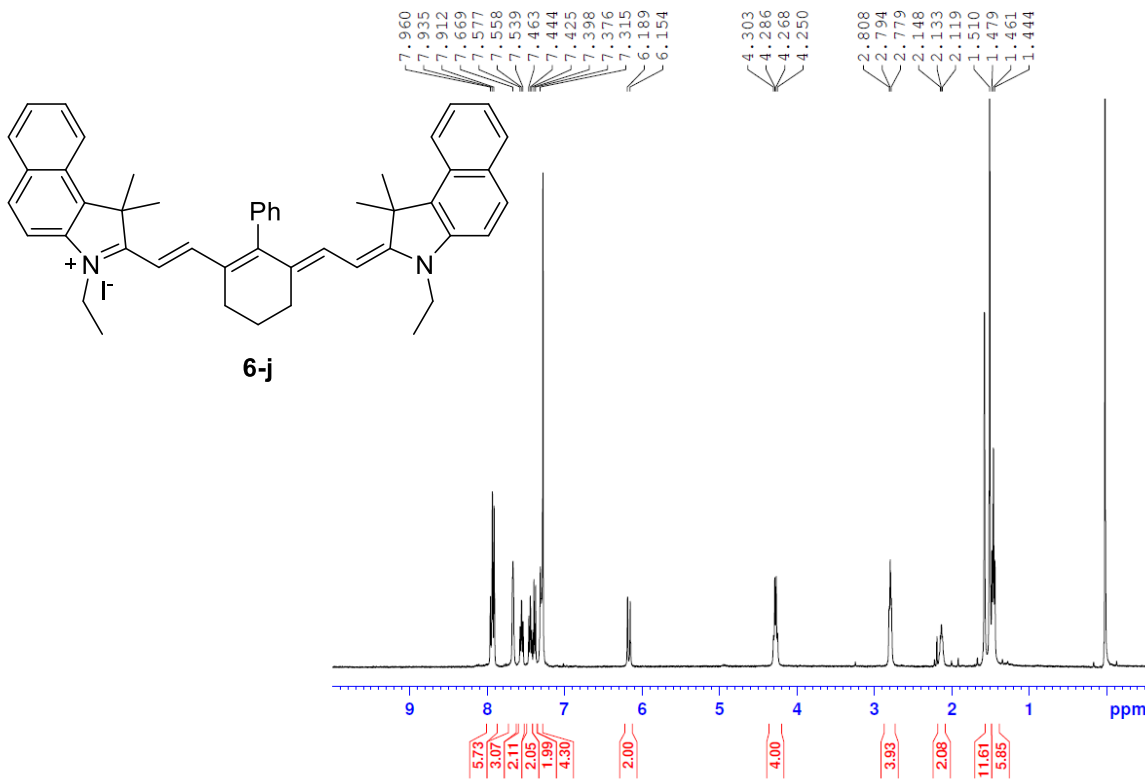

**BRUKER**

Current Data Parameters  
 NAME AC\_6\_CDC13\_1H  
 EXPNO 1  
 PROCNO 1

F2 - Acquisition Parameters  
 Date\_ 20160410  
 Time 22.42  
 INSTRUM spect  
 PROBHD 5 mm PABBO BB-  
 PULPROG zg30  
 TD 65536  
 SOLVENT CDC13  
 NS 20  
 DS 2  
 SWH 8012.820 Hz  
 FIDRES 0.122266 Hz  
 AQ 4.0894465 sec  
 RG 203  
 DW 62.400 usec  
 DE 6.50 usec  
 TE 298.0 K  
 D1 1.00000000 sec  
 TDO 1

==== CHANNEL f1 =====  
 SFO1 400.1424710 MHz  
 NUC1 1H  
 P1 13.55 usec  
 PLW1 16.00000000 W

F2 - Processing parameters  
 SI 65536  
 SF 400.1400000 MHz  
 WDW EM  
 SSB 0  
 LB 0.30 Hz  
 GB 0  
 PC 1.00

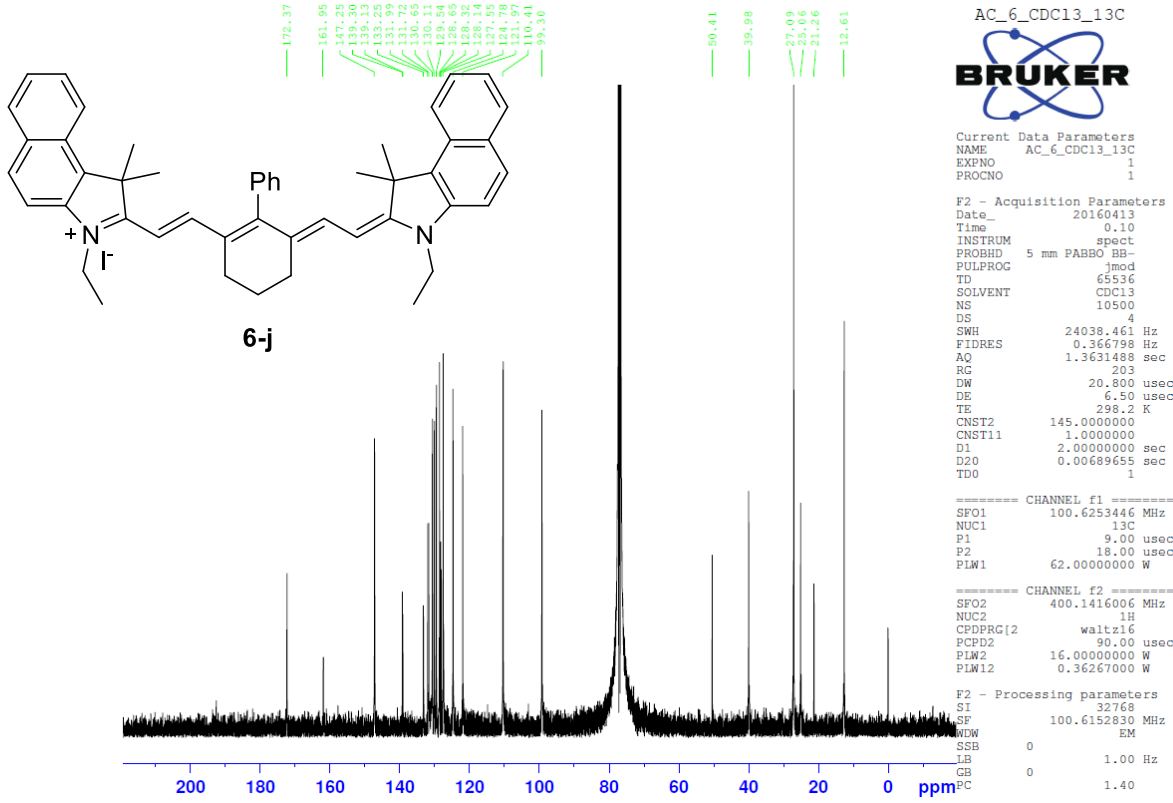

**BRUKER**

Current Data Parameters  
 NAME AC\_6\_CDC13\_13C  
 EXPNO 1  
 PROCNO 1

F2 - Acquisition Parameters  
 Date\_ 20160413  
 Time 0.10  
 INSTRUM spect  
 PROBHD 5 mm PABBO BB-  
 PULPROG jmod  
 TD 65536  
 SOLVENT CDC13  
 NS 10500  
 DS 4  
 SWH 24038.461 Hz  
 FIDRES 0.366798 Hz  
 AQ 1.3631488 sec  
 RG 203  
 DW 20.800 usec  
 DE 6.50 usec  
 TE 298.2 K  
 CNST2 145.0000000  
 CNST11 1.0000000  
 D1 2.00000000 sec  
 D20 0.00689655 sec  
 TDO 1

==== CHANNEL f1 =====  
 SFO1 100.6253446 MHz  
 NUC1 13C  
 P1 9.00 usec  
 P2 18.00 usec  
 PLW1 62.00000000 W

==== CHANNEL f2 =====  
 SFO2 400.1416006 MHz  
 NUC2 1H  
 CPDPRG[2] waltz16  
 PCPD2 90.00 usec  
 PLW2 16.00000000 W  
 PLW12 0.36267000 W

F2 - Processing parameters  
 SI 32768  
 SF 100.6152830 MHz  
 WDW EM  
 SSB 0  
 LB 1.00 Hz  
 GB 0  
 PC 1.40

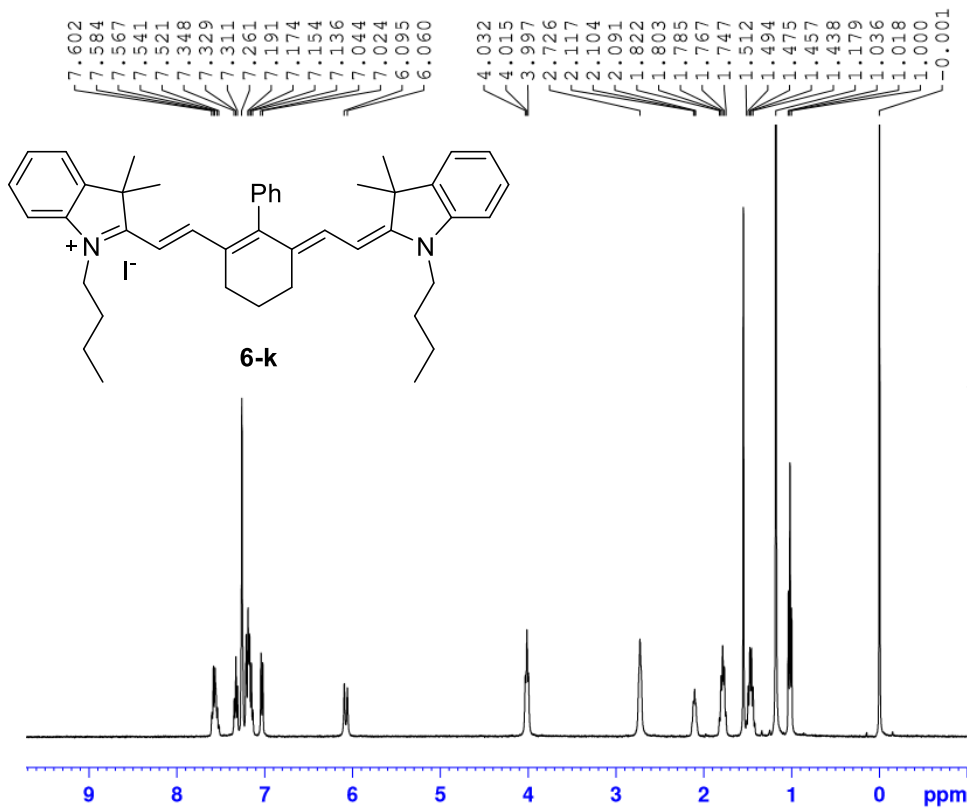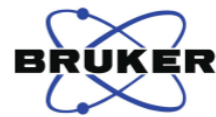

Current Data Parameters  
 NAME FM\_4\_CDC13\_1H  
 EXPNO 1  
 PROCNO 1

F2 - Acquisition Parameters  
 Date\_ 20160315  
 Time 13.41  
 INSTRUM spect  
 PROBHD 5 mm PABBO BB-  
 PULPROG zg30  
 TD 65536  
 SOLVENT CDC13  
 NS 12  
 DS 2  
 SWH 8012.820 Hz  
 FIDRES 0.122266 Hz  
 AQ 4.089465 sec  
 RG 203  
 DW 62.400 usec  
 DE 6.50 usec  
 TE 298.0 K  
 D1 1.00000000 sec  
 TD0 1

===== CHANNEL f1 =====  
 SFO1 400.1424710 MHz  
 NUC1 1H  
 P1 13.55 usec  
 PLW1 16.00000000 W

F2 - Processing parameters  
 SI 65536  
 SF 400.1400085 MHz  
 WDW EM  
 SSB 0  
 LB 0.30 Hz  
 GB 0  
 PC 1.00

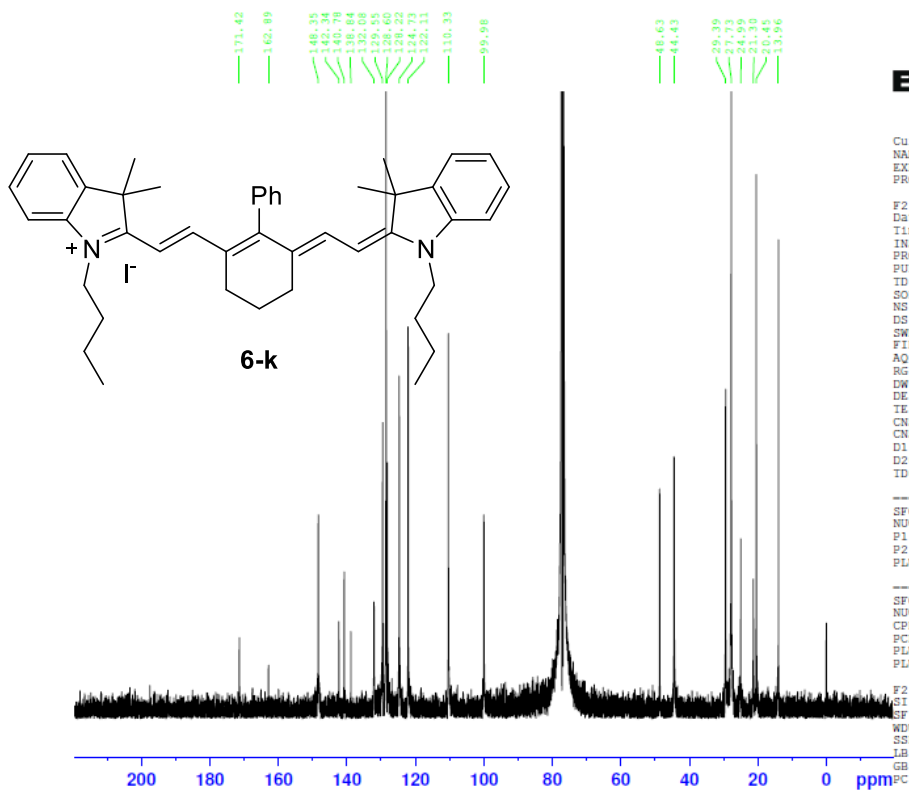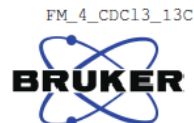

FM\_4\_CDC13\_13C

Current Data Parameters  
 NAME FM\_4\_CDC13\_13C  
 EXPNO 1  
 PROCNO 1

F2 - Acquisition Parameters  
 Date\_ 20160504  
 Time 0.41  
 INSTRUM spect  
 PROBHD 5 mm PABBO BB-  
 PULPROG jmod  
 TD 65536  
 SOLVENT CDC13  
 NS 9573  
 DS 4  
 SWH 24038.461 Hz  
 FIDRES 0.366798 Hz  
 AQ 1.3631488 sec  
 RG 203  
 DW 20.800 usec  
 DE 6.50 usec  
 TE 298.2 K  
 CNST2 145.0000000  
 CNST11 1.0000000  
 D1 2.00000000 sec  
 D20 0.00689655 sec  
 TD0 1

===== CHANNEL f1 =====  
 SFO1 100.6253446 MHz  
 NUC1 13C  
 P1 9.00 usec  
 P2 18.00 usec  
 PLW1 62.00000000 W

===== CHANNEL f2 =====  
 SFO2 400.1416006 MHz  
 NUC2 1H  
 CPDPRG2 waltz16  
 PCPD2 90.00 usec  
 PLW2 16.00000000 W  
 PLW12 0.36267000 W

F2 - Processing parameters  
 SI 32768  
 SF 100.6152830 MHz  
 WDW EM  
 SSB 0  
 LB 1.00 Hz  
 GB 0  
 PC 1.40

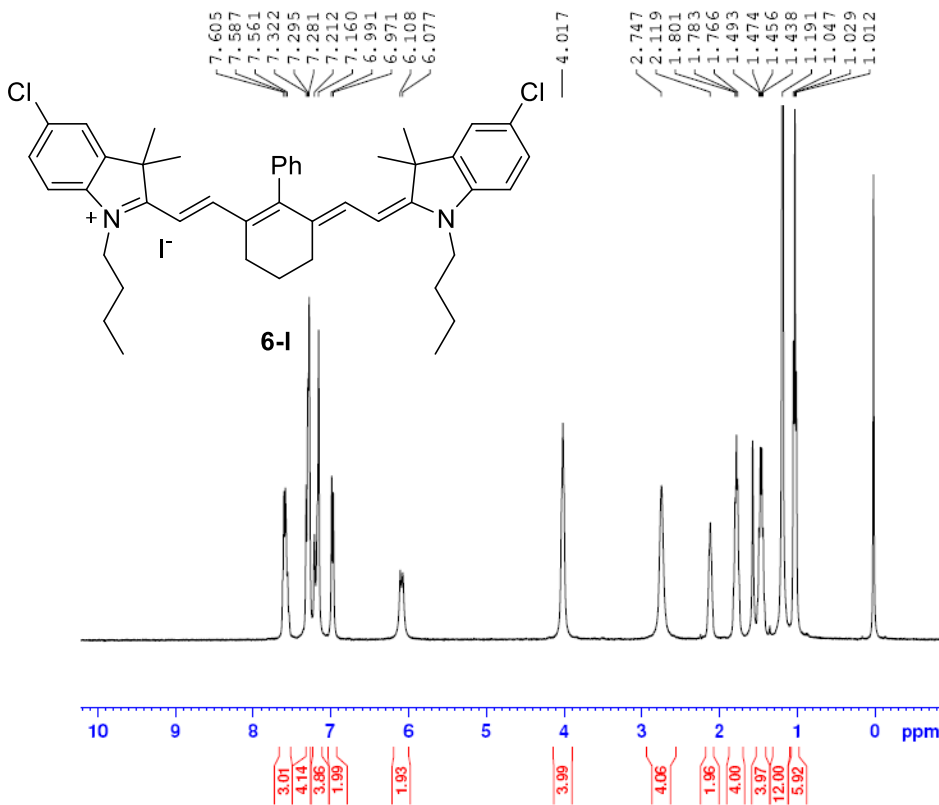

FM\_C1Dye\_CDC13\_1H

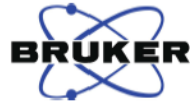

Current Data Parameters  
 NAME FM\_C1Dye\_CDC13\_1H  
 EXPNO 1  
 PROCNO 1

F2 - Acquisition Parameters  
 Date\_ 20160328  
 Time 15:19  
 INSTRUM spect  
 PROBHD 5 mm FAPBO BB-  
 PULPROG zg30  
 ID 65536  
 SOLVENT CDCl3  
 NS 13  
 DS 2  
 SWH 8012.820 Hz  
 FIDRES 0.122266 Hz  
 AQ 4.0894465 sec  
 RG 161  
 DW 62.400 usec  
 DE 6.50 usec  
 TE 298.0 K  
 D1 1.00000000 sec  
 TD0 1

CHANNEL f1  
 SFO1 400.1424710 MHz  
 NUC1 1H  
 F1 13.55 usec  
 PLW1 16.00000000 W

F2 - Processing parameters  
 SI 65536  
 SF 400.1400000 MHz  
 MDW EM  
 SSB 0  
 LB 0.30 Hz  
 GB 0  
 PC 1.00

10 9 8 7 6 5 4 3 2 1 0 ppm

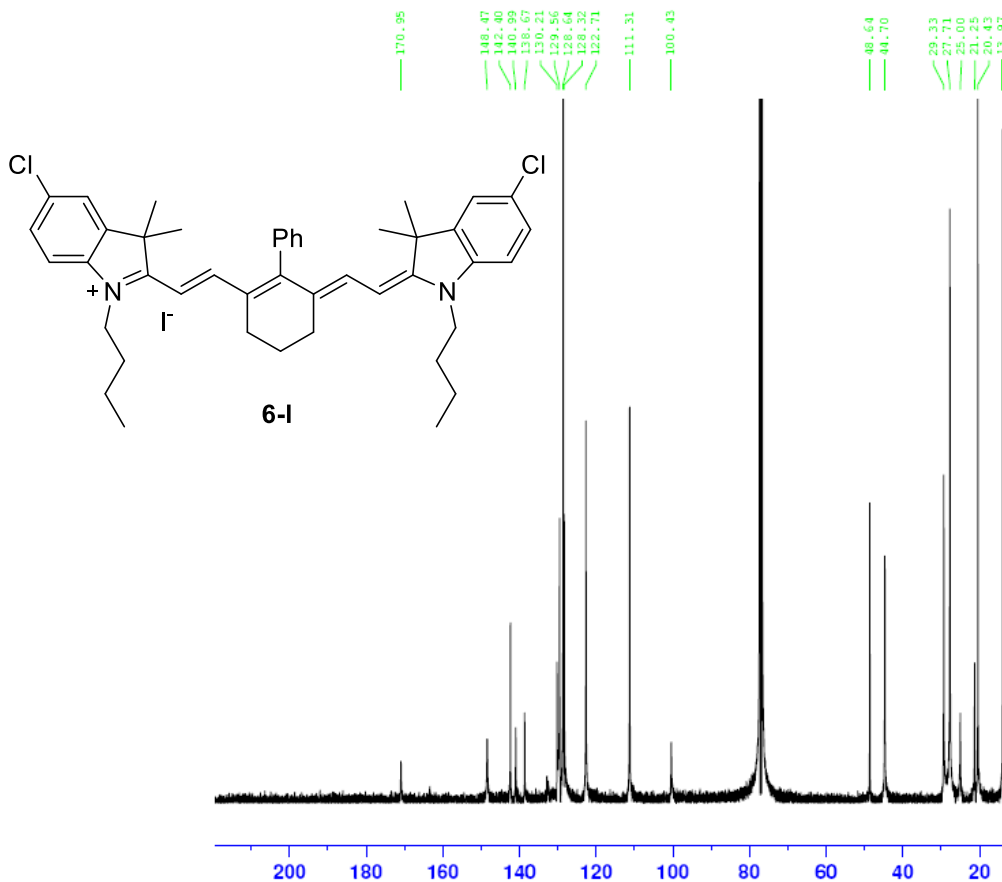

FM\_C1Dye\_CDC13\_13C

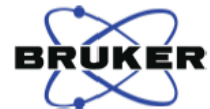

Current Data Parameters  
 NAME FM\_C1Dye\_CDC13\_13C  
 EXPNO 1  
 PROCNO 1

F2 - Acquisition Parameters  
 Date\_ 20160401  
 Time 0:24  
 INSTRUM spect  
 PROBHD 5 mm FAPBO BB-  
 PULPROG jmod  
 ID 65536  
 SOLVENT CDCl3  
 NS 10206  
 DS 4  
 SWH 24038.461 Hz  
 FIDRES 0.366798 Hz  
 AQ 1.3631488 sec  
 RG 203  
 DW 20.800 usec  
 DE 6.50 usec  
 TE 298.2 K  
 CNST2 145.0000000  
 CNST11 1.0000000  
 D1 2.00000000 sec  
 D20 0.00689655 sec  
 TD0 1

CHANNEL f1  
 SFO1 100.6253446 MHz  
 NUC1 13C  
 F1 9.00 usec  
 P2 18.00 usec  
 PLW1 62.00000000 W

CHANNEL f2  
 SFO2 400.1416006 MHz  
 NUC2 1H  
 CPDPRG2 waltz16  
 FCPD2 90.00 usec  
 PLW2 16.00000000 W  
 PLW12 0.36267000 W

F2 - Processing parameters  
 SI 32768  
 SF 100.6152830 MHz  
 MDW EM  
 SSB 0  
 LB 1.00 Hz  
 GB 0  
 PC 1.40

200 180 160 140 120 100 80 60 40 20 0 ppm

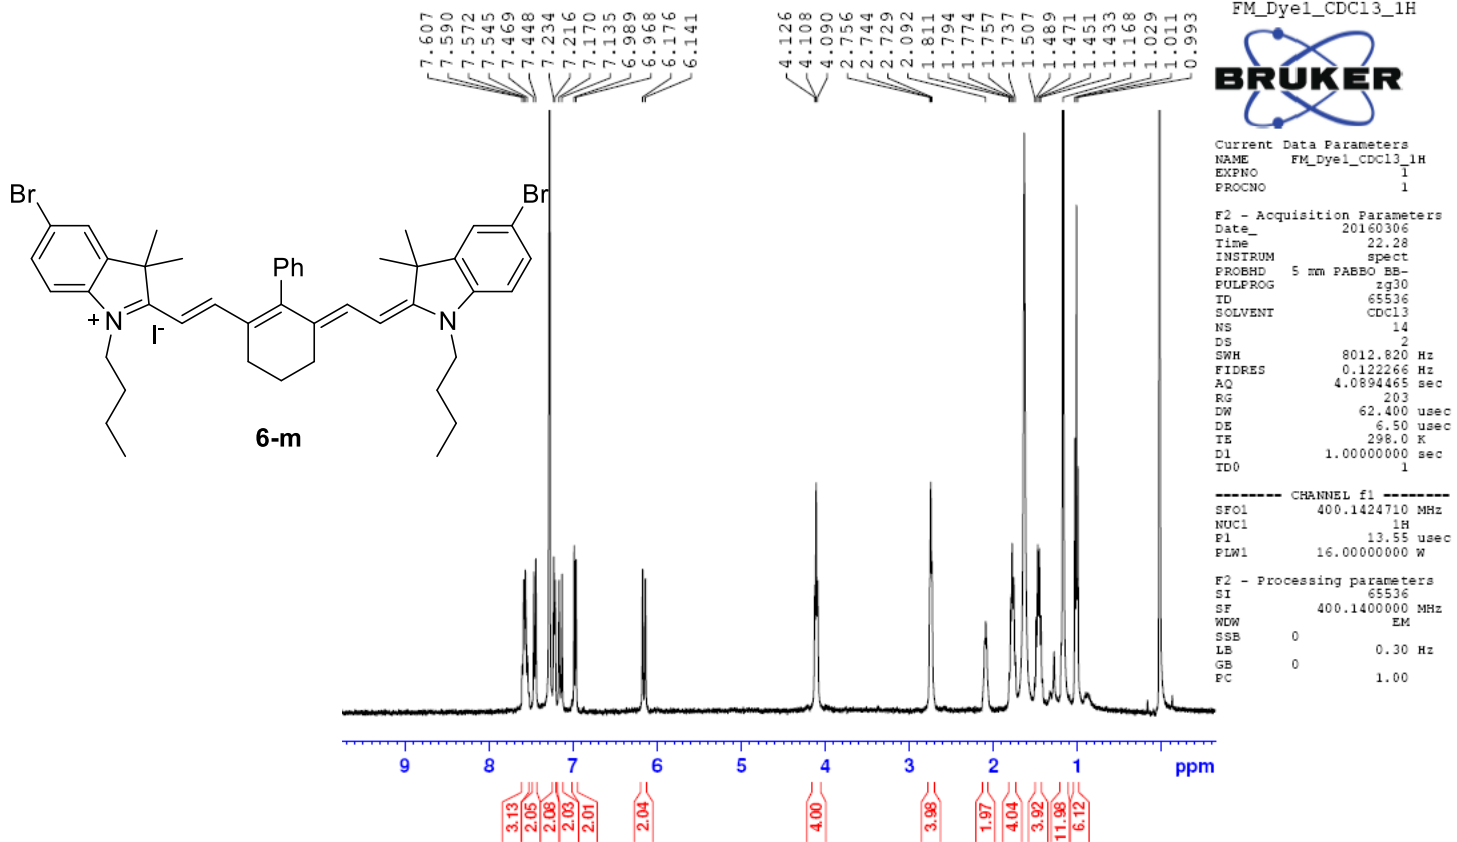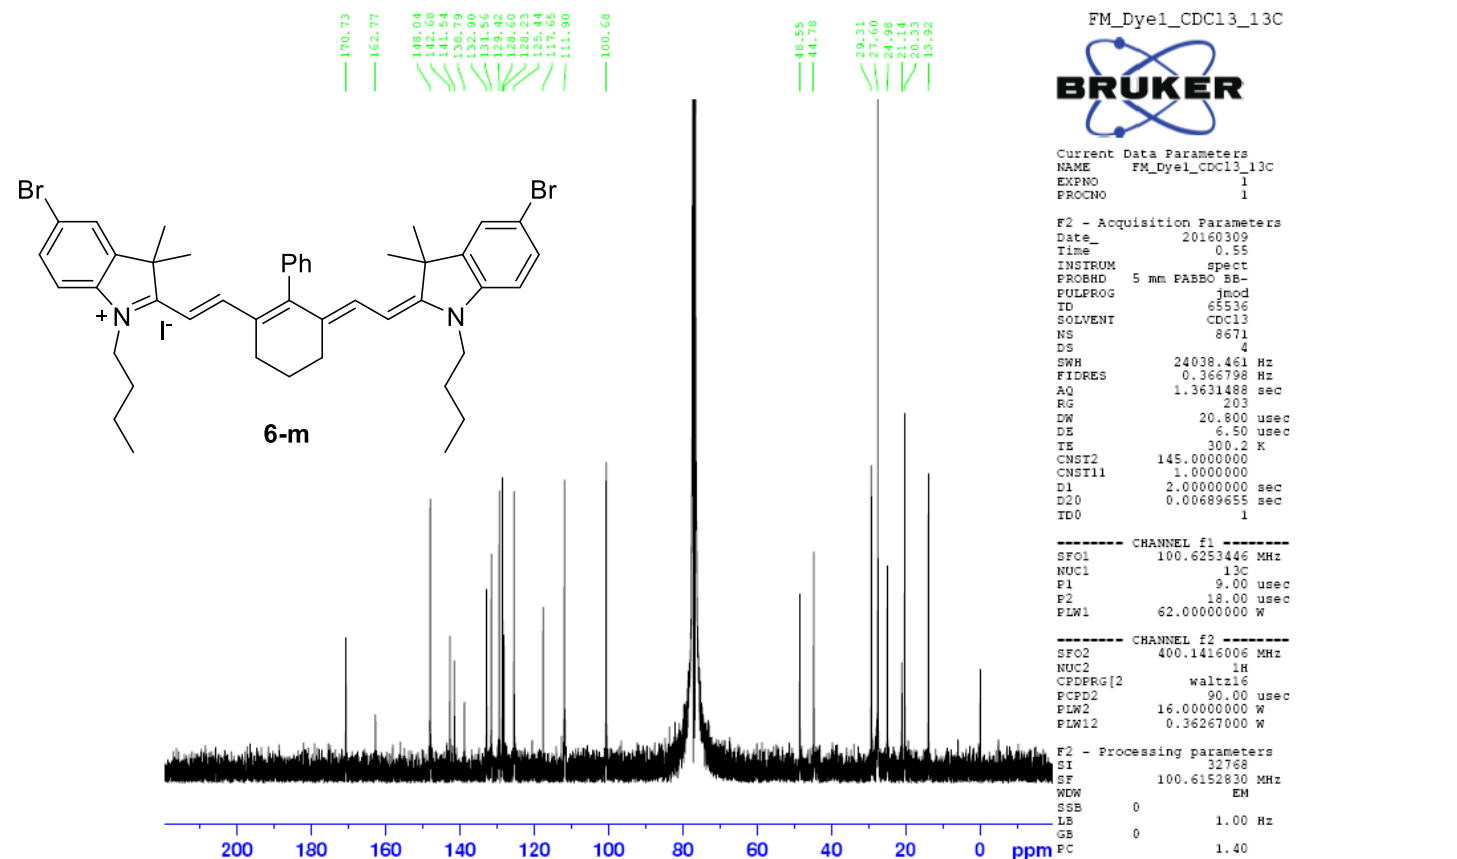

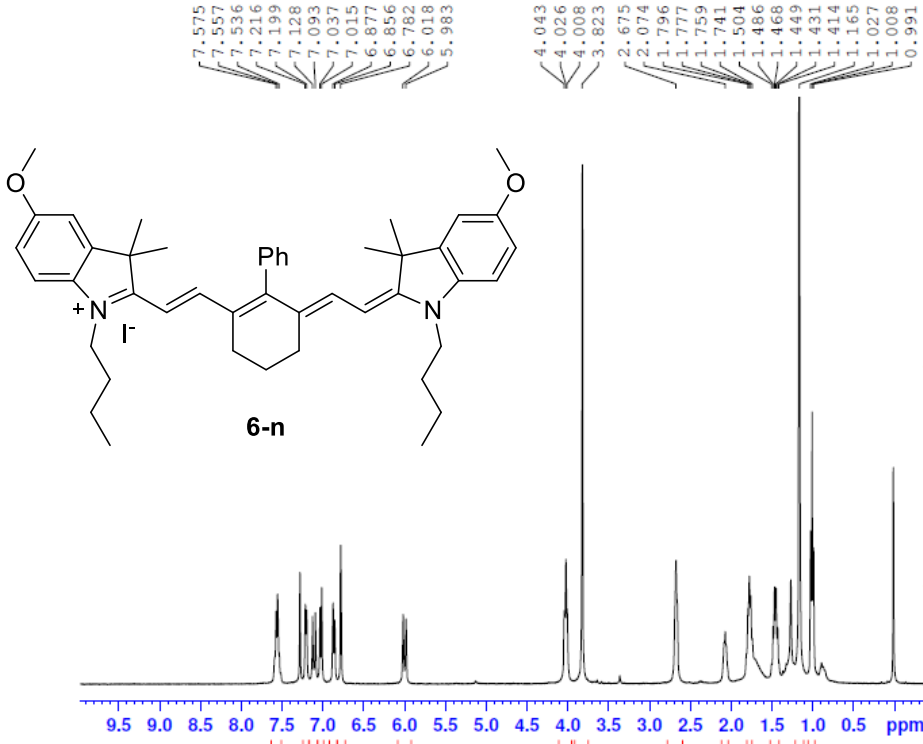

**FM\_14\_CDC13\_1H**

**BRUKER**

Current Data Parameters  
 NAME FM\_14\_CDC13\_1H  
 EXPNO 3  
 PROCNO 3

F2 - Acquisition Parameters  
 Date\_ 20160414  
 Time 13.55  
 INSTRUM spect  
 PROBHD 5 mm PABBO BB-  
 PULPROG zg30  
 ID 65536  
 SOLVENT CDC13  
 NS 11  
 DS 2  
 SWH 8012.820 Hz  
 FIDRES 0.122266 Hz  
 AQ 4.0894465 sec  
 RG 144  
 DW 62.400 usec  
 DE 6.50 usec  
 TE 298.0 K  
 D1 1.00000000 sec  
 TDO 1

CHANNEL f1  
 SFO1 400.1424710 MHz  
 NUC1 1H  
 P1 13.55 usec  
 PLW1 16.00000000 W

F2 - Processing parameters  
 SI 65536  
 SF 400.1400000 MHz  
 WDW EM  
 SSB 0  
 LB 0.30 Hz  
 GB 0  
 PC 1.00

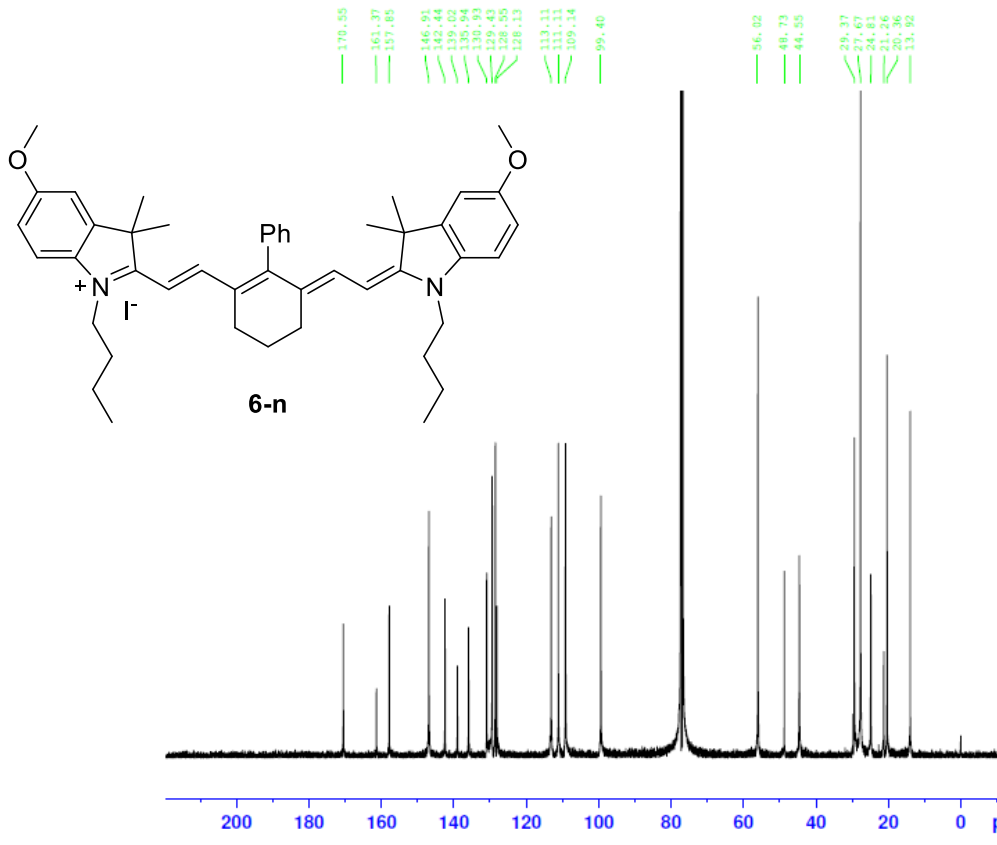

**FM\_14\_CDC13\_13C**

**BRUKER**

Current Data Parameters  
 NAME FM\_14\_CDC13\_13C  
 EXPNO 1  
 PROCNO 1

F2 - Acquisition Parameters  
 Date\_ 20160425  
 Time 23.59  
 INSTRUM spect  
 PROBHD 5 mm PABBO BB-  
 PULPROG jmod  
 ID 65536  
 SOLVENT CDC13  
 NS 10899  
 DS 4  
 SWH 24038.461 Hz  
 FIDRES 0.366798 Hz  
 AQ 1.3631488 sec  
 RG 203  
 DW 20.800 usec  
 DE 6.50 usec  
 TE 298.3 K  
 CNST2 145.0000000  
 CNST11 1.0000000  
 D1 2.0000000 sec  
 D20 0.00689655 sec  
 TDO 1

CHANNEL f1  
 SFO1 100.6253446 MHz  
 NUC1 13C  
 P1 9.00 usec  
 P2 18.00 usec  
 PLW1 62.00000000 W

CHANNEL f2  
 SFO2 400.1416006 MHz  
 NUC2 1H  
 CPDPRG[2] waltz16  
 FCPD2 90.00 usec  
 PLW2 16.00000000 W  
 PLW12 0.36267000 W

F2 - Processing parameters  
 SI 32768  
 SF 100.6152830 MHz  
 WDW EM  
 SSB 0  
 LB 1.00 Hz  
 GB 0  
 PC 1.40



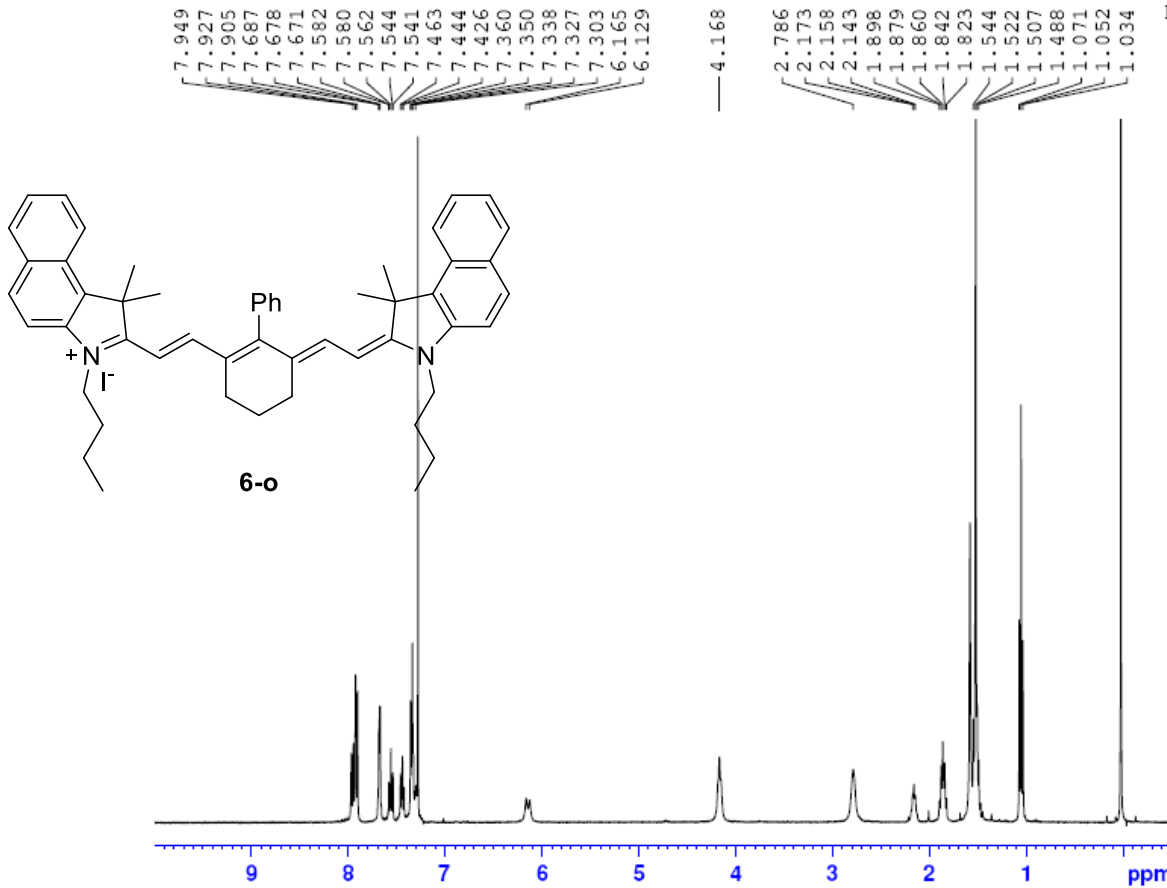

FM\_BenzEdey\_CDC13\_1H

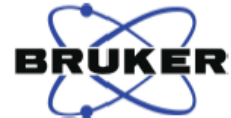

Current Data Parameters  
 NAME FM\_BenzEdey\_CDC13\_1H  
 EXPNO 1  
 PROCNO 1

F2 - Acquisition Parameters  
 Date\_ 20160401  
 Time 16.14  
 INSTRUM spect  
 PROBHD 5 mm PABBO BB-  
 PULPROG zg30  
 ID 65536  
 SOLVENT CDCl3  
 NS 15  
 DS 2  
 SWH 8012.820 Hz  
 FIDRES 0.122266 Hz  
 AQ 4.0894465 sec  
 RG 203  
 DW 62.400 usec  
 DE 6.50 usec  
 TE 298.0 K  
 D1 1.0000000 sec  
 ID0 1

----- CHANNEL f1 -----  
 SFO1 400.1424710 MHz  
 NUC1 1H  
 P1 13.55 usec  
 PLW1 16.0000000 W

F2 - Processing parameters  
 SI 65536  
 SF 400.1400000 MHz  
 WDW EM  
 SSB 0  
 LB 0.30 Hz  
 GB 0  
 PC 1.00

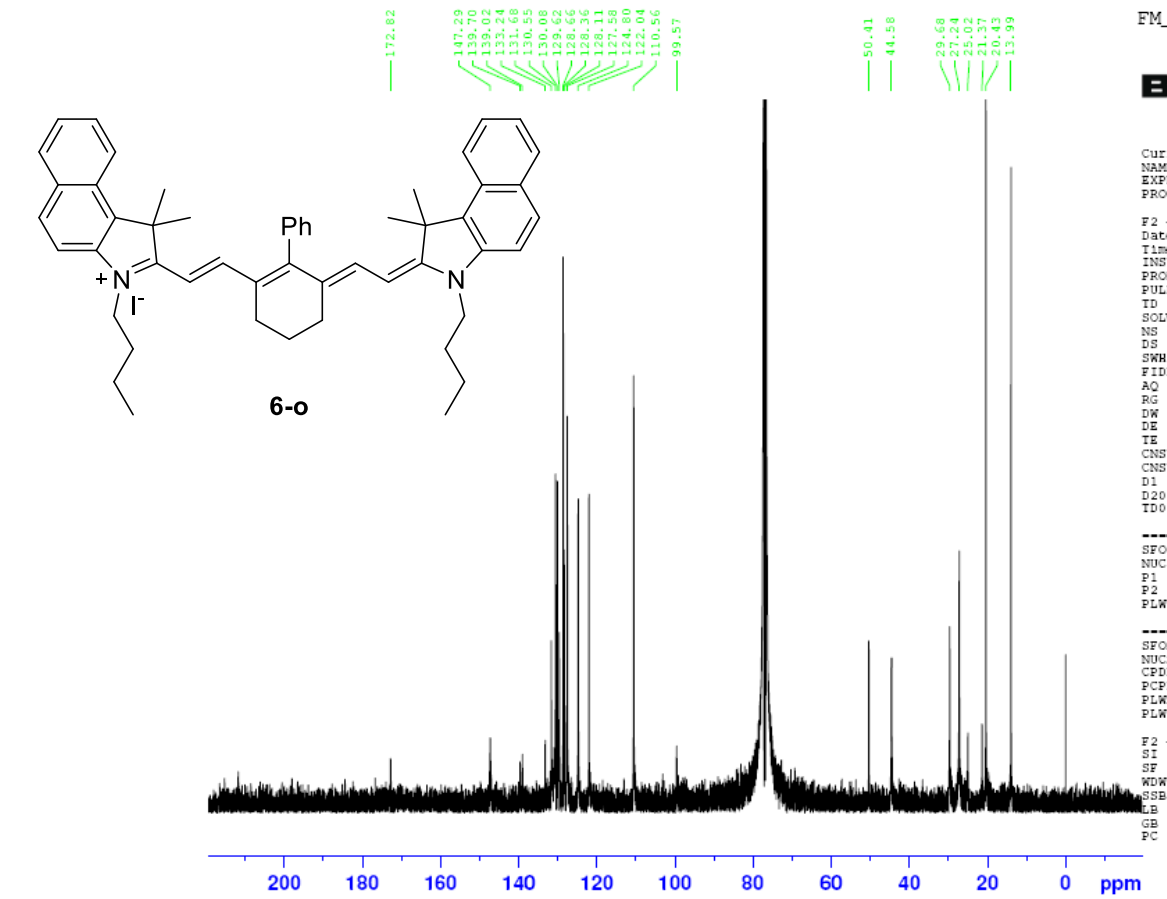

FM\_BenzEdey\_CDC13\_13C

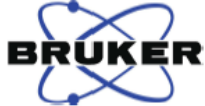

Current Data Parameters  
 NAME FM\_BenzEdey\_CDC13\_13C  
 EXPNO 1  
 PROCNO 1

F2 - Acquisition Parameters  
 Date\_ 20160402  
 Time 2.09  
 INSTRUM spect  
 PROBHD 5 mm PABBO BB-  
 PULPROG jmod  
 ID 65536  
 SOLVENT CDCl3  
 NS 8831  
 DS 4  
 SWH 24038.461 Hz  
 FIDRES 0.366798 Hz  
 AQ 1.3631488 sec  
 RG 203  
 DW 20.800 usec  
 DE 6.50 usec  
 TE 298.2 K  
 CNST2 145.0000000  
 CNST11 1.0000000  
 D1 2.0000000 sec  
 D20 0.00689655 sec  
 ID0 1

----- CHANNEL f1 -----  
 SFO1 100.6253446 MHz  
 NUC1 13C  
 P1 9.00 usec  
 P2 18.00 usec  
 PLW1 62.0000000 W

----- CHANNEL f2 -----  
 SFO2 400.1416006 MHz  
 NUC2 1H  
 CPDPRG[2] waltz16  
 PCPD2 90.00 usec  
 PLW2 16.0000000 W  
 PLW12 0.36267000 W

F2 - Processing parameters  
 SI 32768  
 SF 100.6152830 MHz  
 WDW EM  
 SSB 0  
 LB 1.00 Hz  
 GB 0  
 PC 1.40

$y = 266800x + 0.0005$   
 $R^2 = 0.9956$

6-aT1 ABS

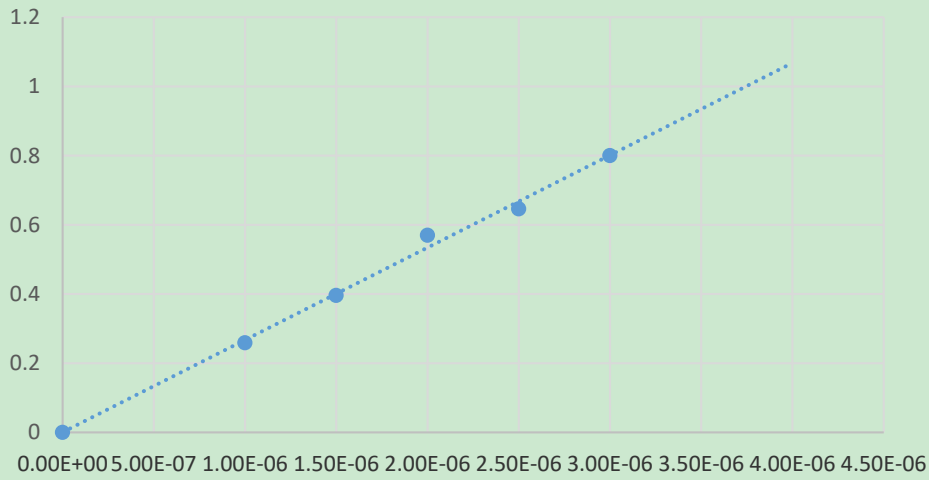

$y = 266800x + 0.0005$   
 $R^2 = 0.9956$

6-aT1 ABS

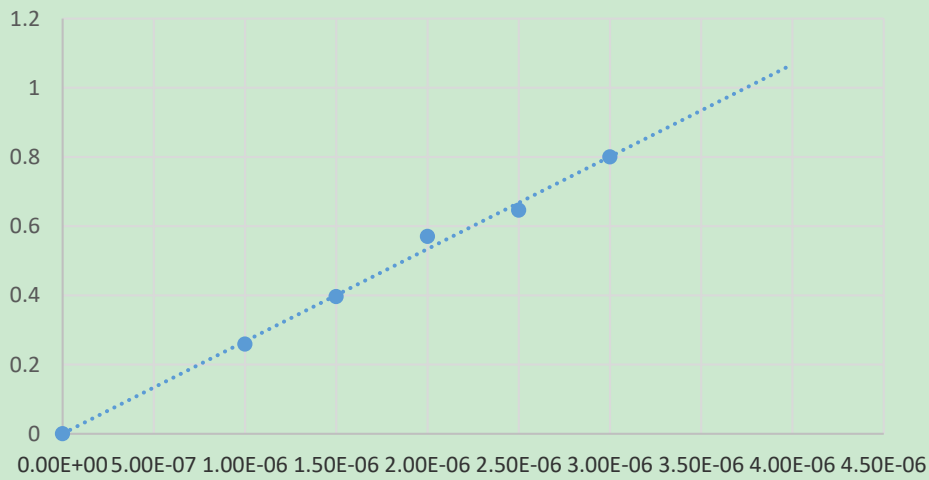

### 6-aT1 ABS

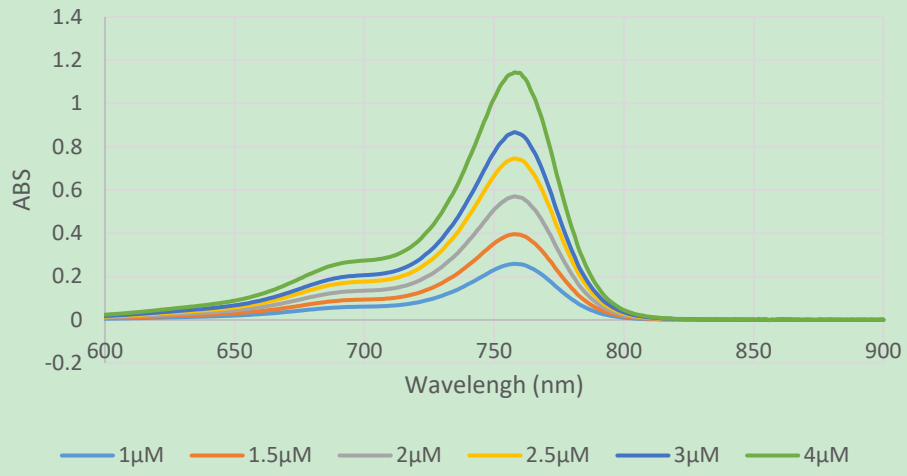

### 6-aT2 ABS

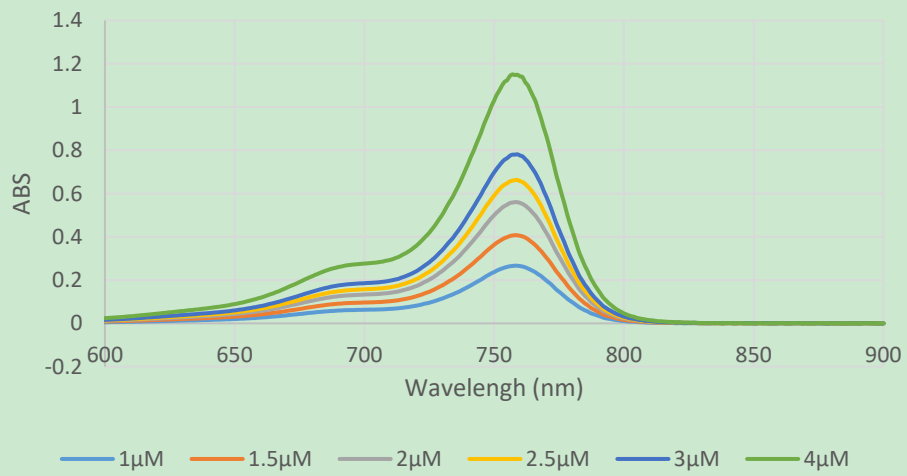

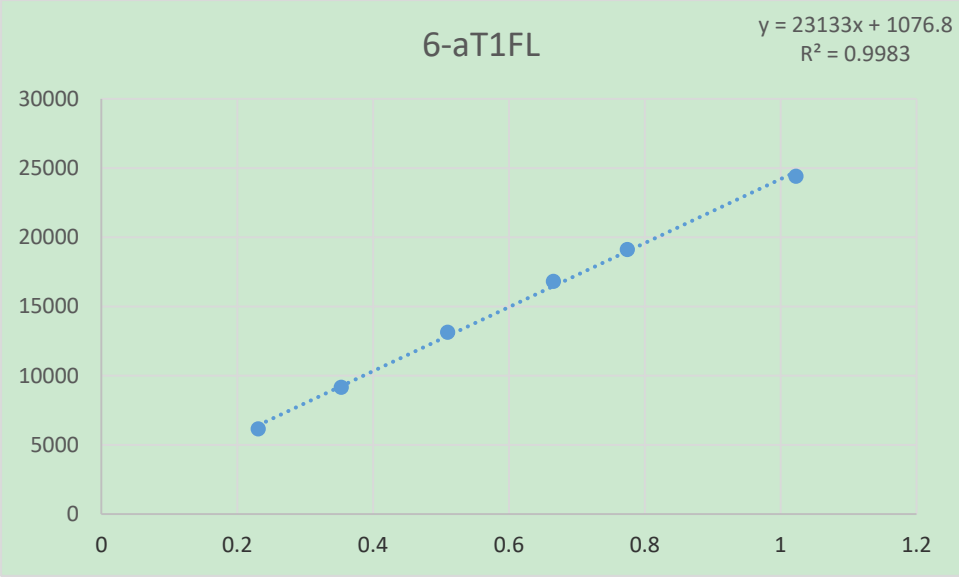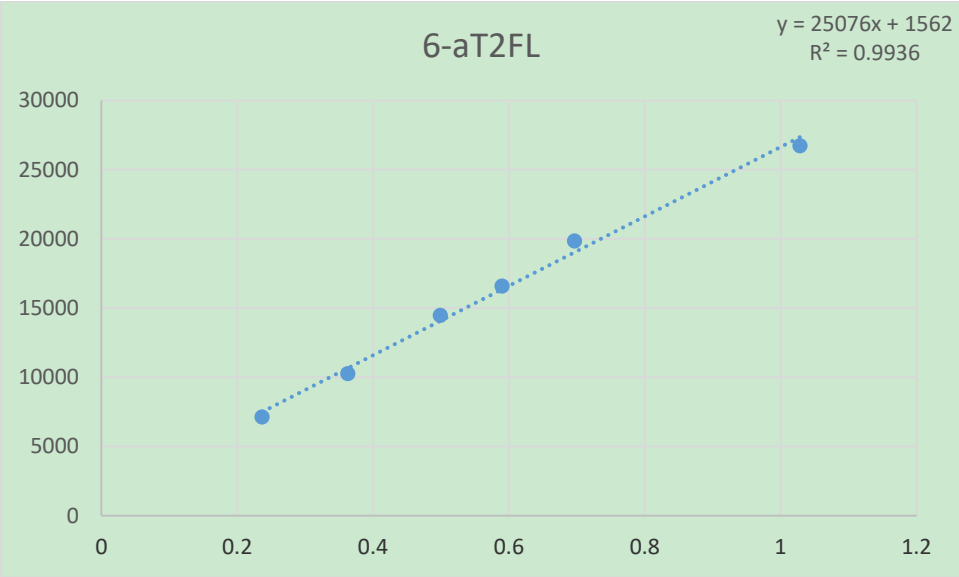

6-aT1 FL

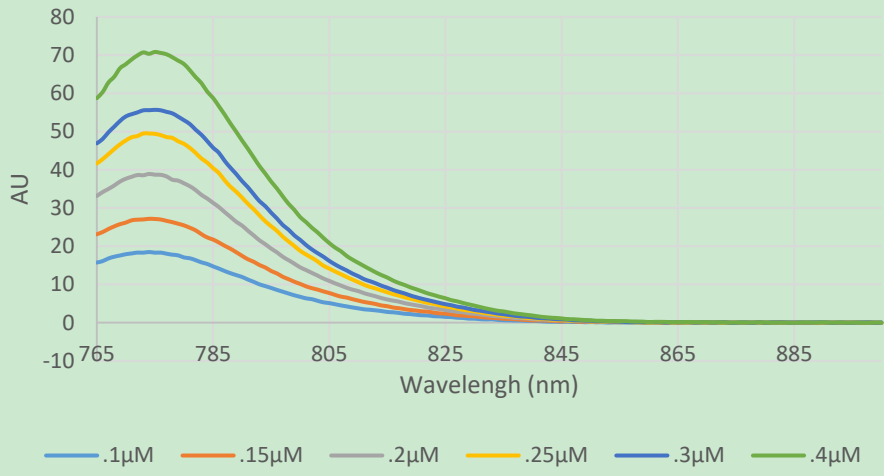

6-aT2 FL

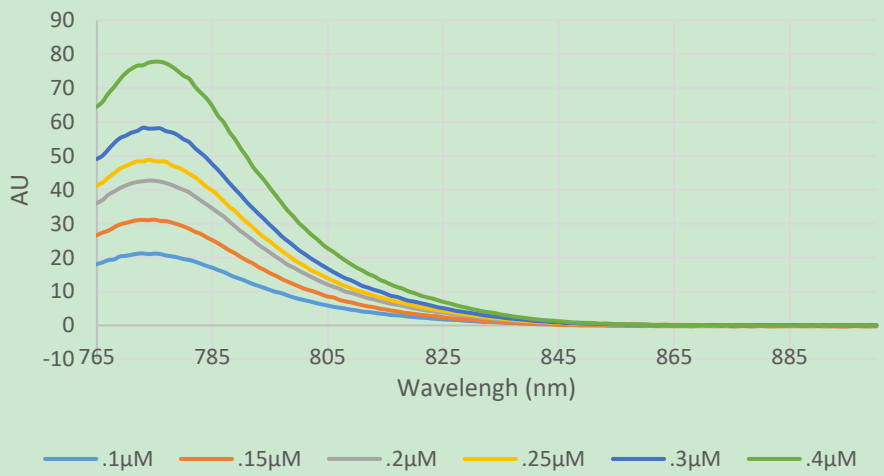

6-bT1 abs

$y = 260571x - 0.022$   
 $R^2 = 0.998$

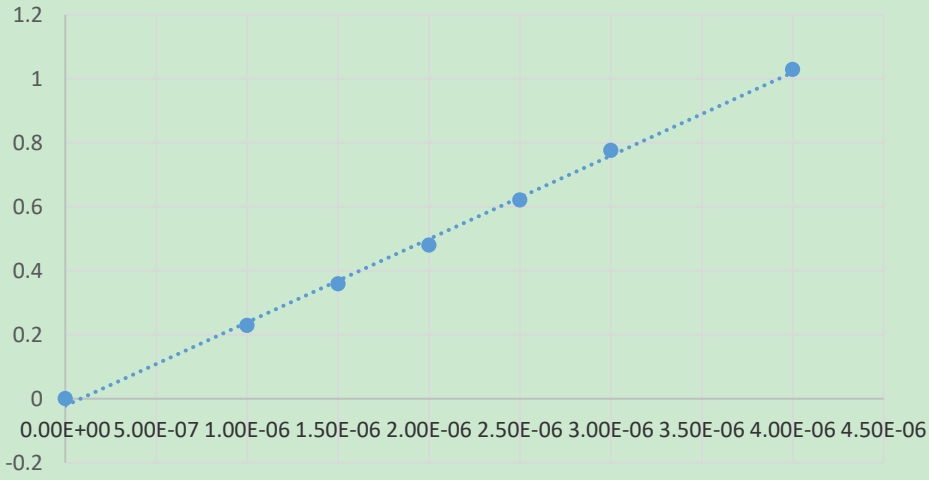

6-bT2 abs

$y = 261476x + 0.0012$   
 $R^2 = 0.9992$

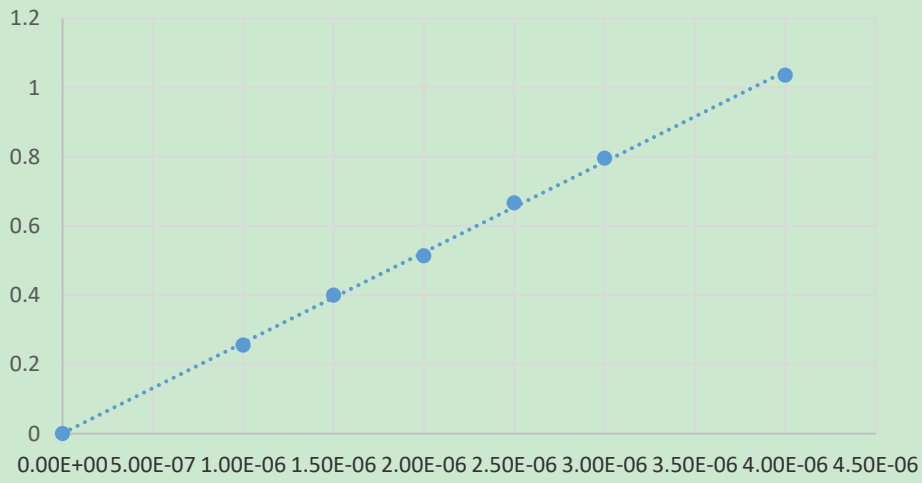

### 6-bT1 ABS

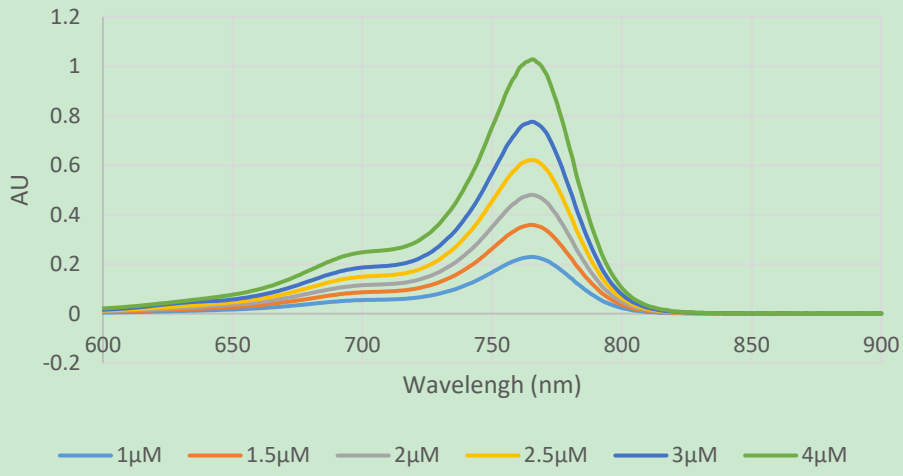

### 6-bT2 ABS

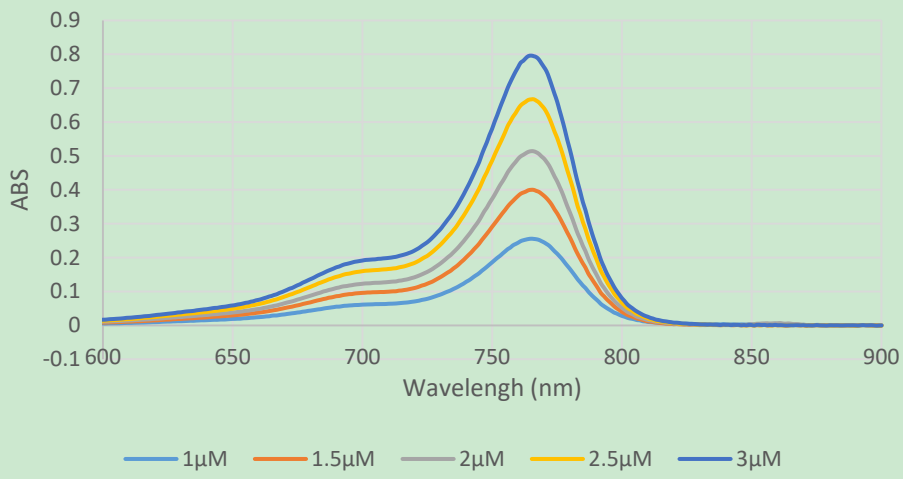

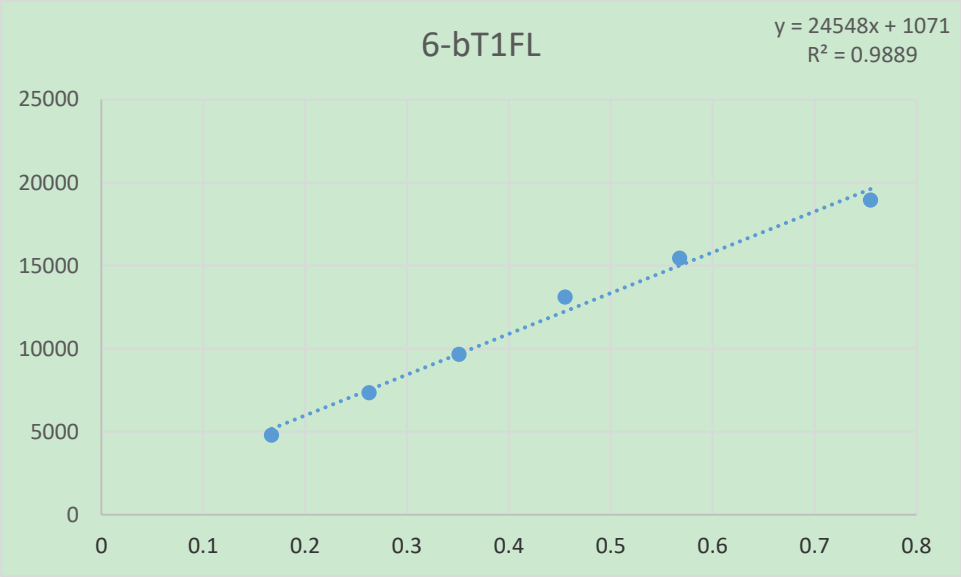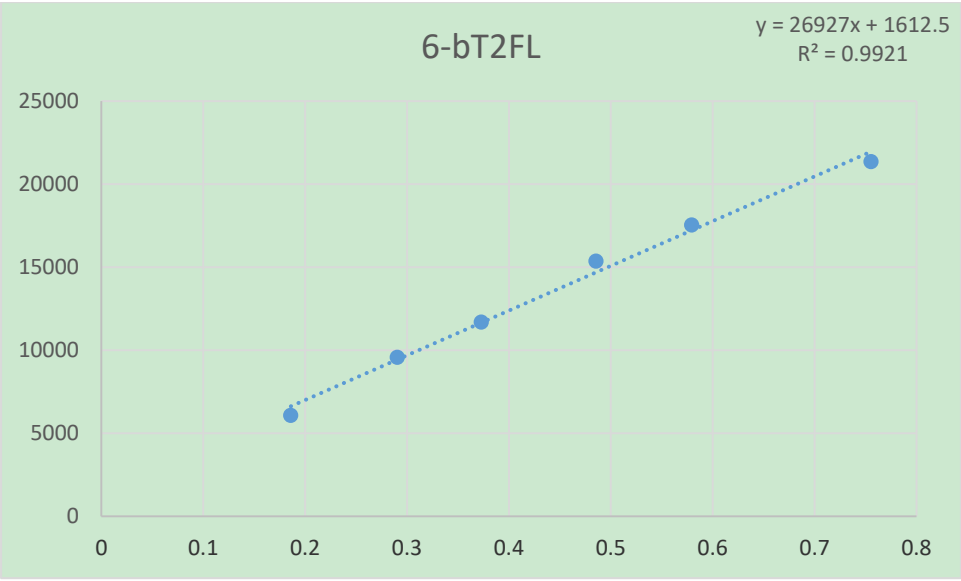



6-bT2 FL

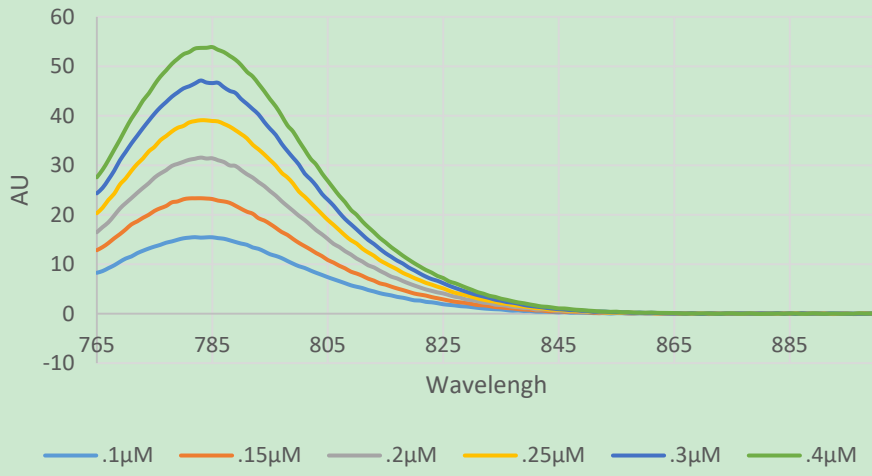

6-bT2 FL

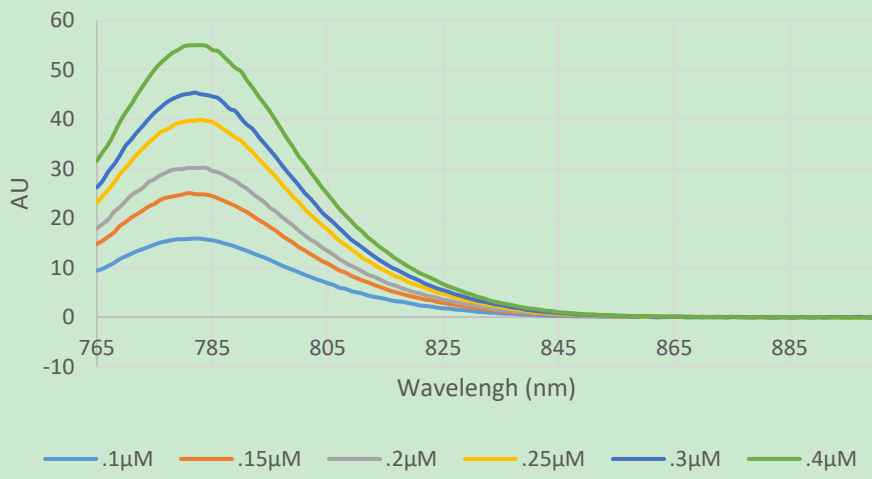

6-c T1 ABS

$y = 275238x - 0.0239$   
 $R^2 = 0.9972$

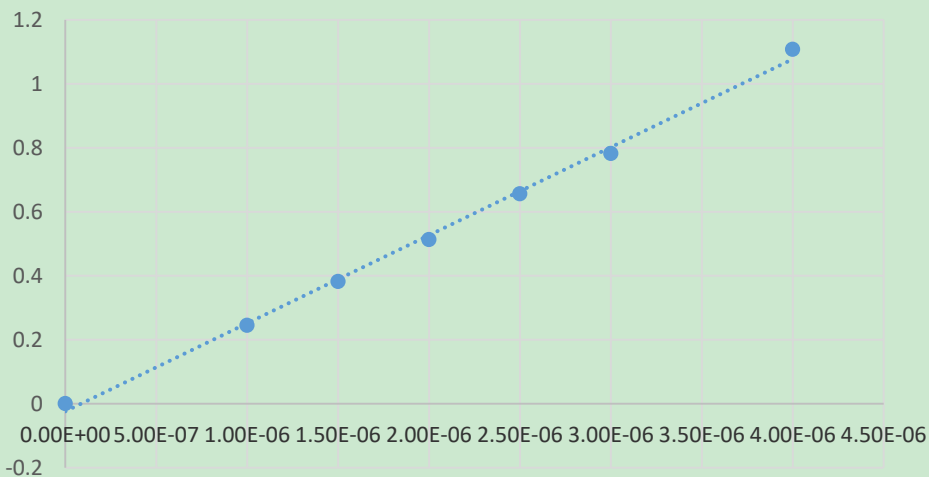

6-c T2 ABS

$y = 275952x - 0.001$   
 $R^2 = 0.9986$

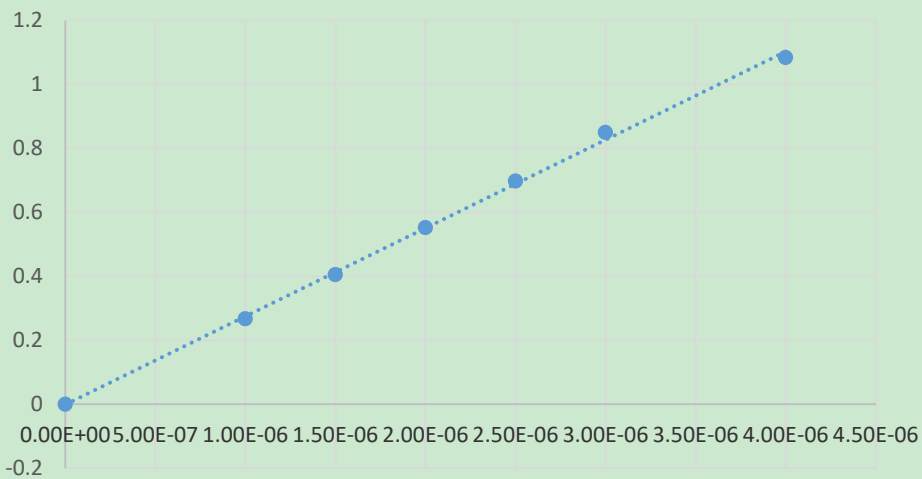

6-cT1 ABS

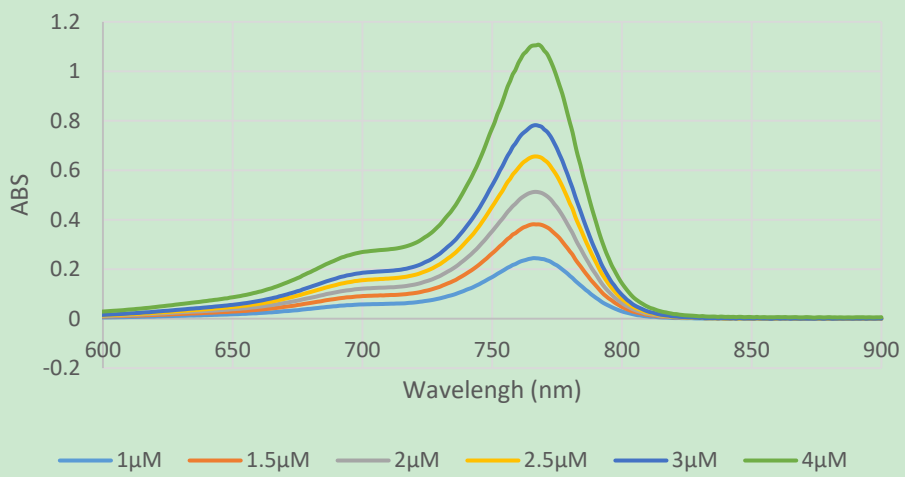

6-cT2 ABS

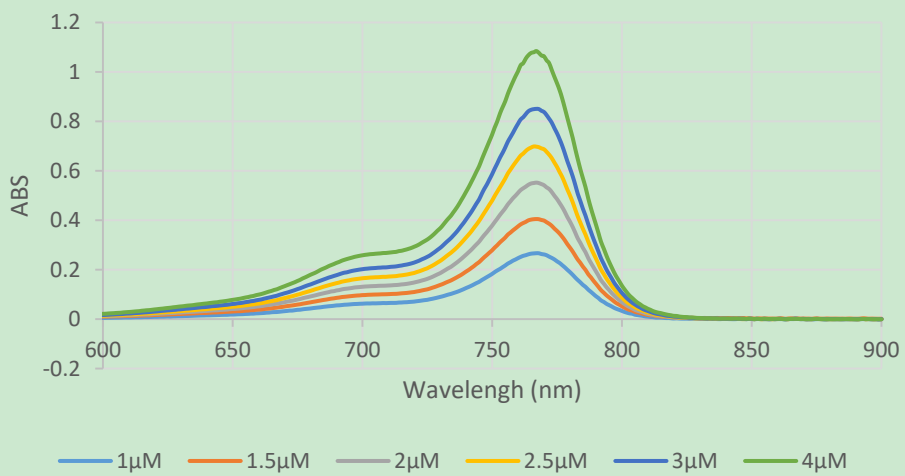

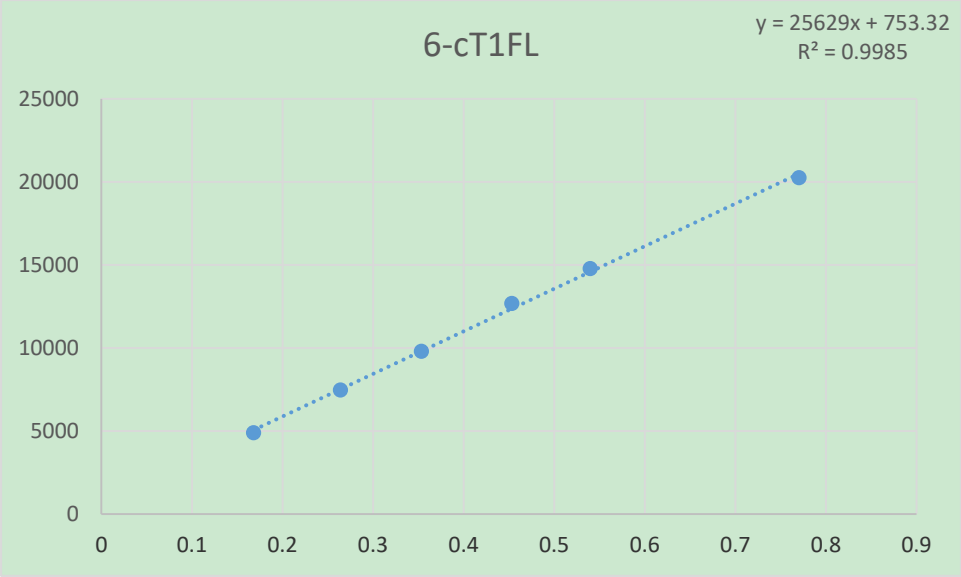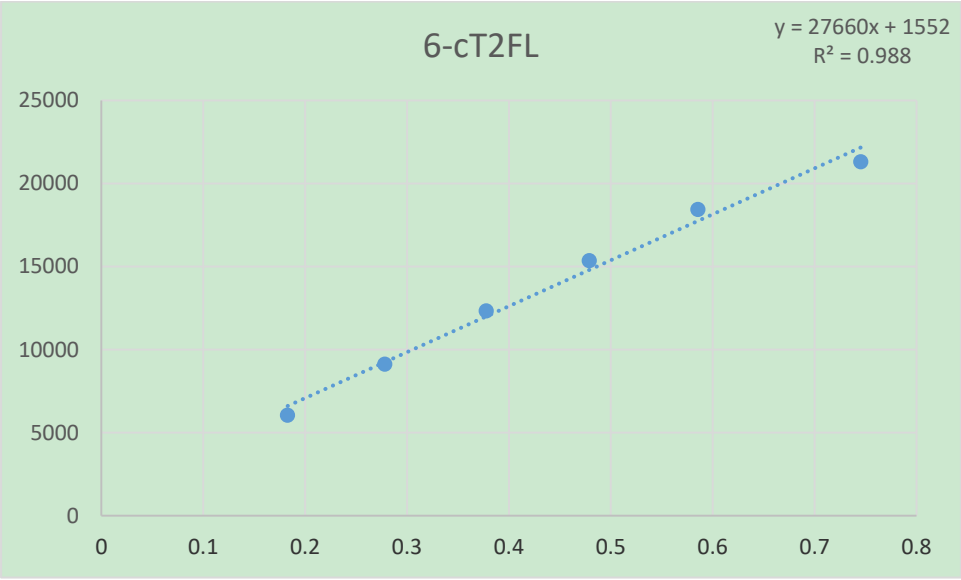

6-cT1 FL

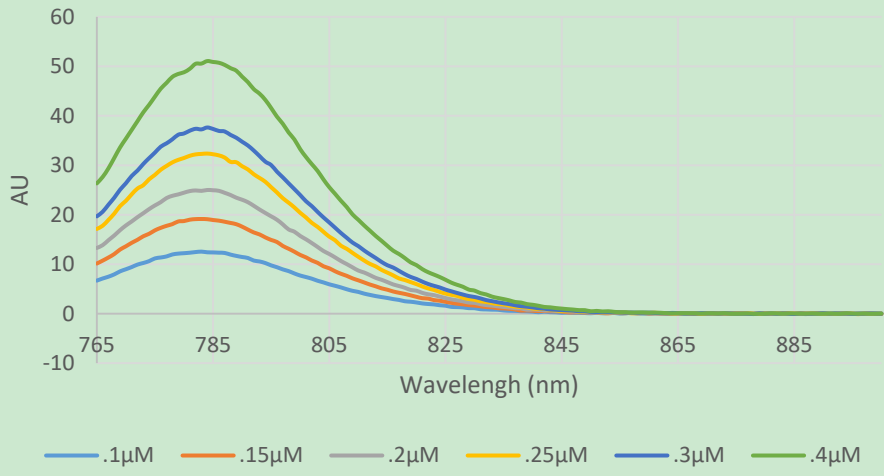

6-c T2 FL

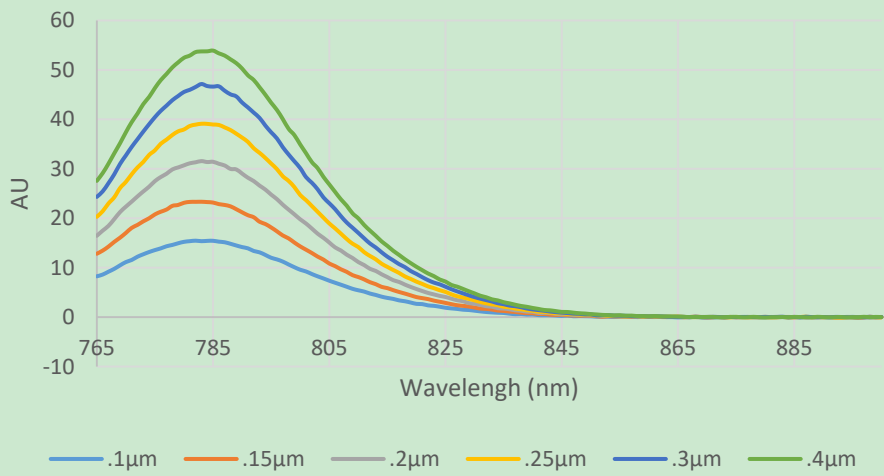

6-dT1 abs

$y = 245739x - 0.0068$   
 $R^2 = 0.9998$

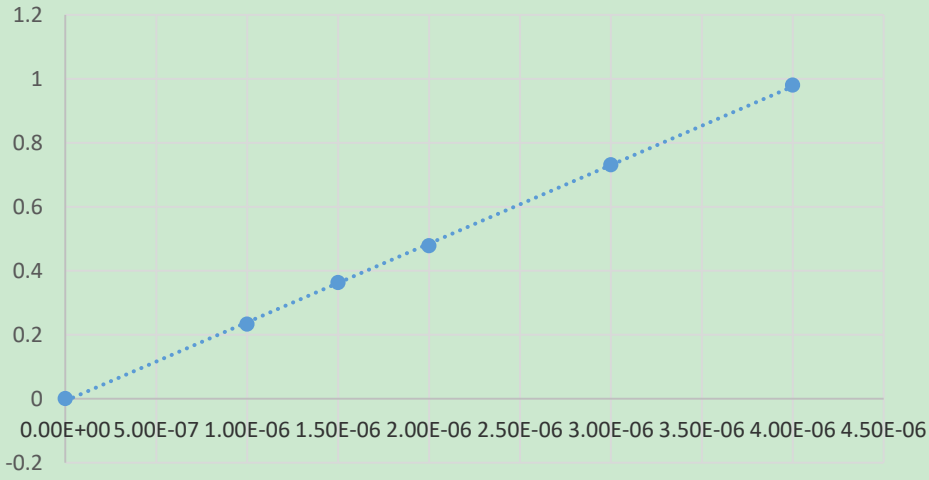

6-d t2 abs

$y = 254000x - 0.0076$   
 $R^2 = 0.9989$

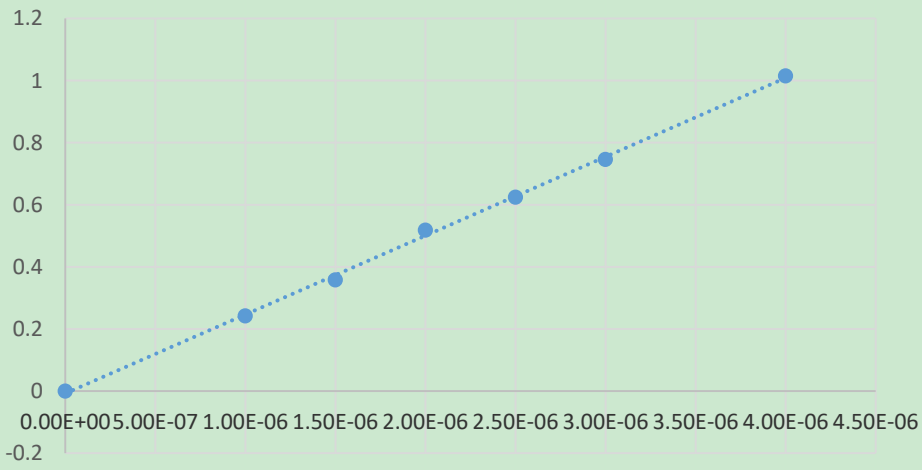

6-d T1 ABS

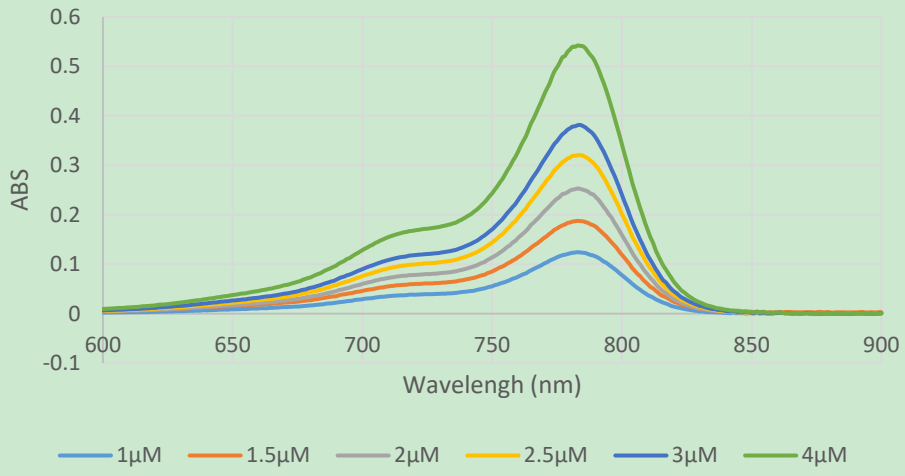

6-d T2 ABS

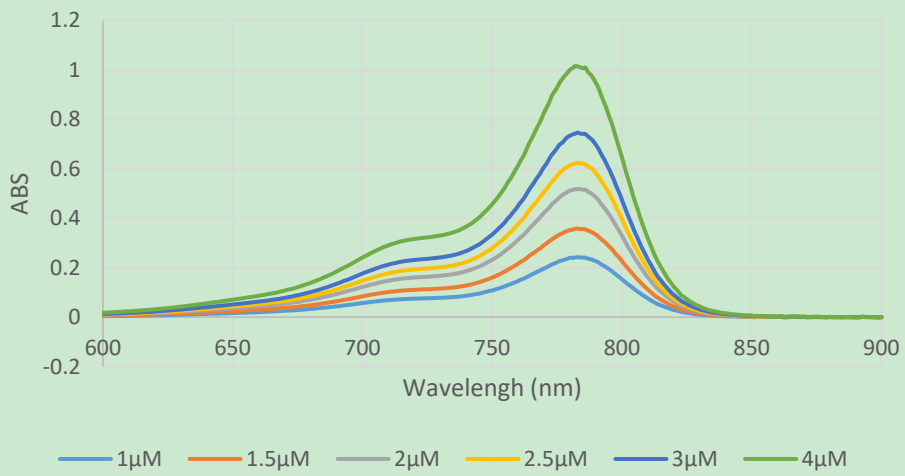

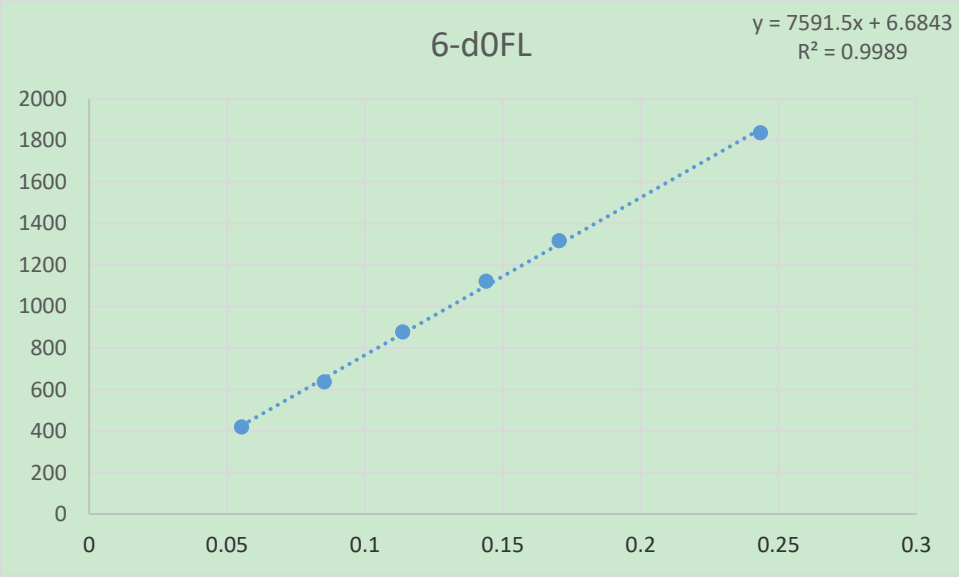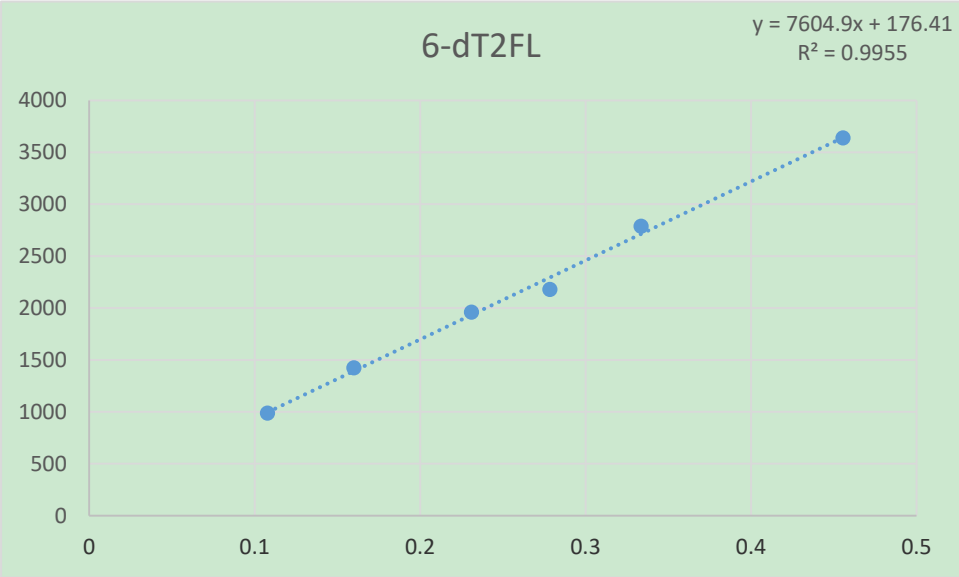



6-dT1 FL

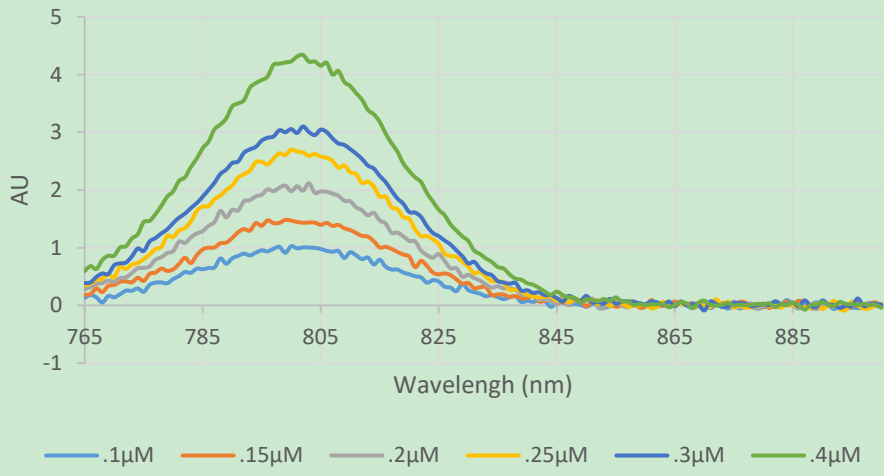

6-dT2 FL

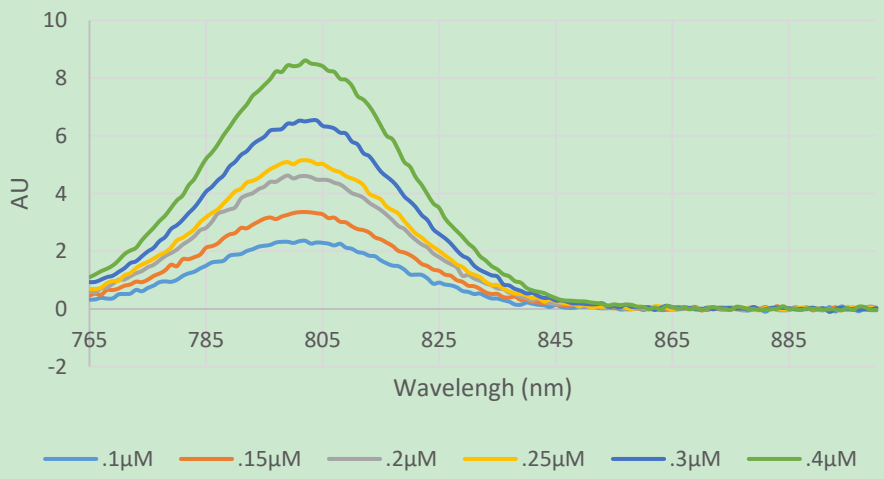

6-eT1 abs

$y = 251057x + 0.0006$   
 $R^2 = 0.9996$

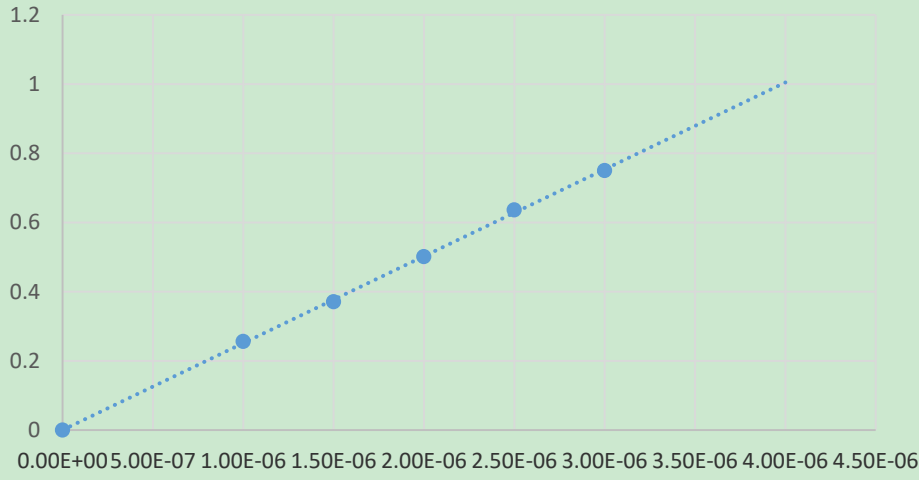

6-eT2 abs

$y = 259686x - 0.0091$   
 $R^2 = 0.9977$

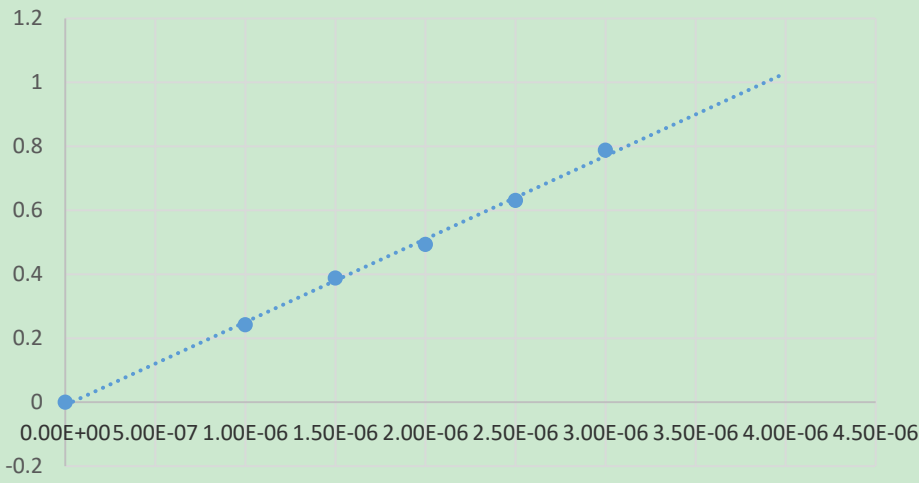

6-eT1 ABS

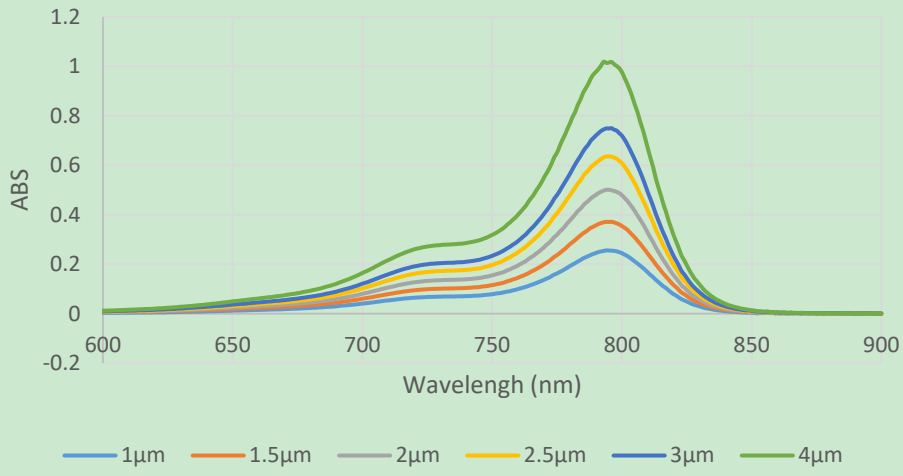

6-eT2 ABS

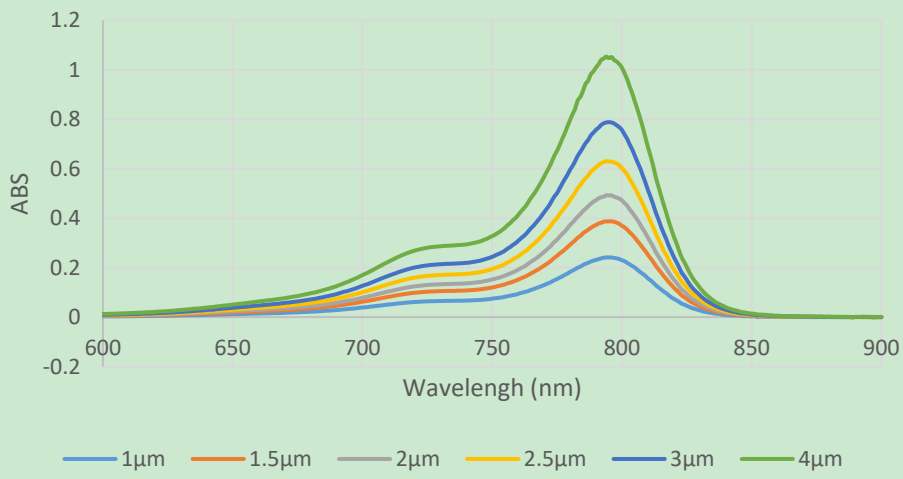

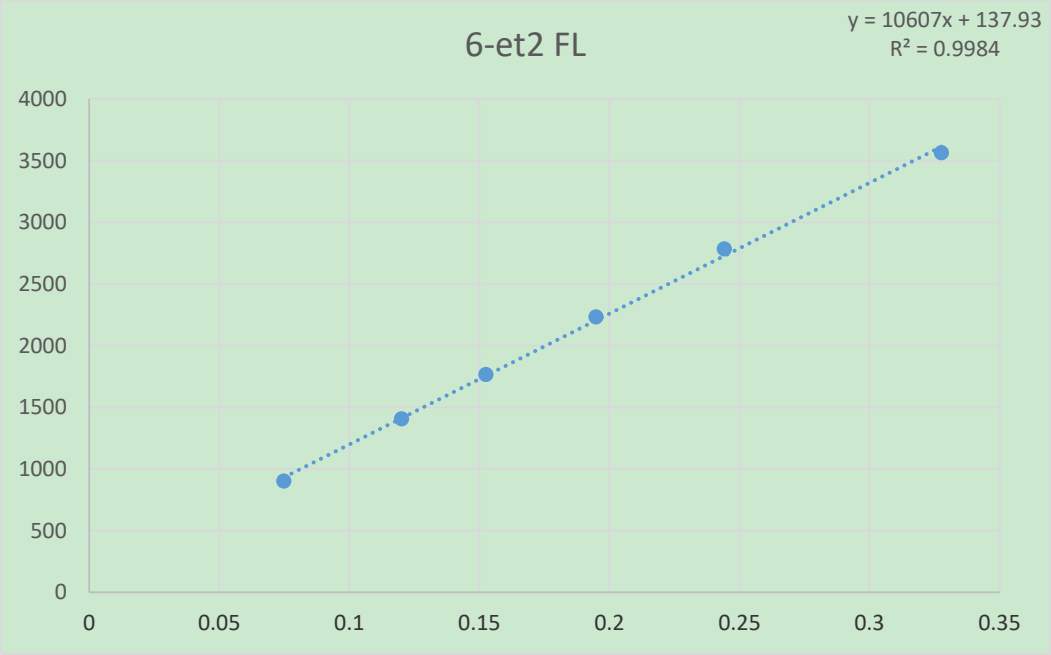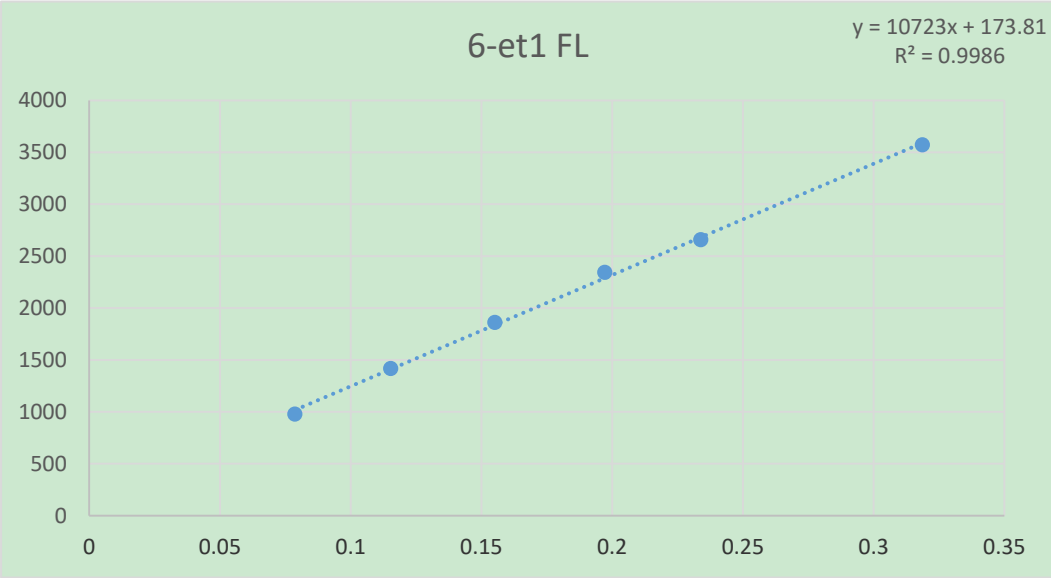

6-eT1 FL

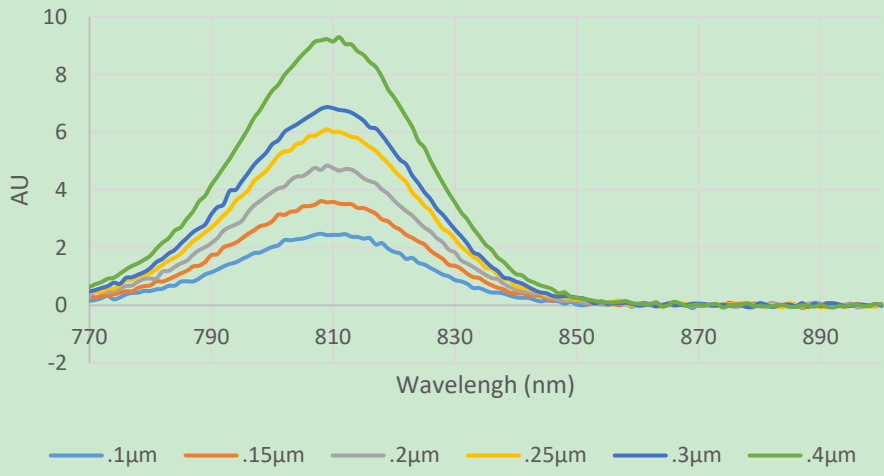

6-eFL

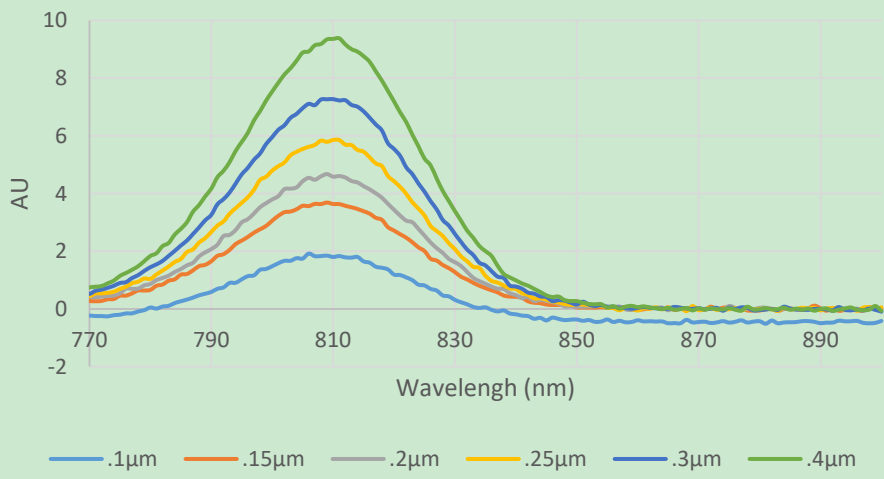

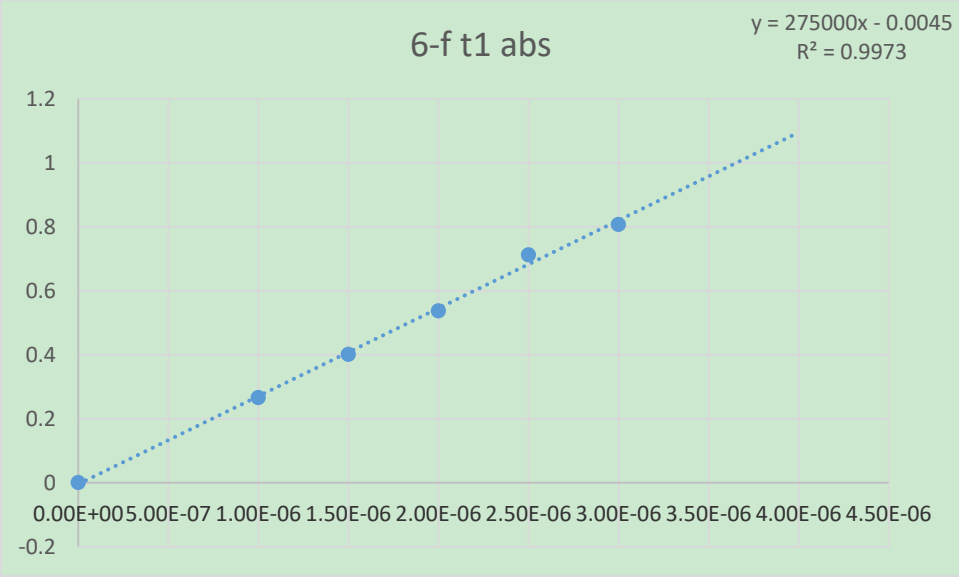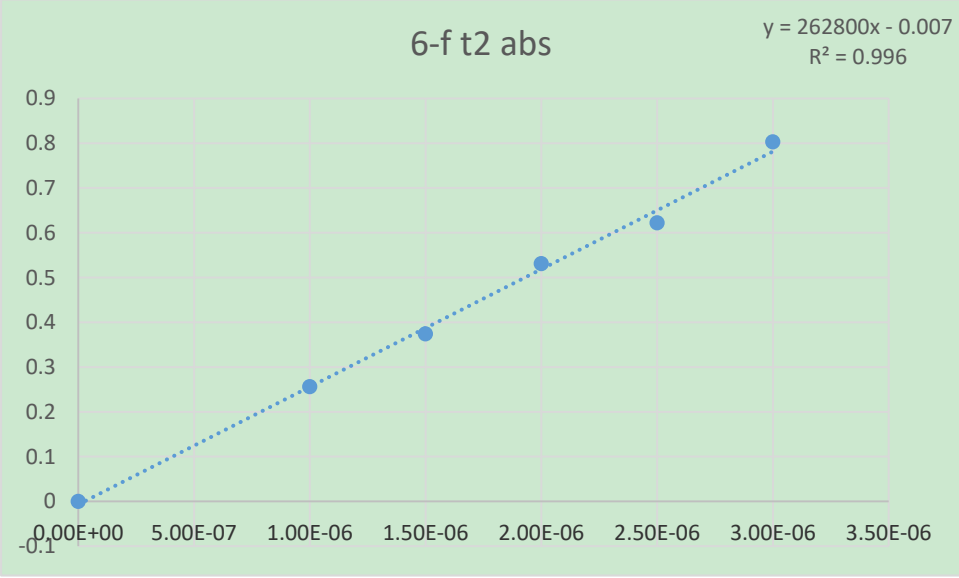

6-f T1 ABS

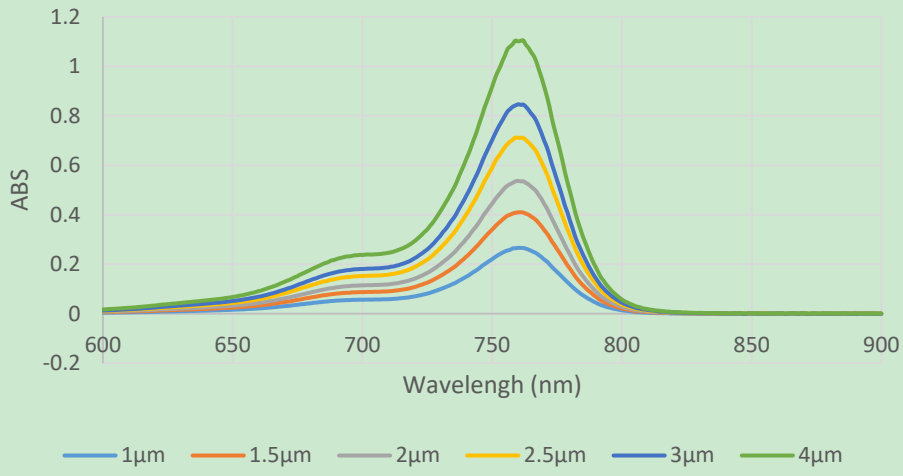

6-f T2 ABS

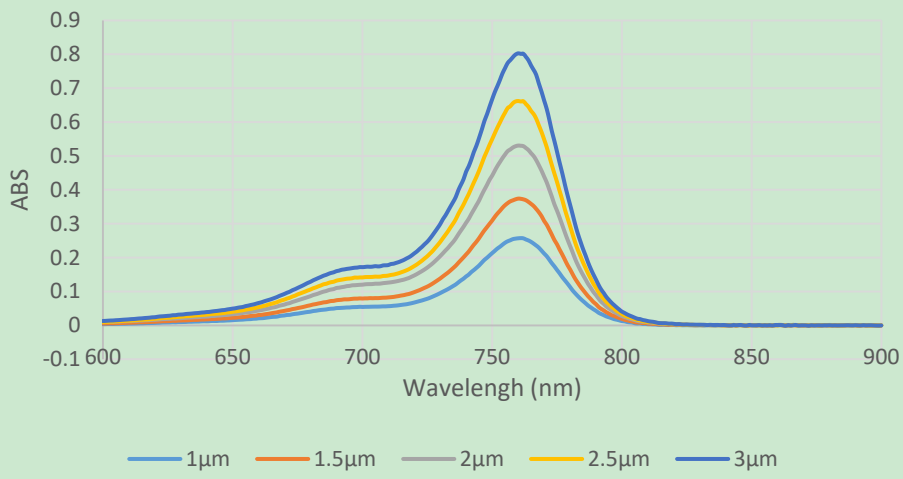

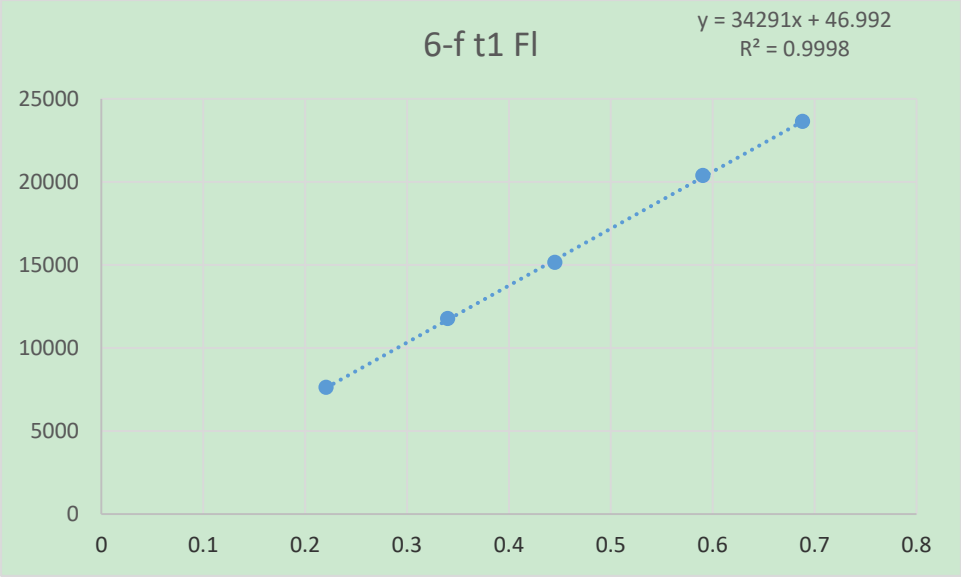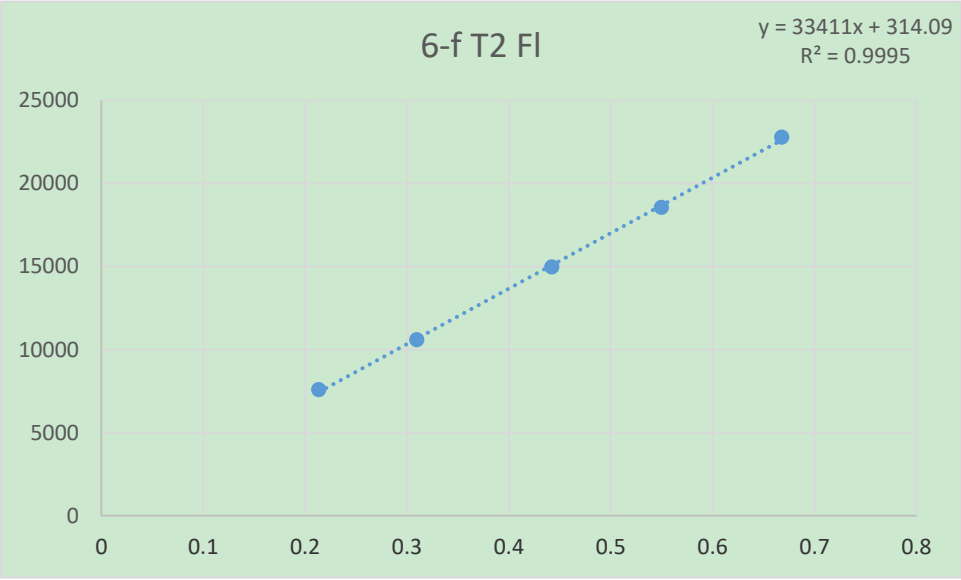



### 6-f T1 FL

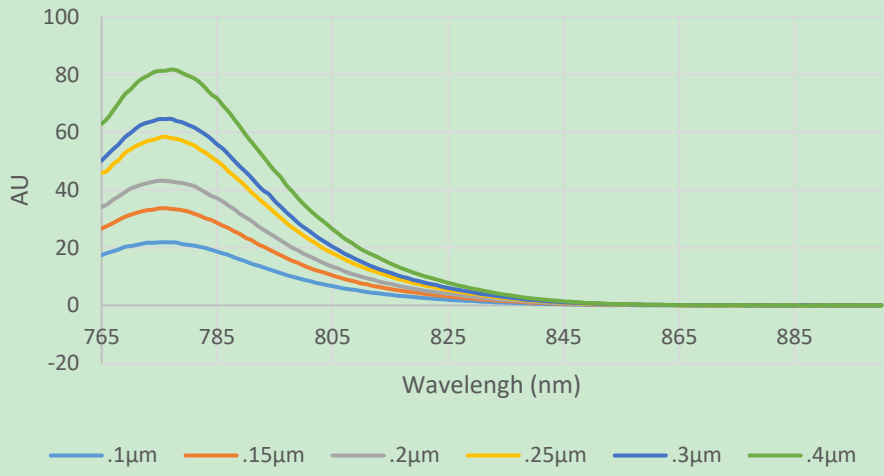

### 6-f T2 FL

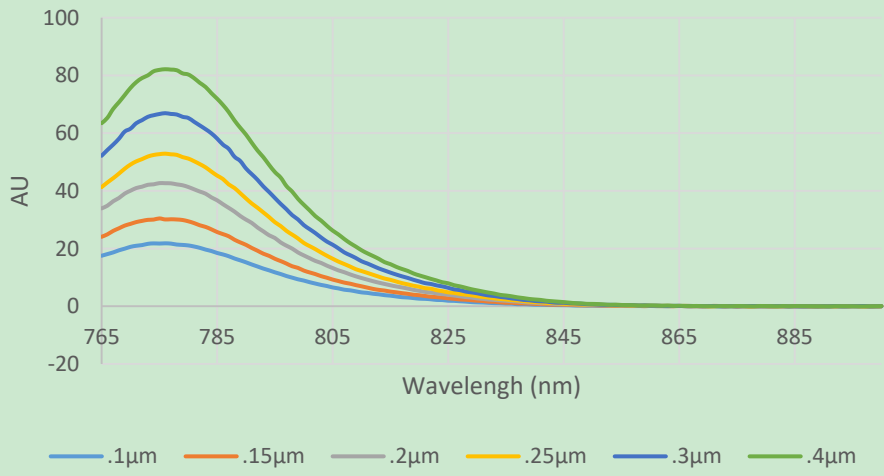

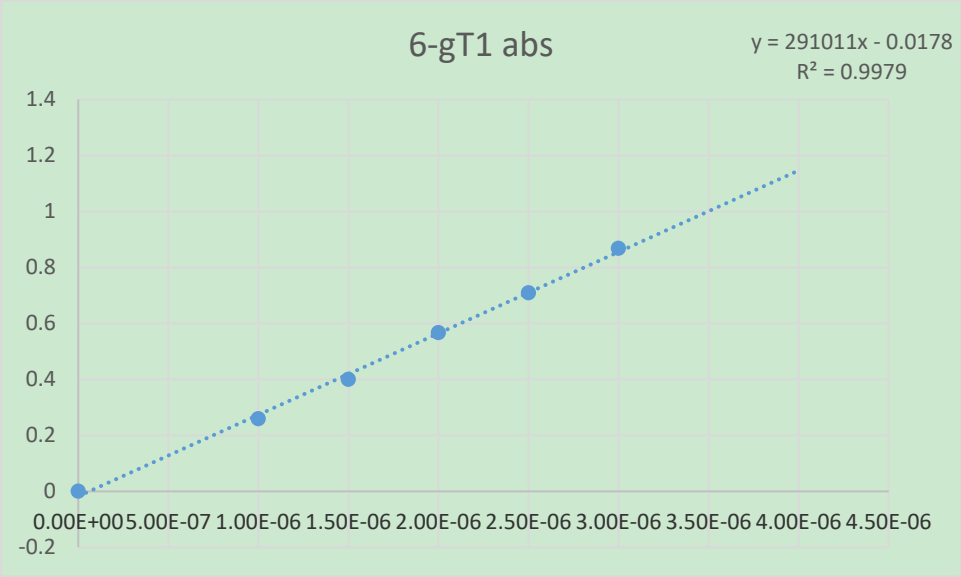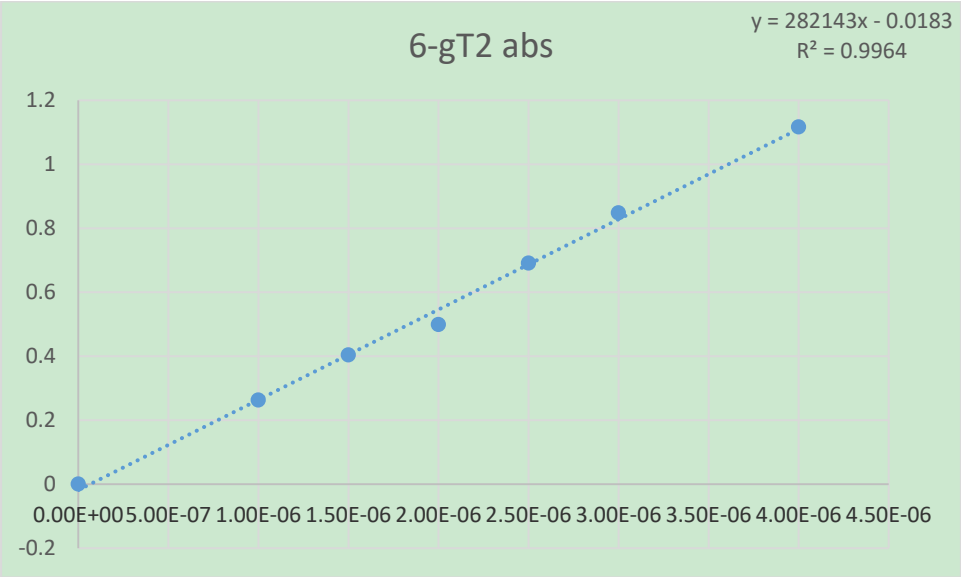

6-gT1 ABS

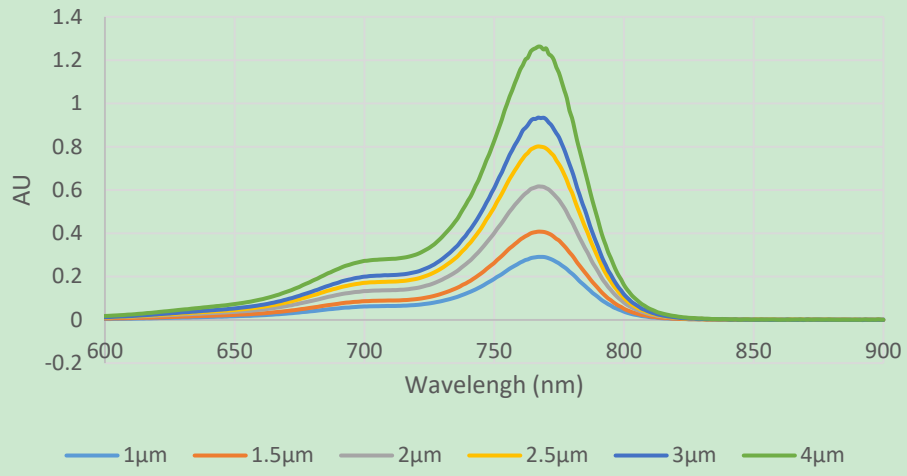

6-gT2 ABS

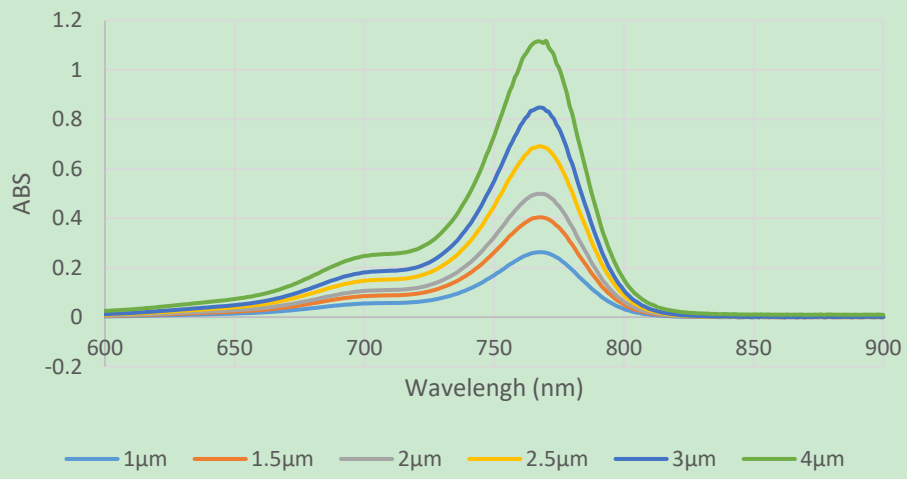

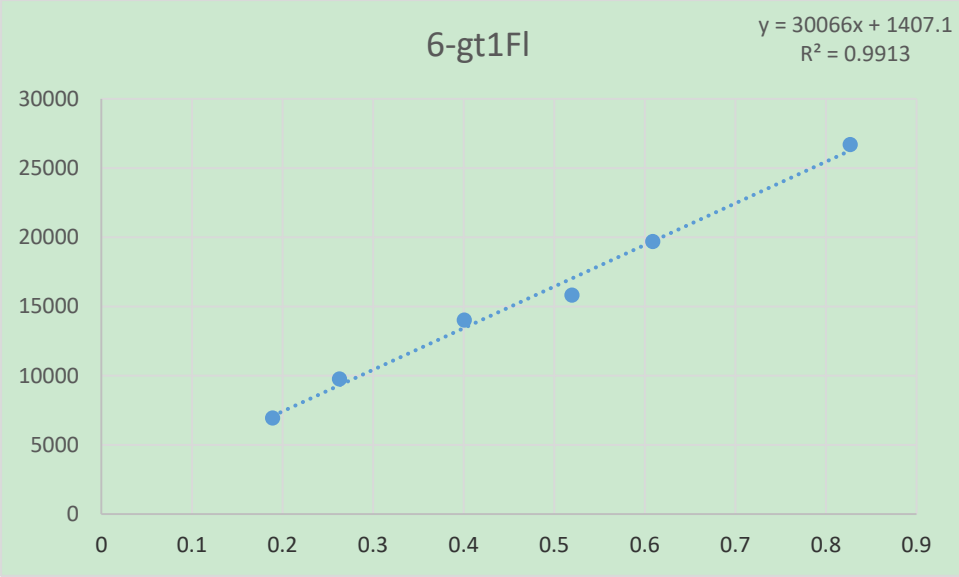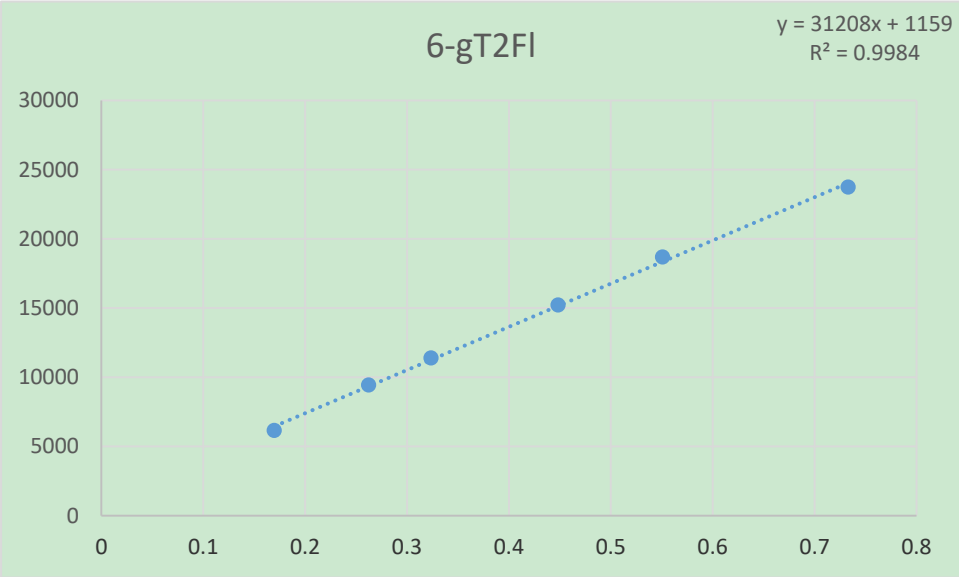

6-gT1 FL

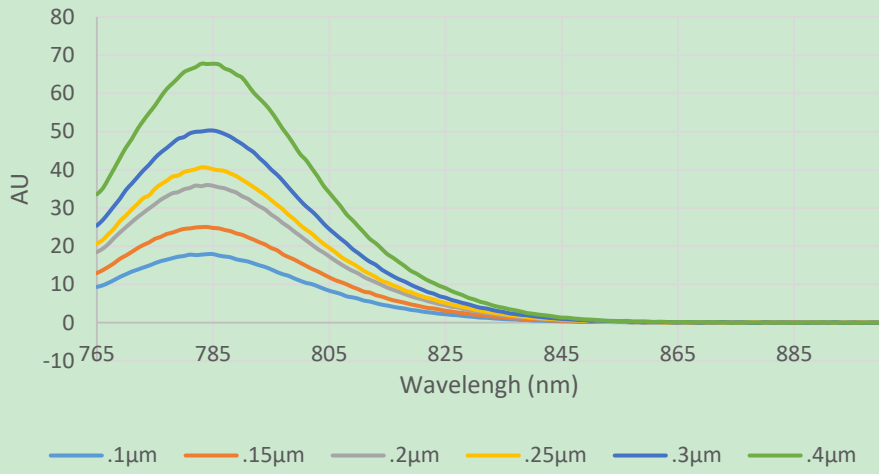

6-gT2 FL

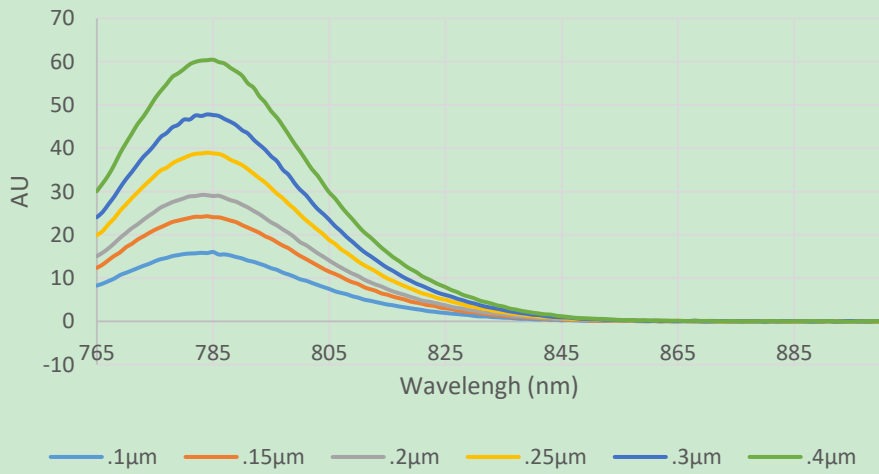

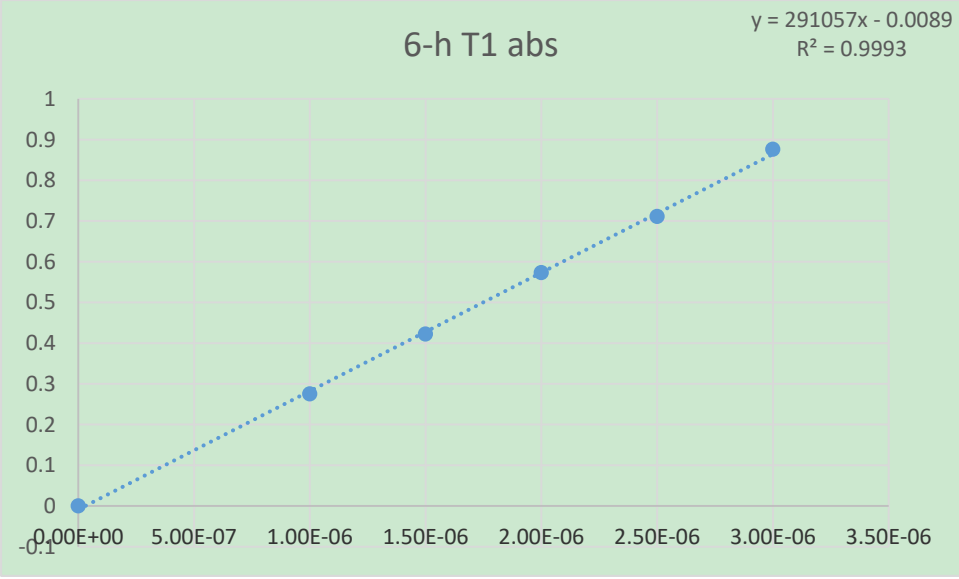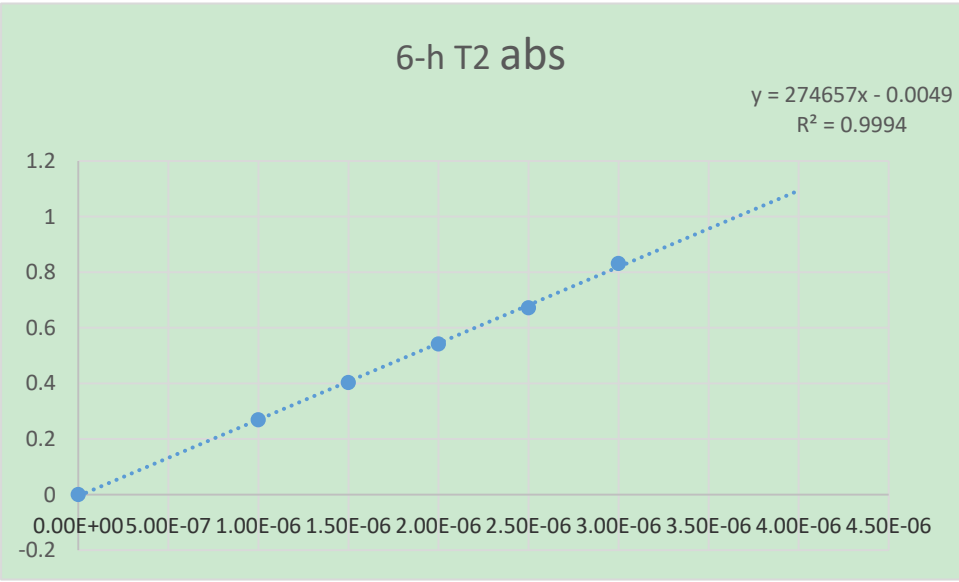

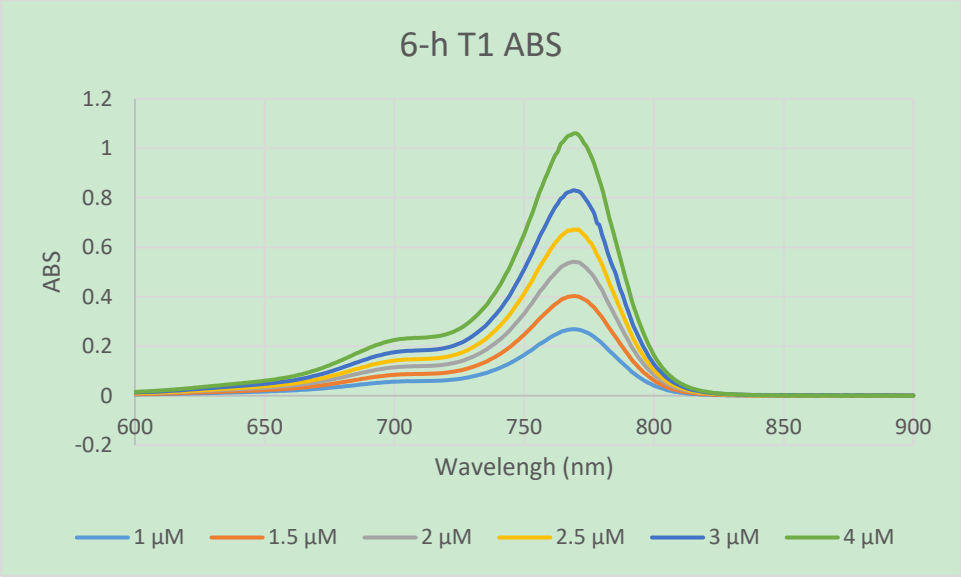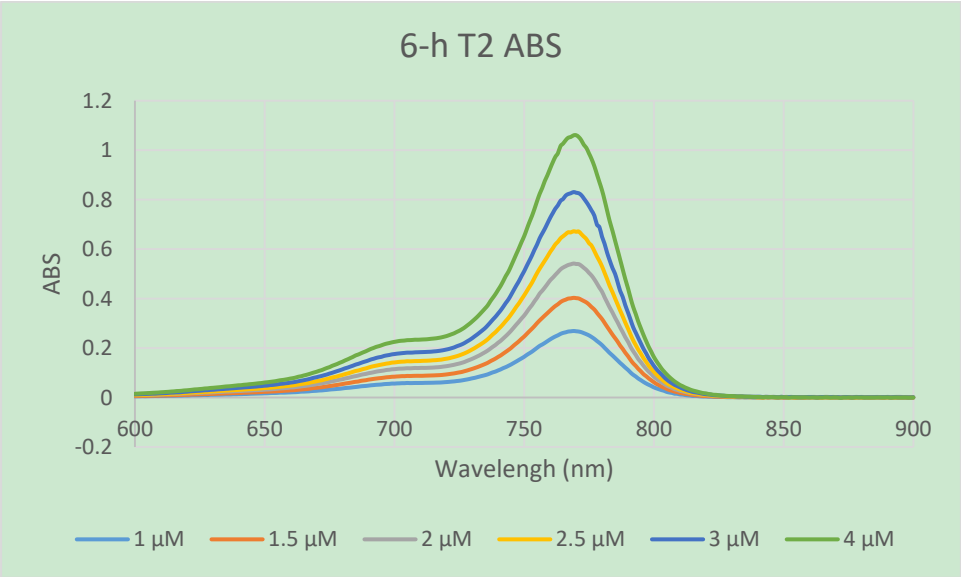

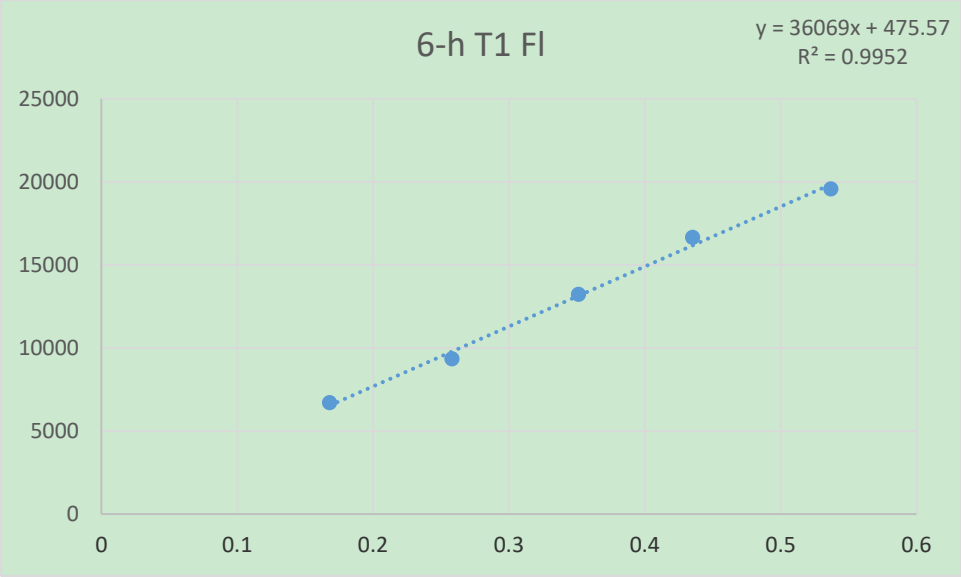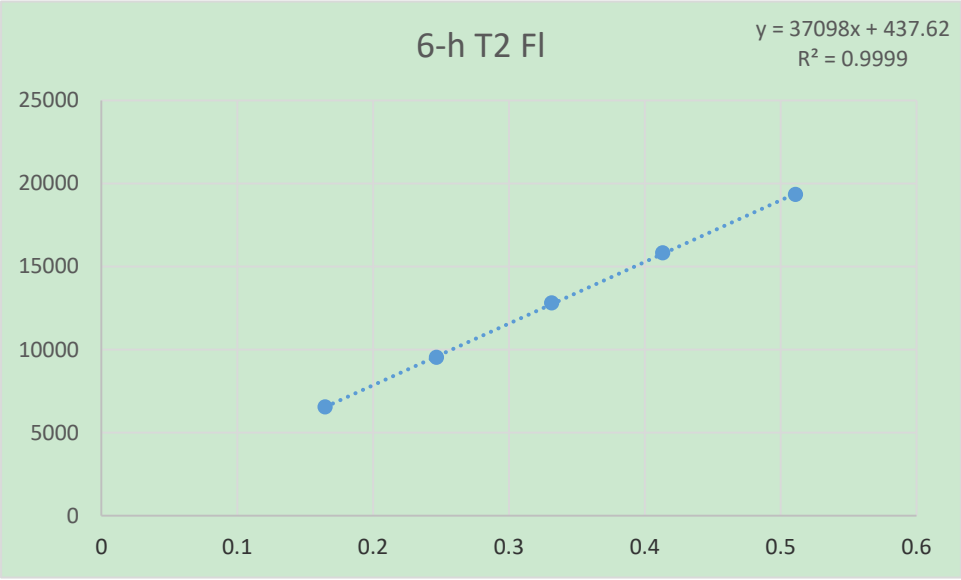



6-h T1 FL

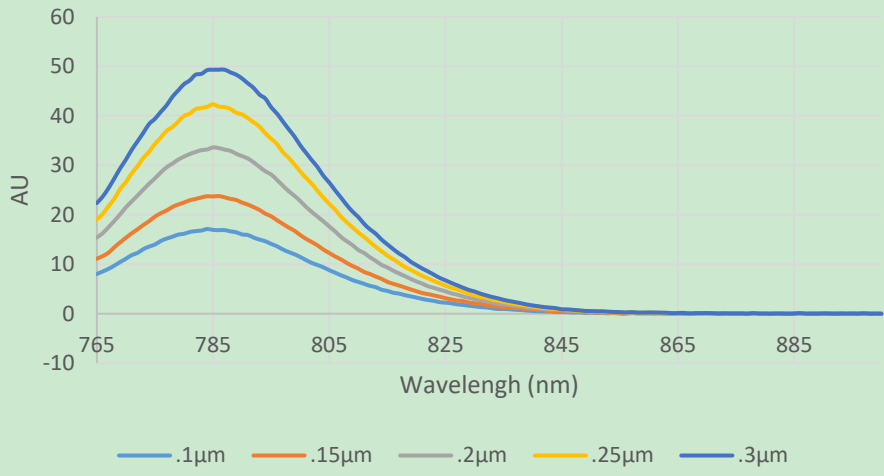

6-h T2 FL

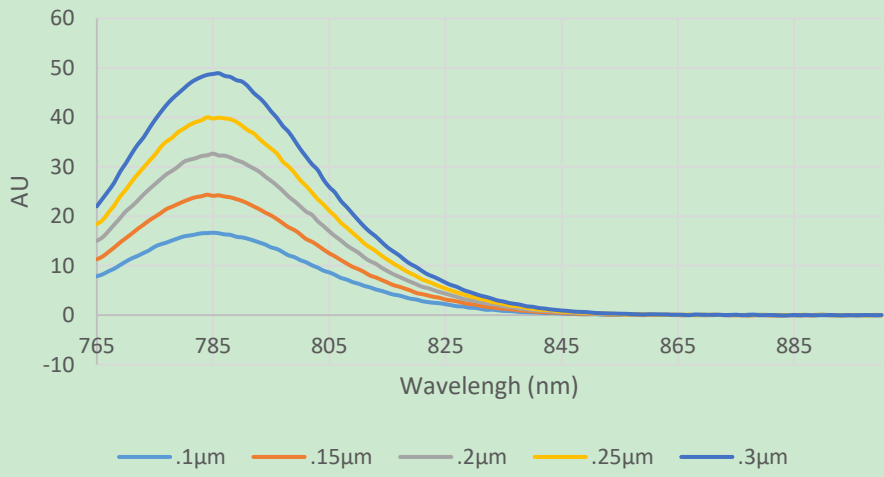

### 6-i T1 abs

$$y = 139905x - 0.0197$$
$$R^2 = 0.9949$$

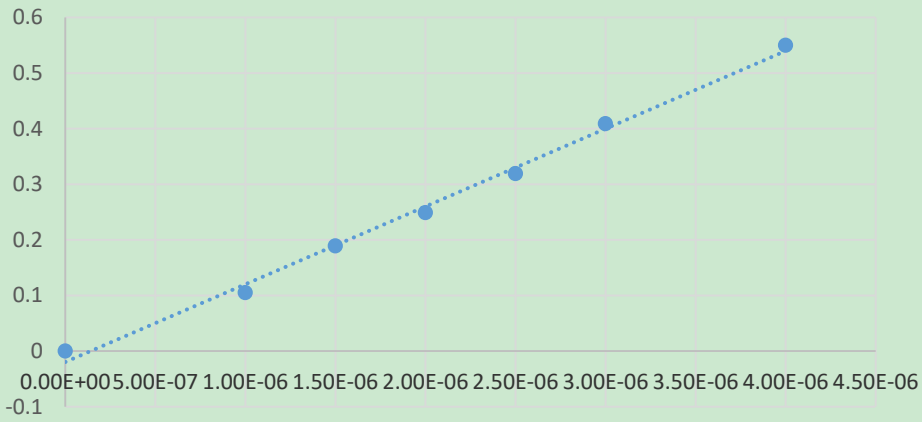

### 6-i T2 abs

$$y = 147190x - 0.0178$$
$$R^2 = 0.9952$$

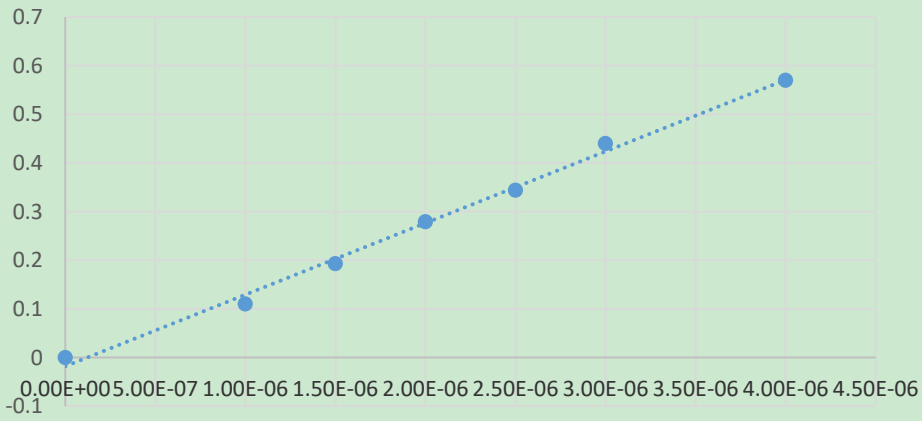

6-i T1 ABS

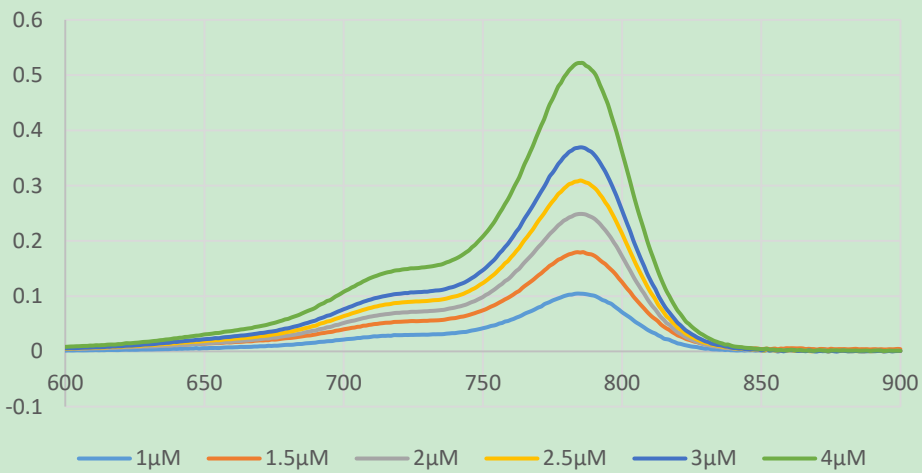

6-i T2 ABS

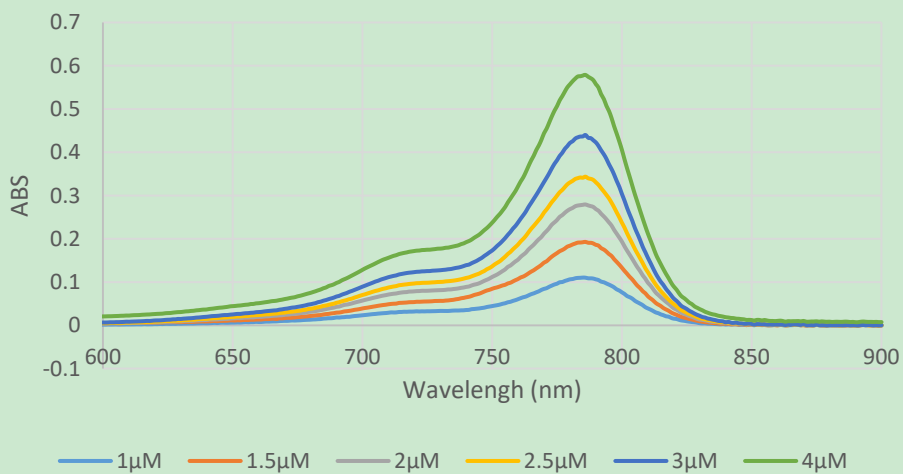

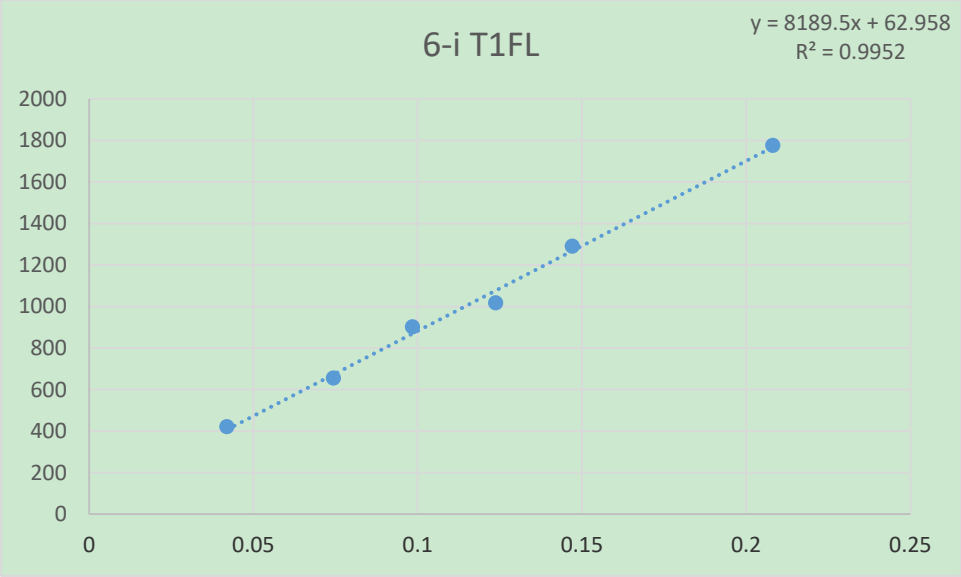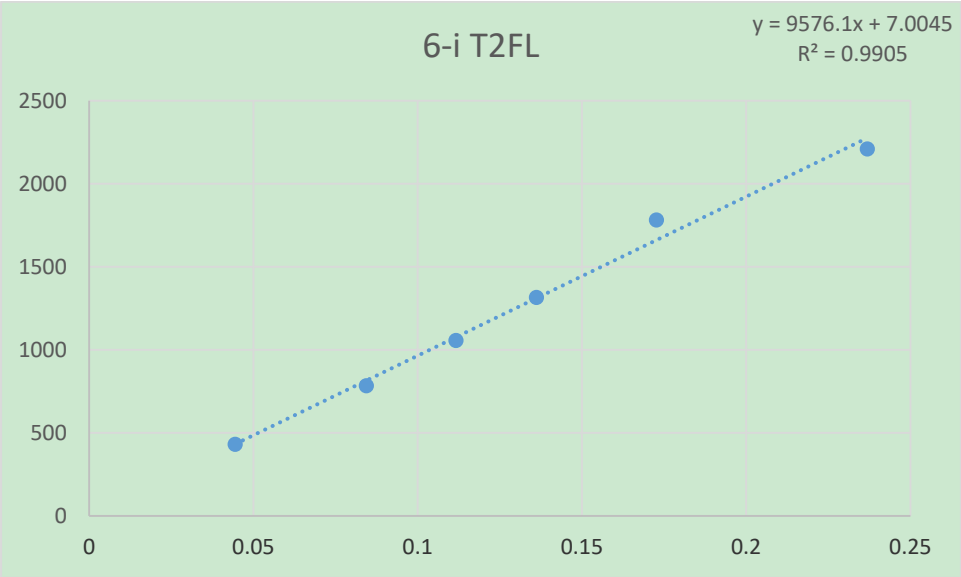

6-i T1 FL

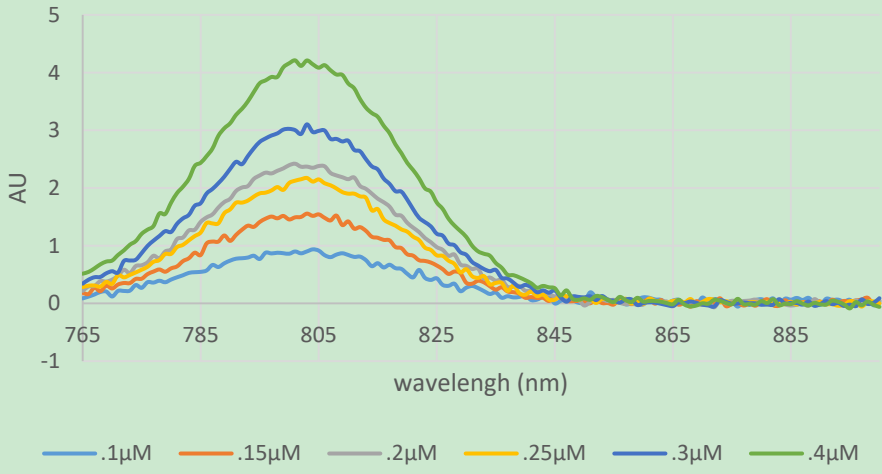

6-i T2 FL

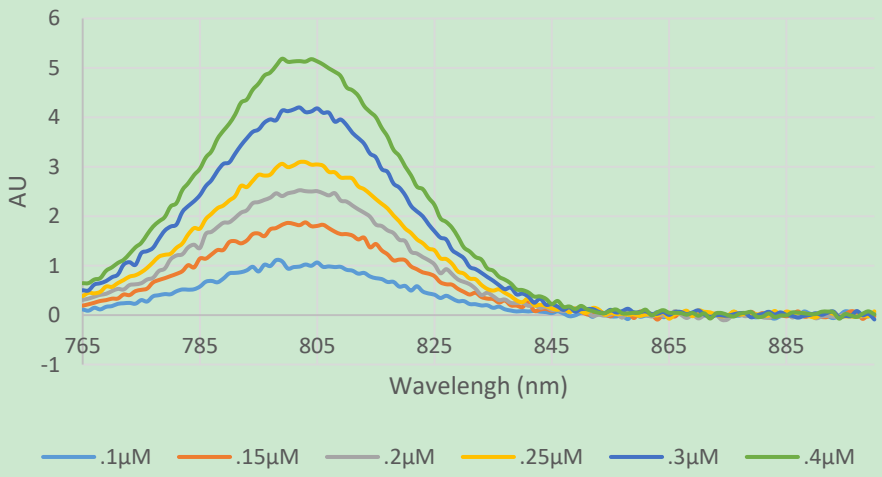

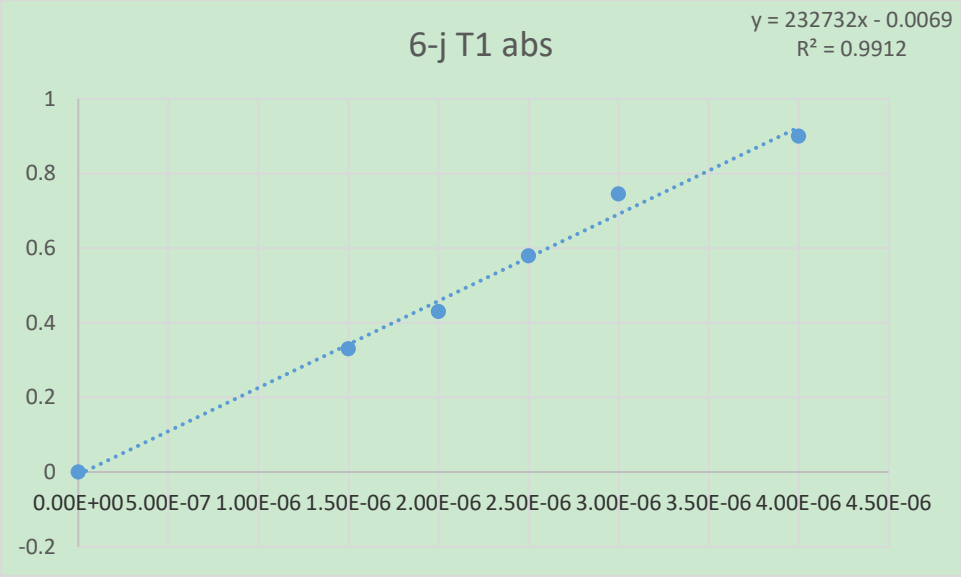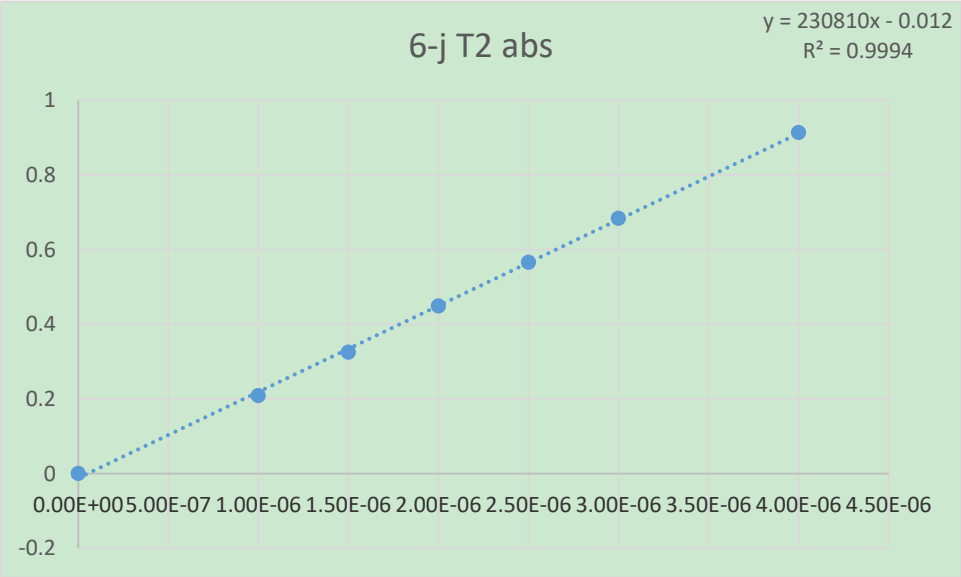

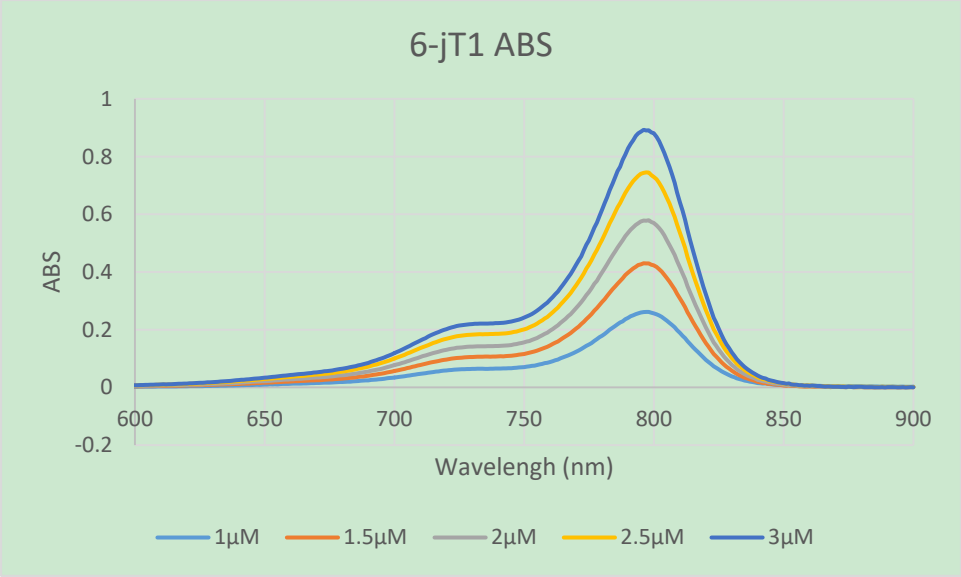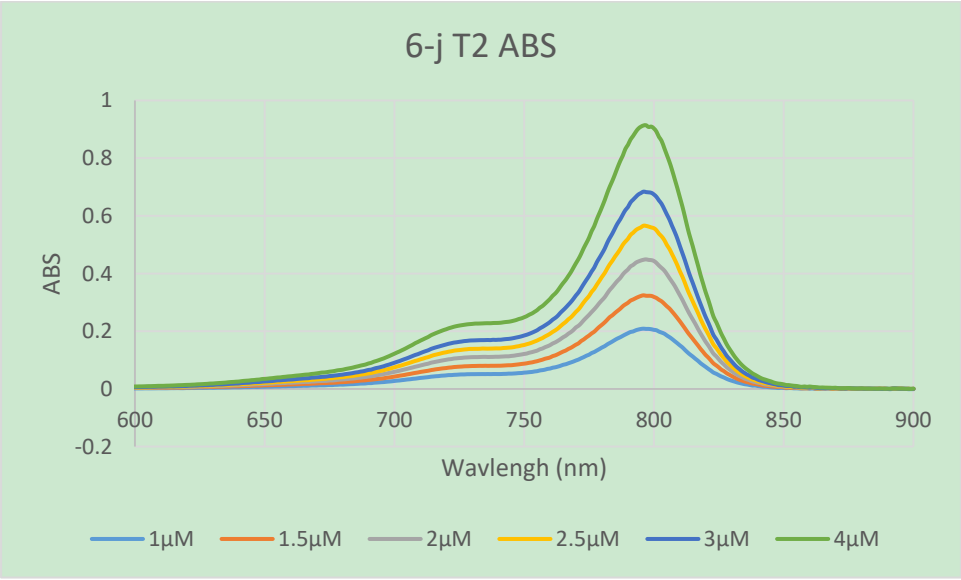

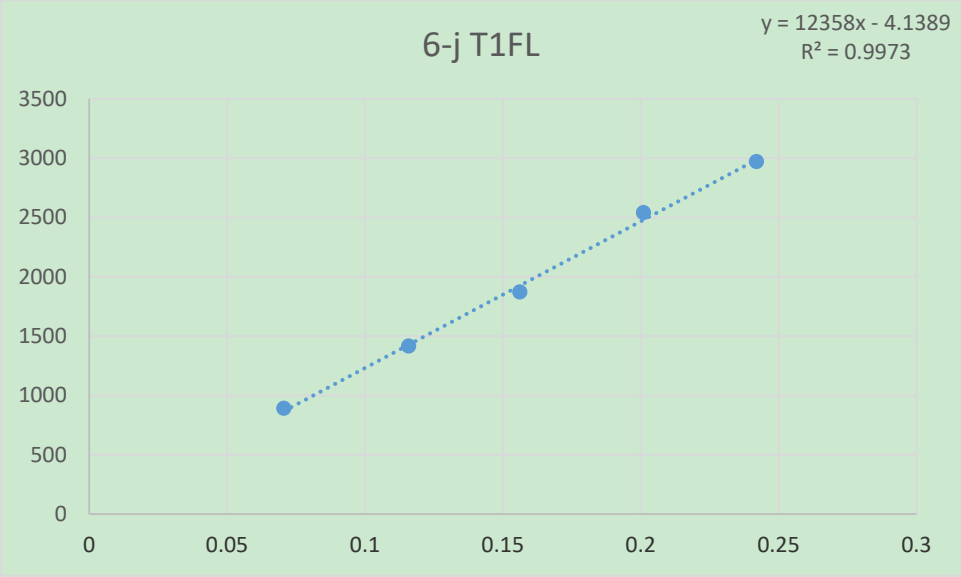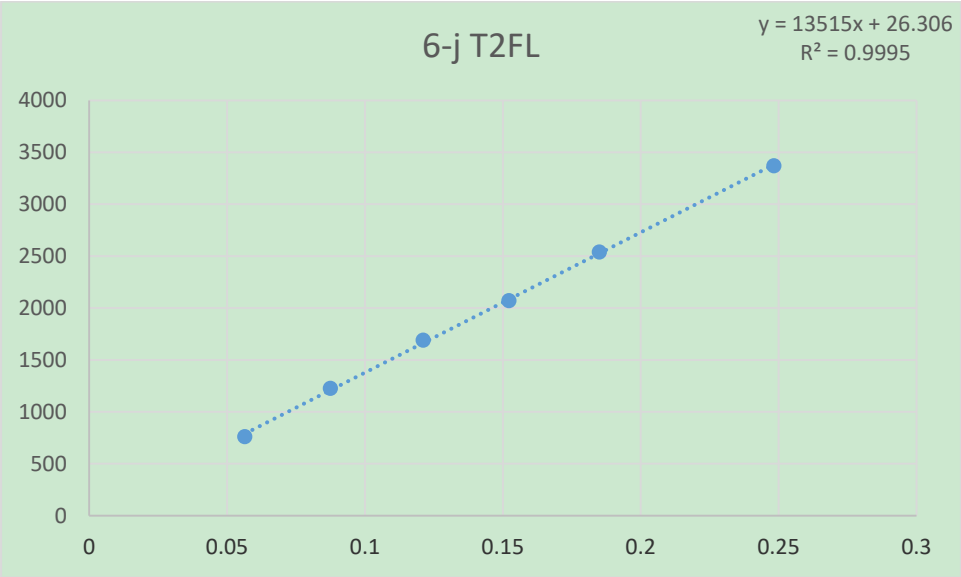



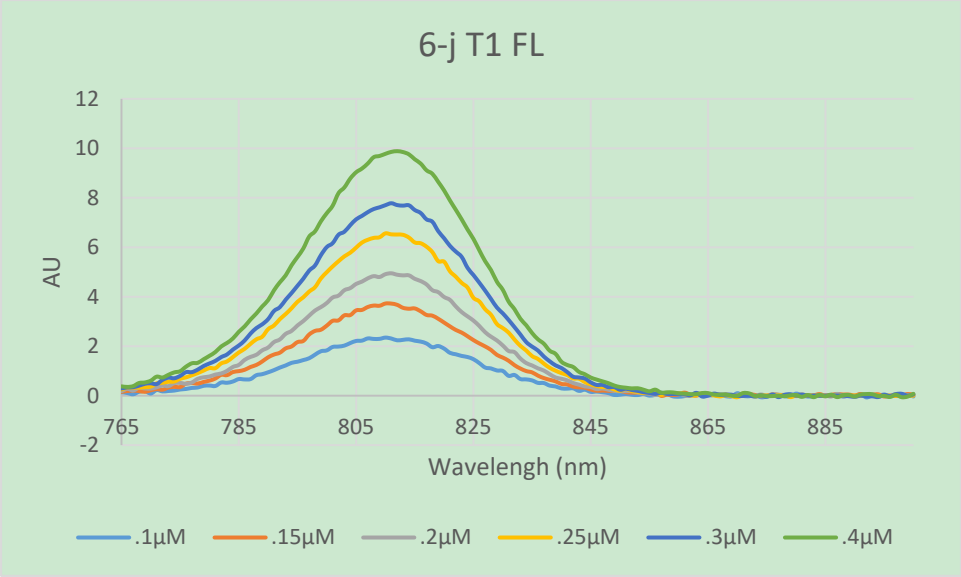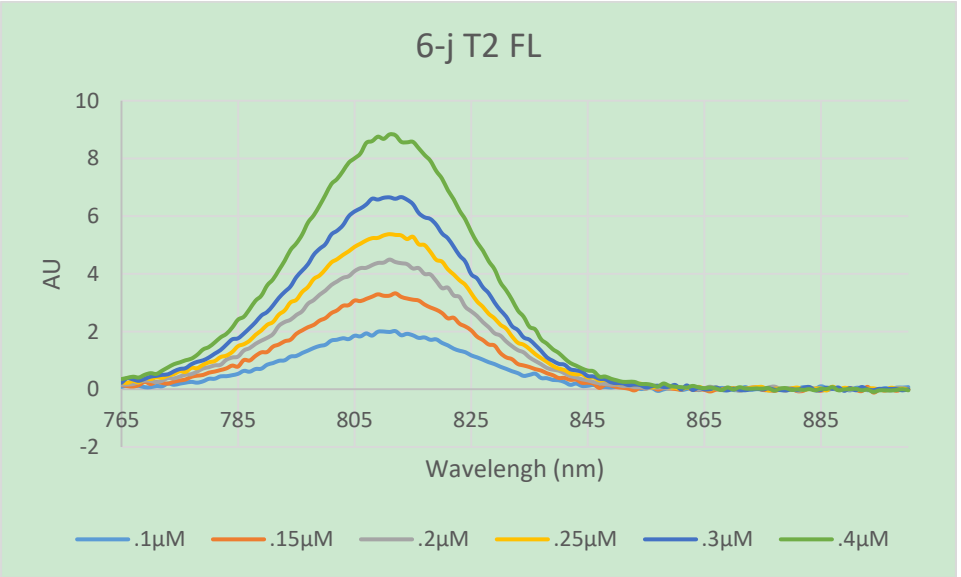

6-k T1 abs

$$y = 202381x - 0.0009$$
$$R^2 = 0.9989$$

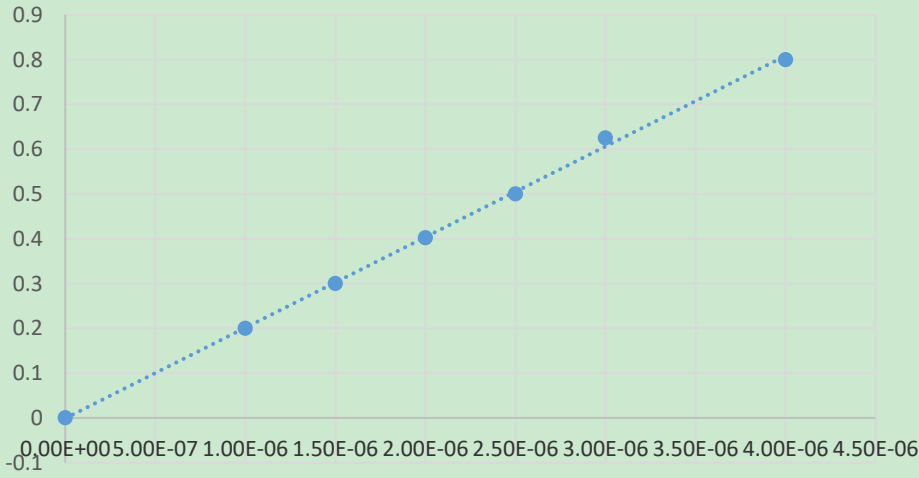

6-k T2 abs

$$y = 196952x - 0.0016$$
$$R^2 = 0.9996$$

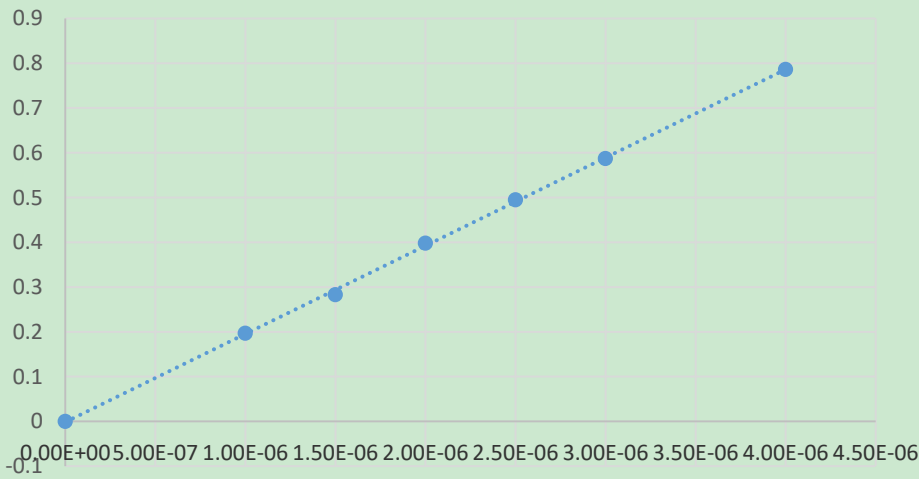

6-k T1 ABS

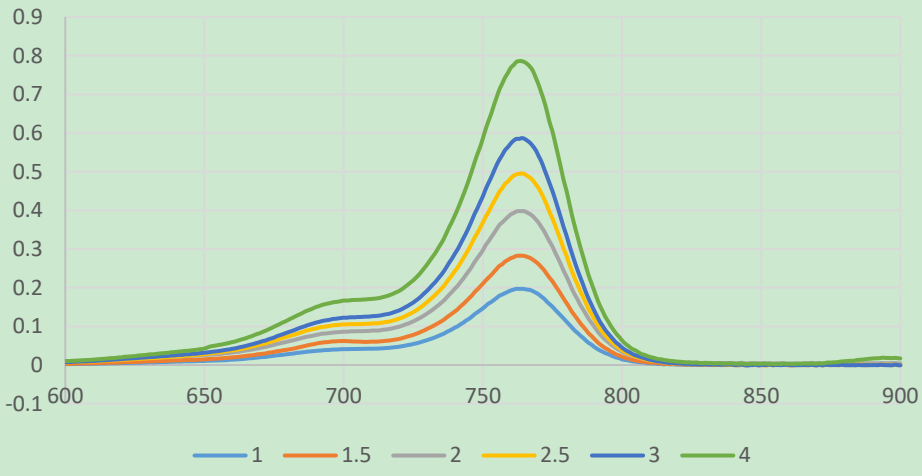

6-k T2 ABS

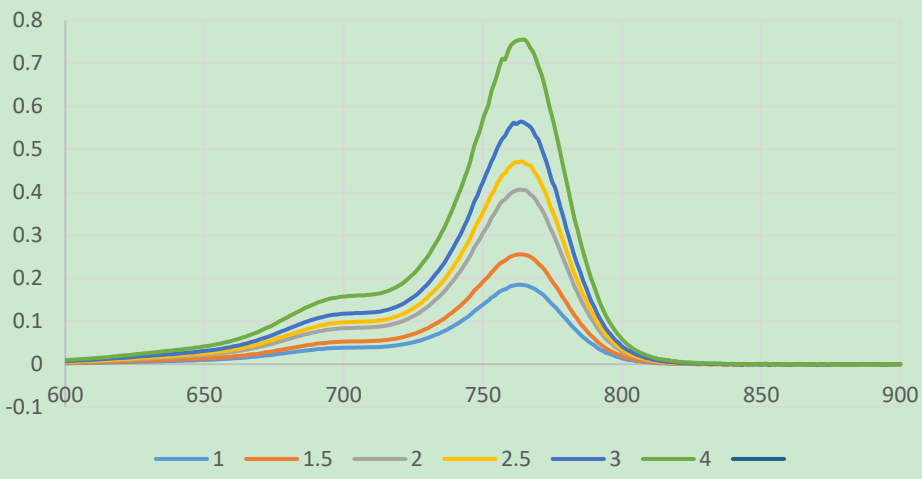

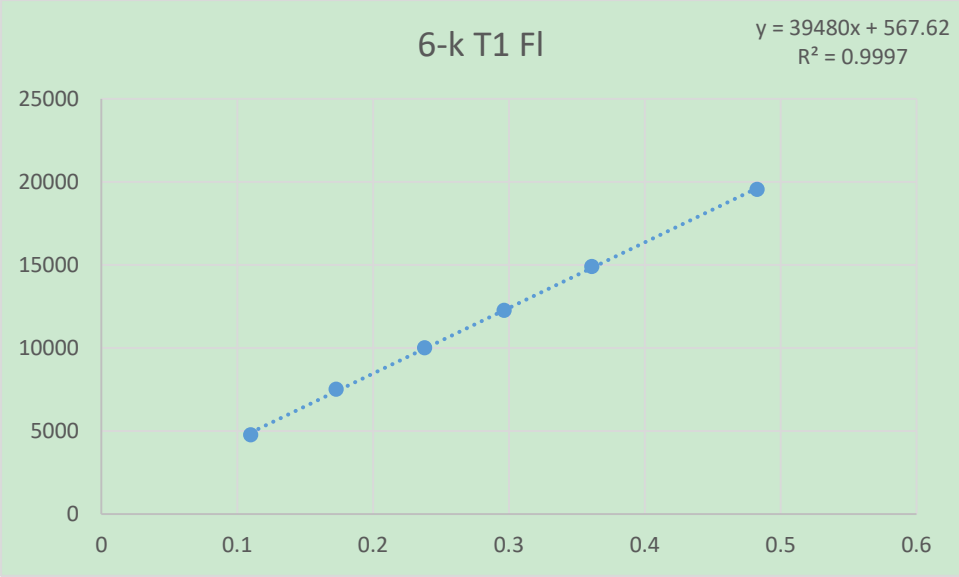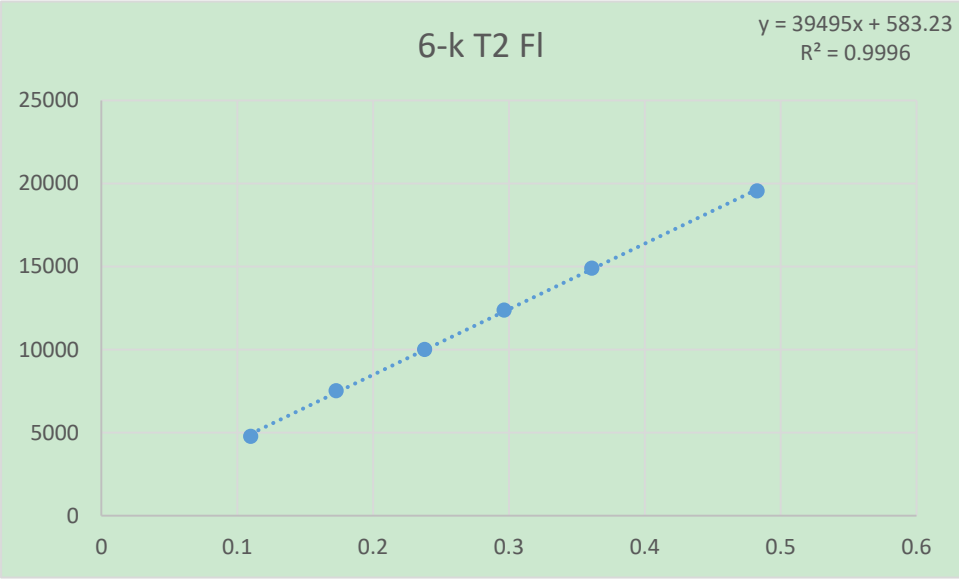

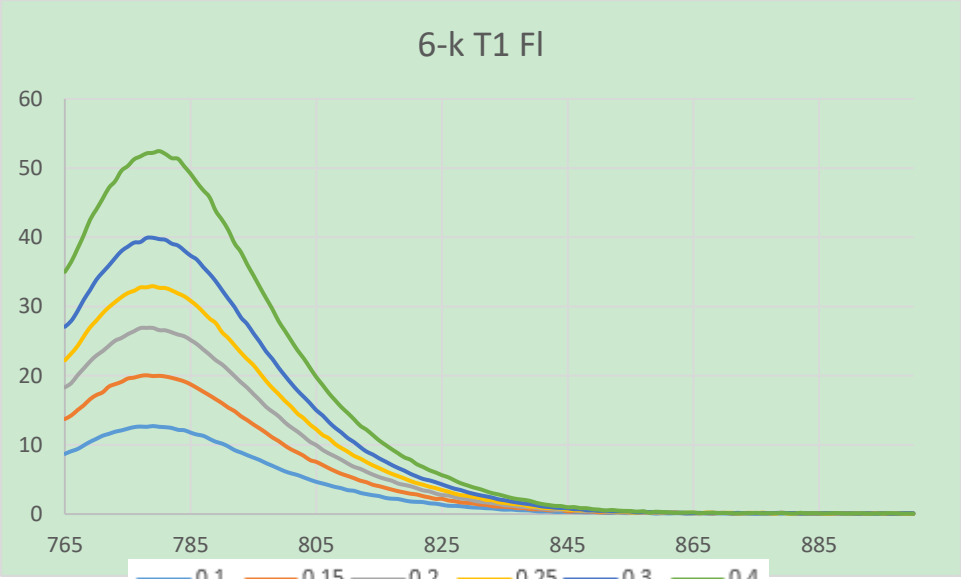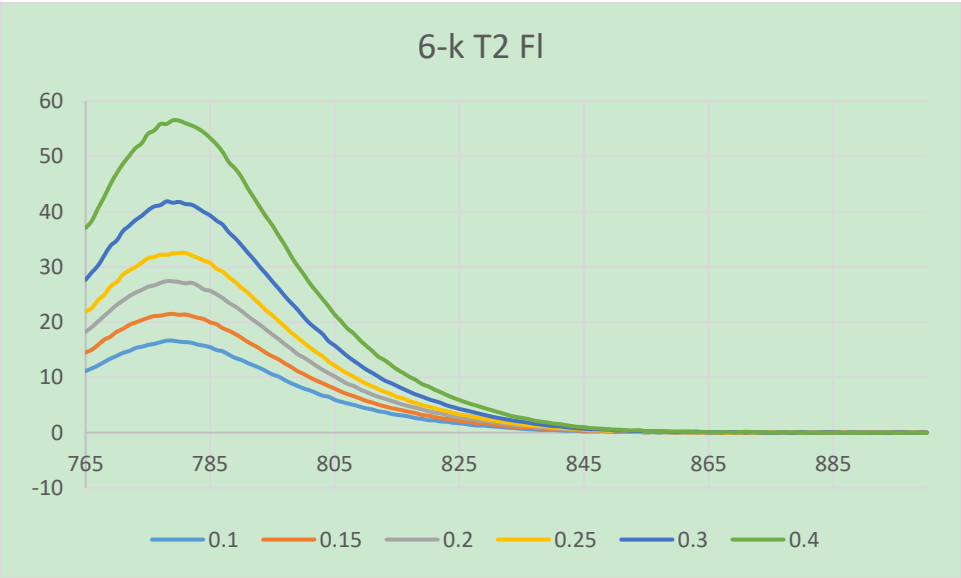

$y = 127381x - 0.0039$   
 $R^2 = 0.9971$

6-I T1 ABS

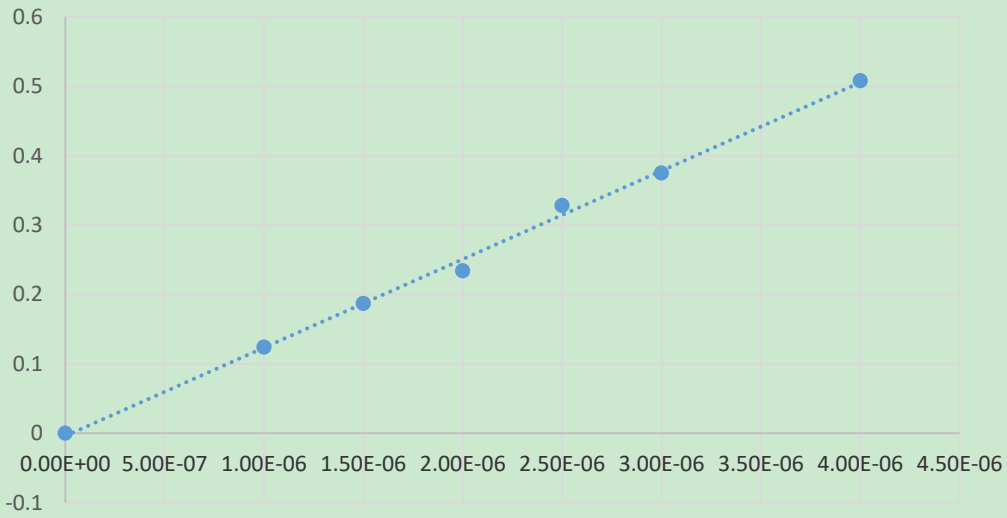

$y = 119381x - 0.0195$   
 $R^2 = 0.9909$

6-I T2 ABS

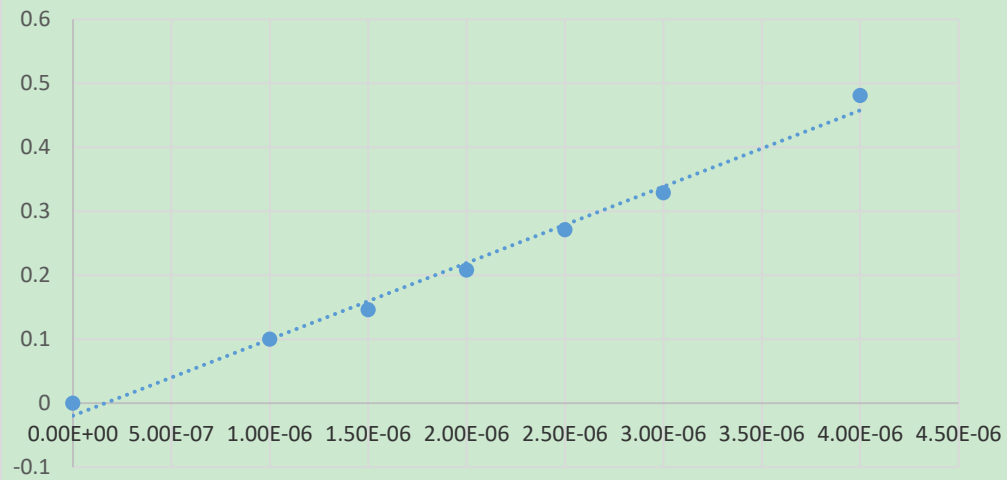

6-I T1 ABS

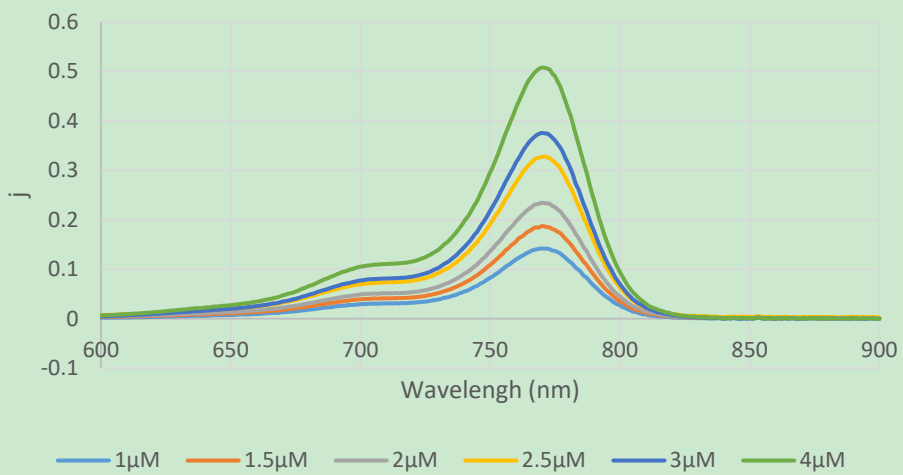

6-I T2 ABS

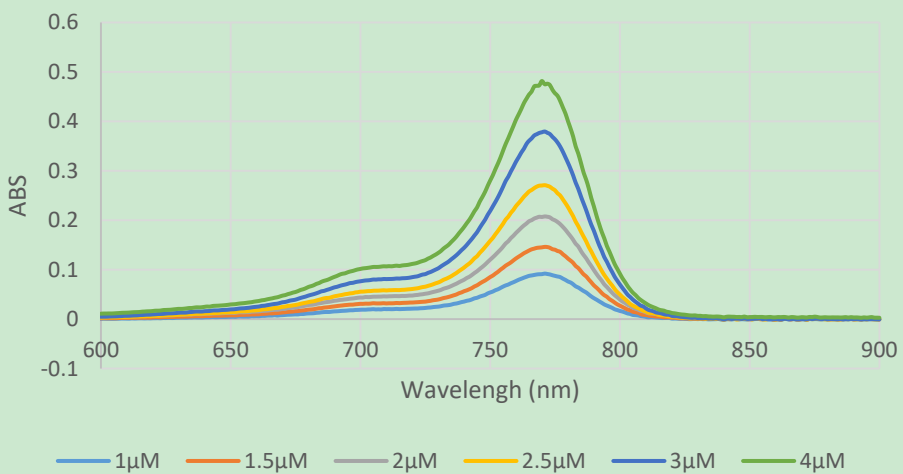

$y = 37939x + 285.28$   
 $R^2 = 0.9987$

6-I T1 FL

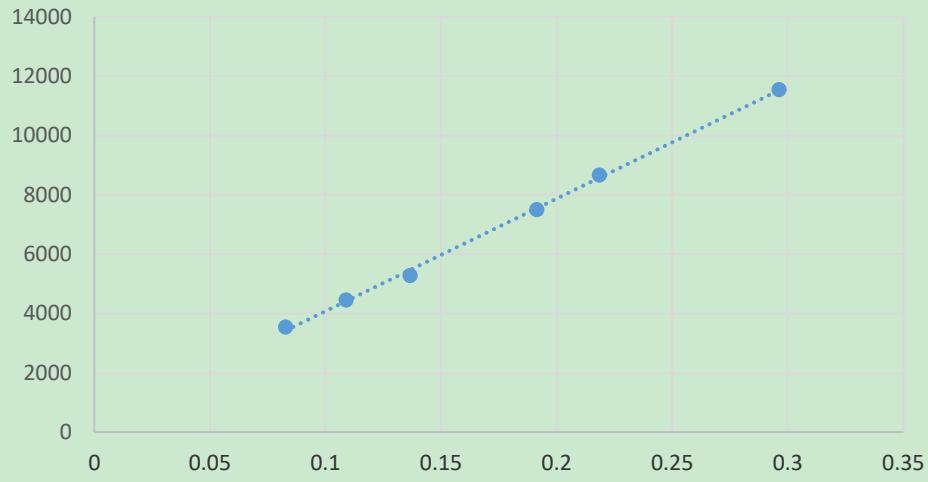

$y = 37870x + 1649.4$   
 $R^2 = 0.9893$

6-I T2 FL

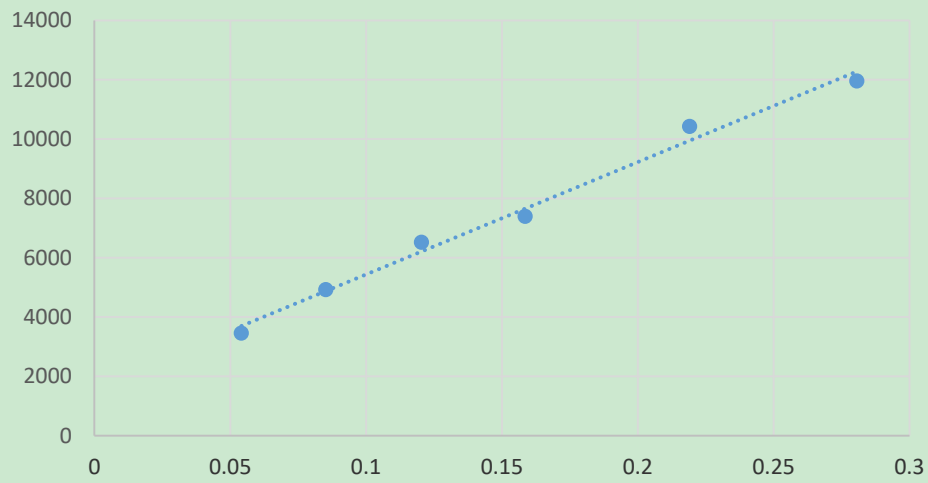



6-I T1 FL

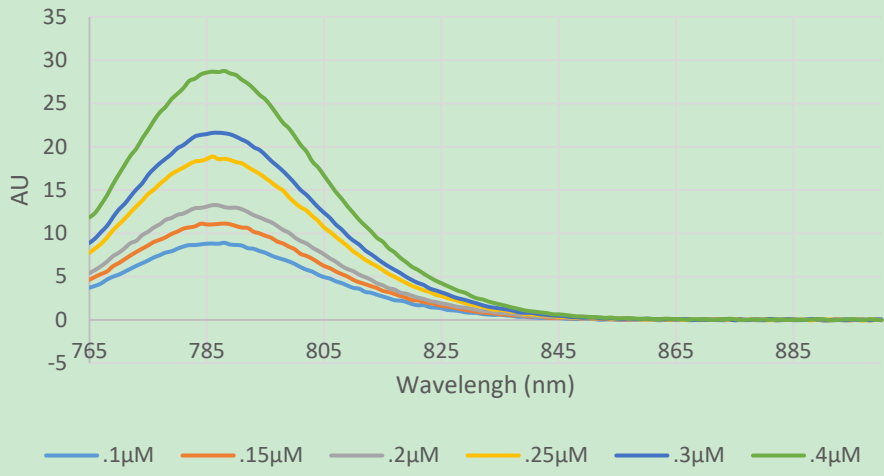

6-I T2 FL

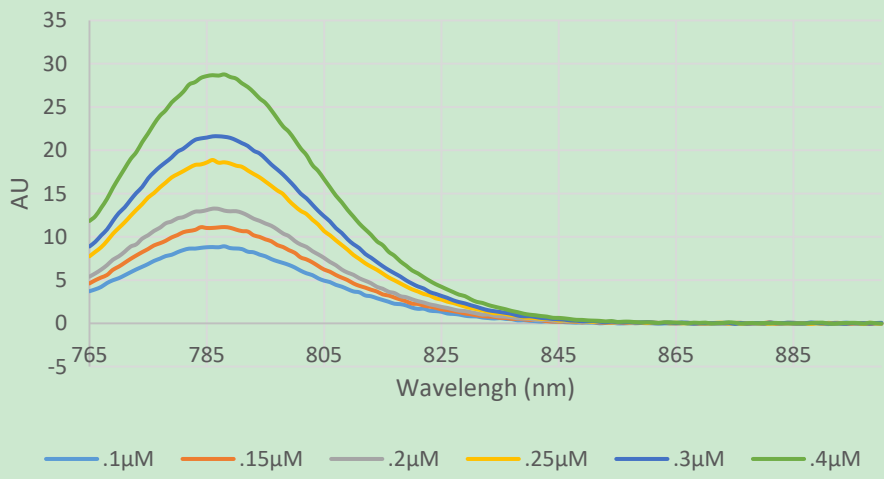

$y = 239810x - 0.0205$   
 $R^2 = 0.9961$

6-m T1 ABS

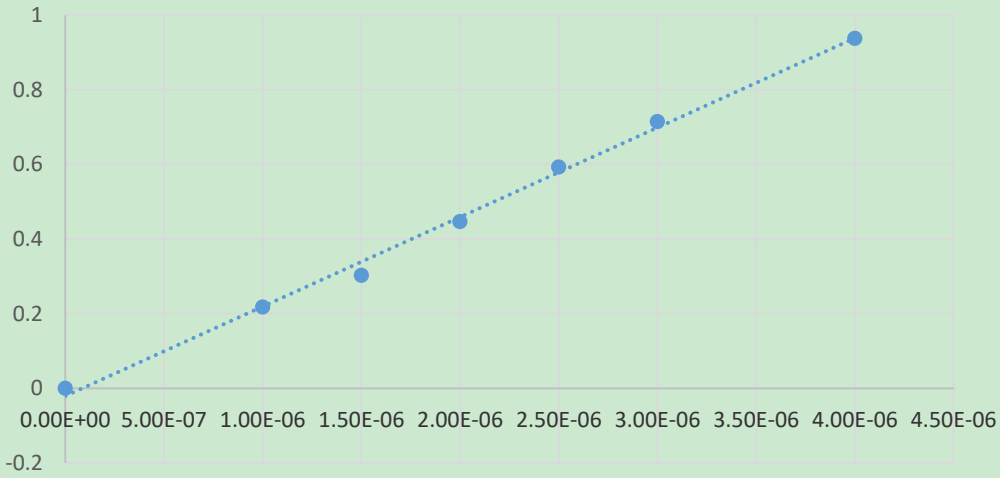

$y = 238619x - 0.0027$   
 $R^2 = 0.999$

6-m T2 ABS

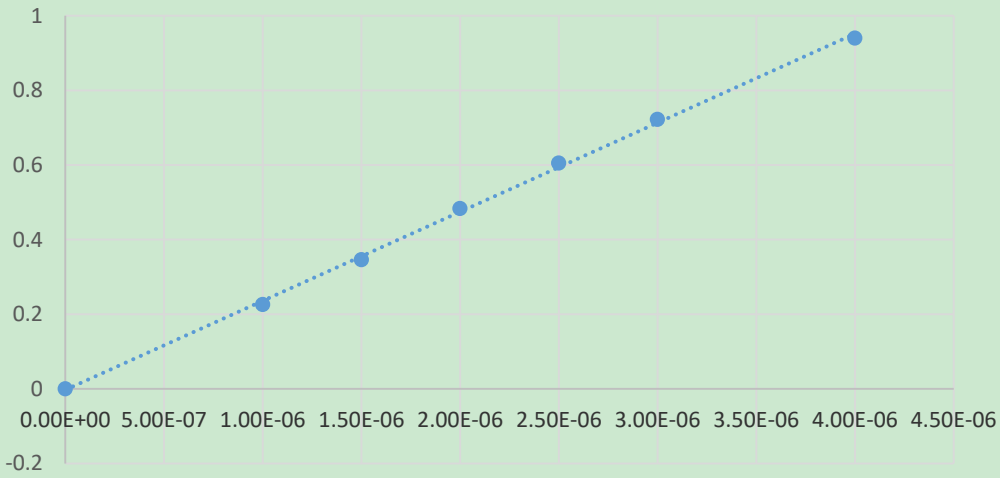

6-m T1 ABS

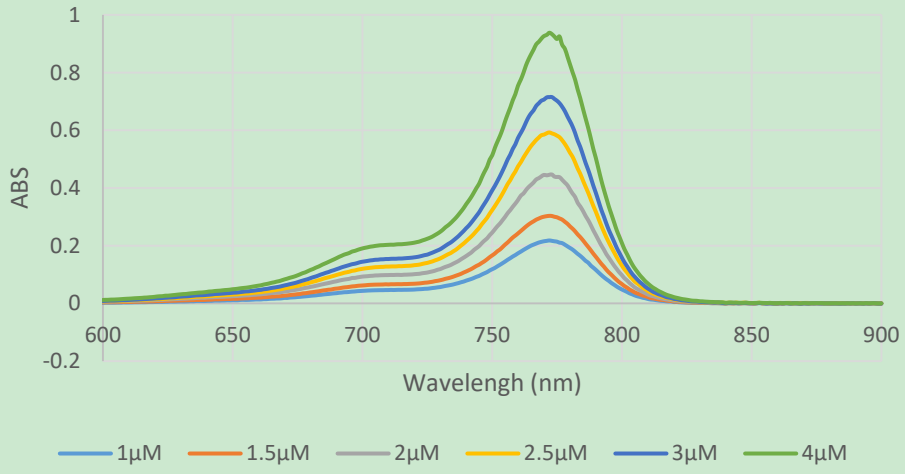

6-m T2 ABS

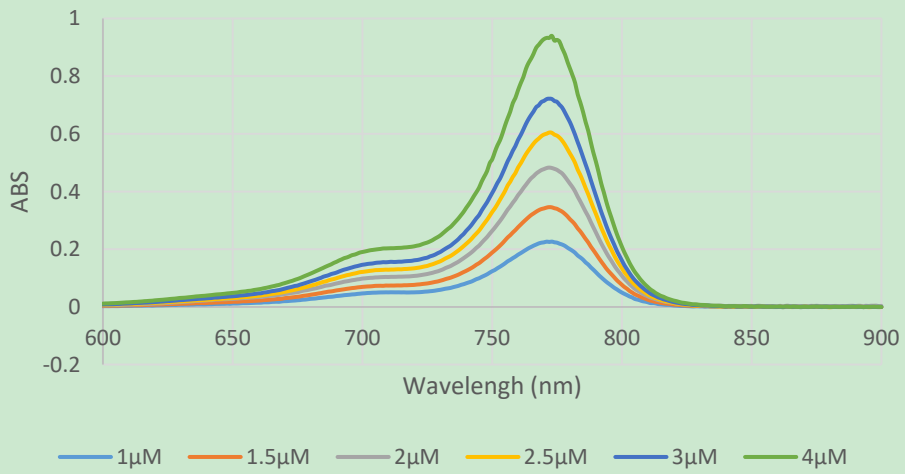

$y = 36806x + 877.1$   
 $R^2 = 0.9929$

6-m T1 FI

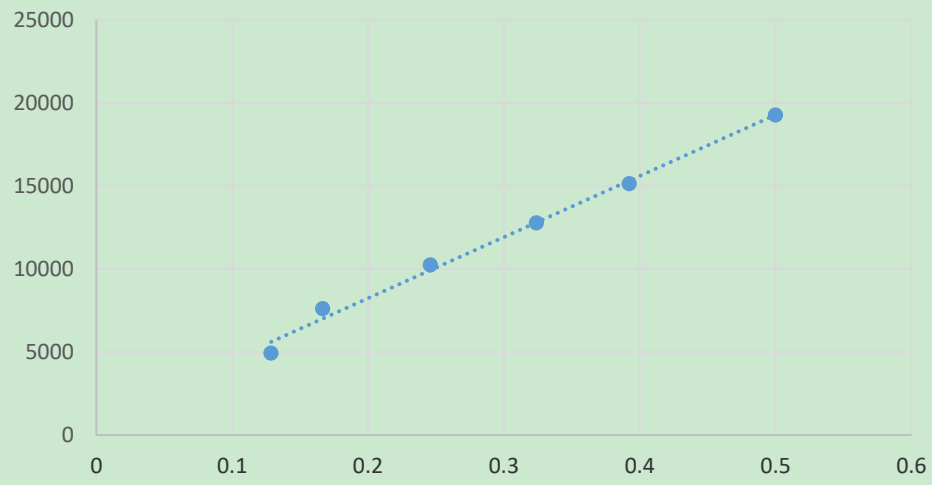

$y = 37767x + 447.91$   
 $R^2 = 0.9961$

6-m T2 FL

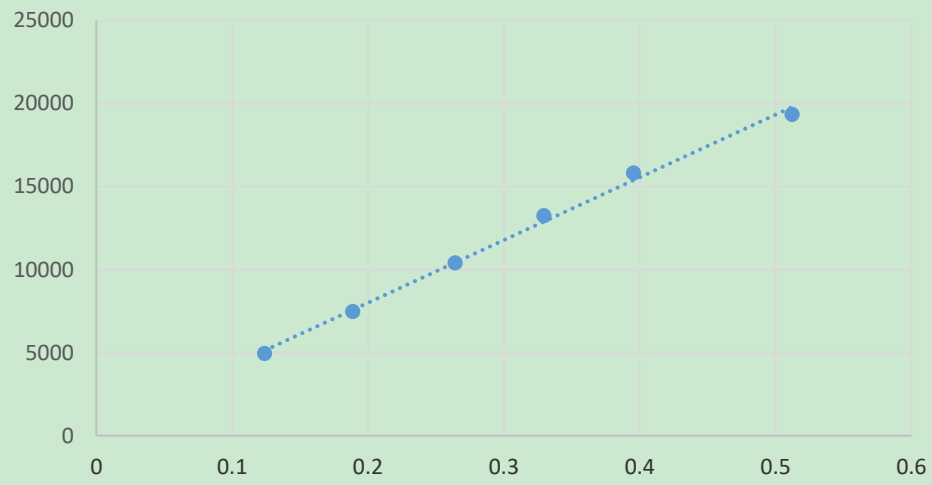

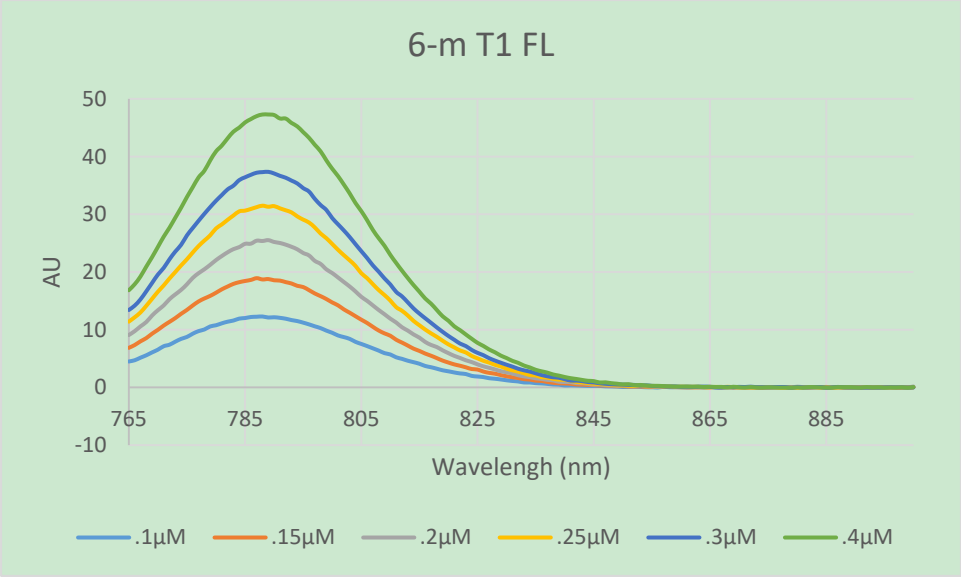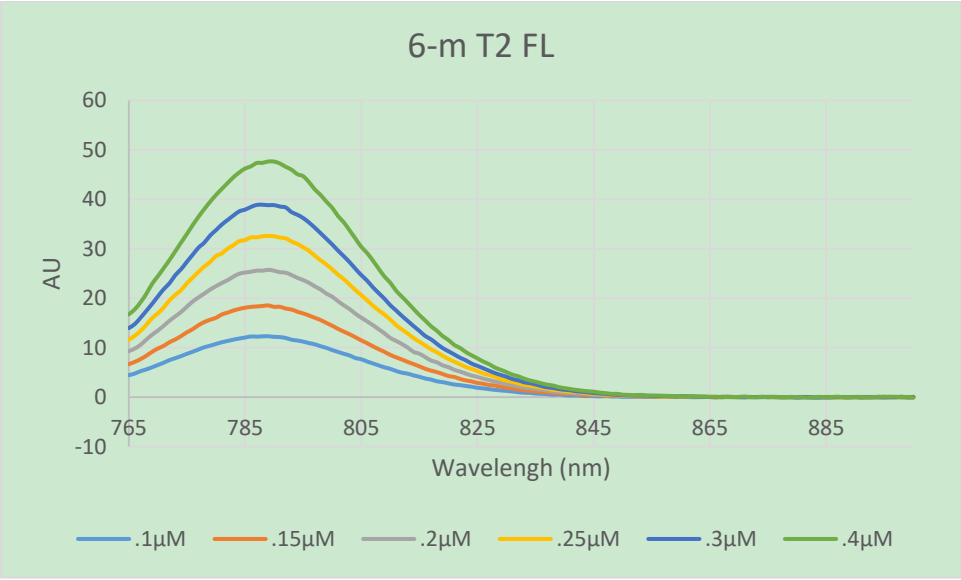

$y = 246657x - 0.0134$   
 $R^2 = 0.996$

### 6-nT1 ABS

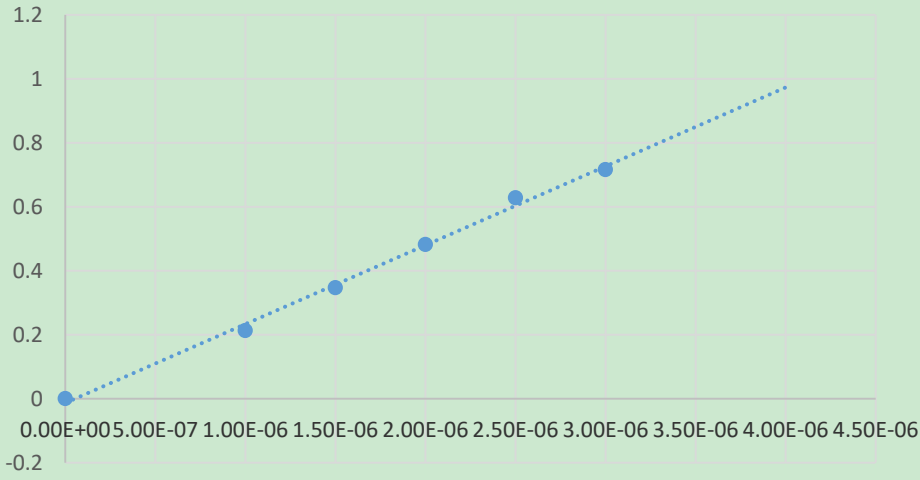

$y = 253086x - 0.0256$   
 $R^2 = 0.9947$

### 6-nT2 ABS

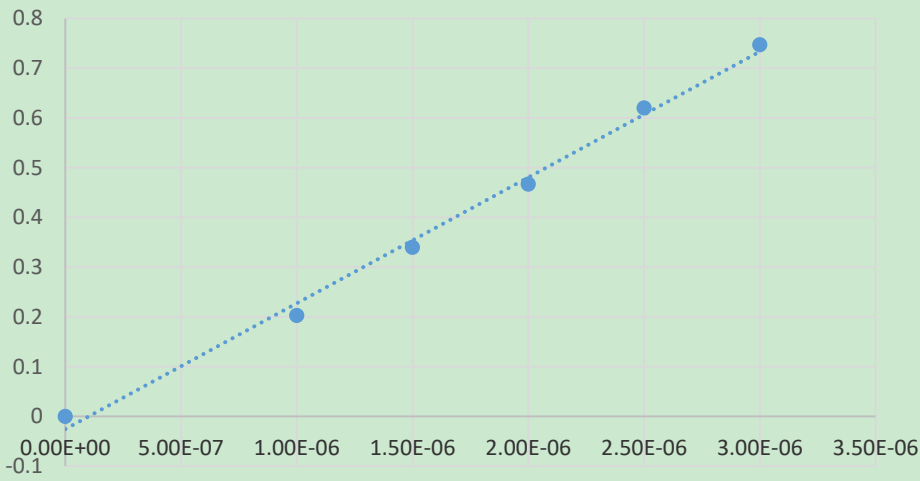

6-nT1 ABS

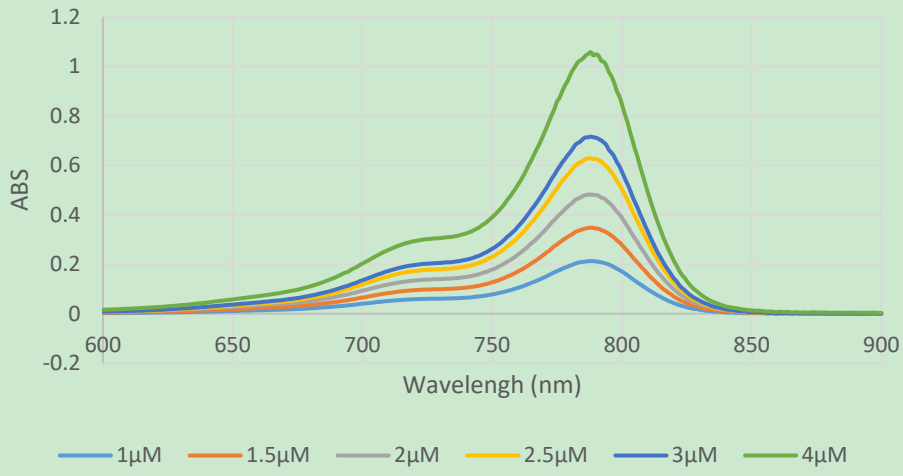

6-nT2 ABS

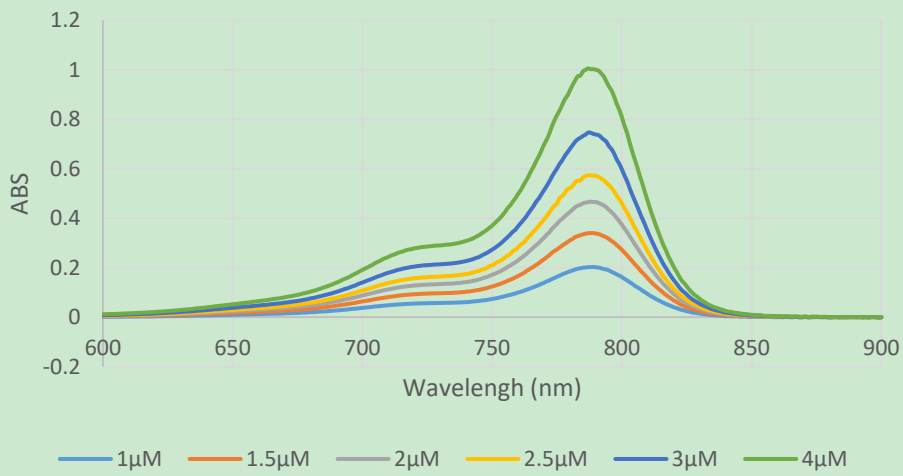

$y = 8449.2x + 62.987$   
 $R^2 = 0.9943$

6-nT1 FL

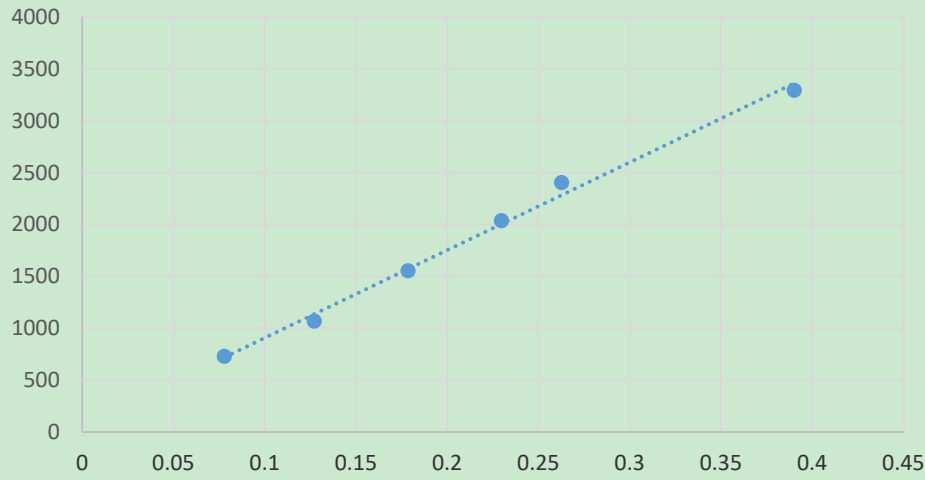

$y = 8592.7x + 69.994$   
 $R^2 = 0.9981$

6-nT2 FL

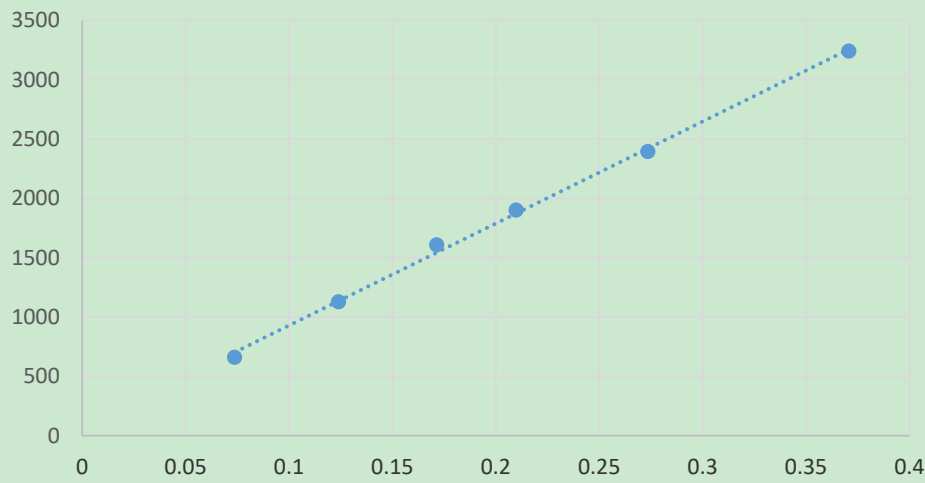



6-NT1 FL

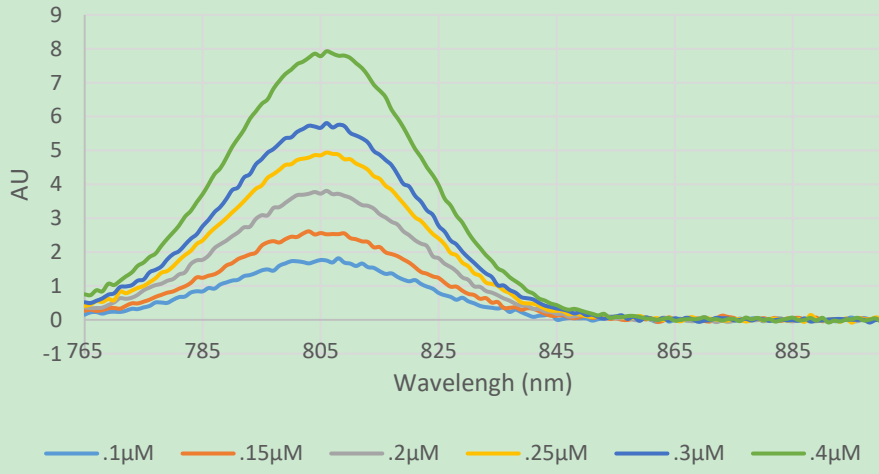

6-NT2 FL

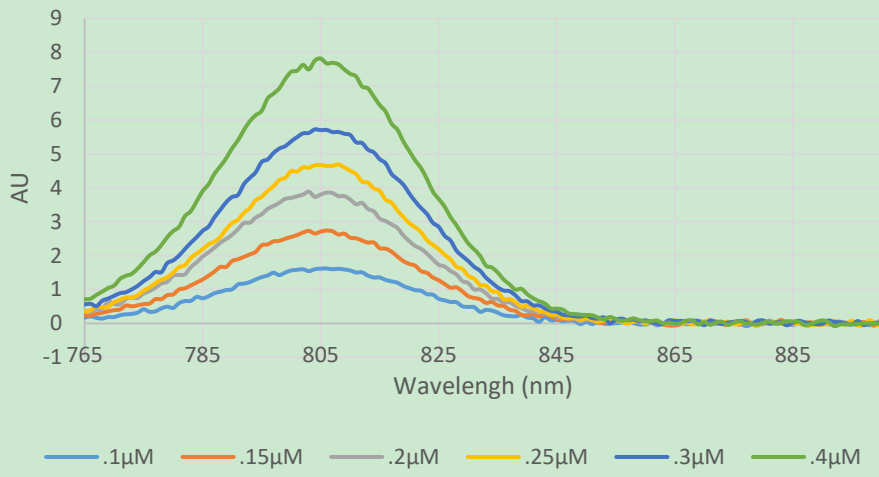

$y = 230048x - 0.0142$   
 $R^2 = 0.9981$

### 6-oT1 ABS

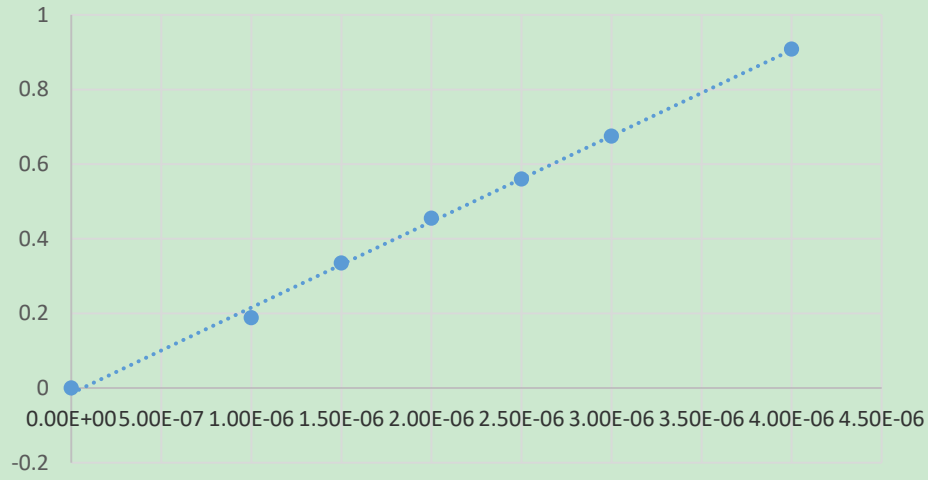

$y = 223238x - 0.0235$   
 $R^2 = 0.9952$

### 6-oT2 ABS

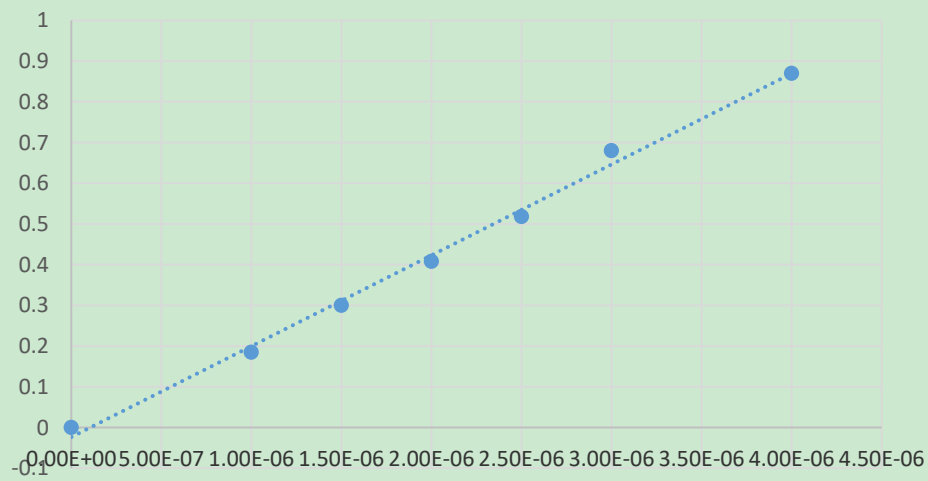

### 6-oT1 ABS

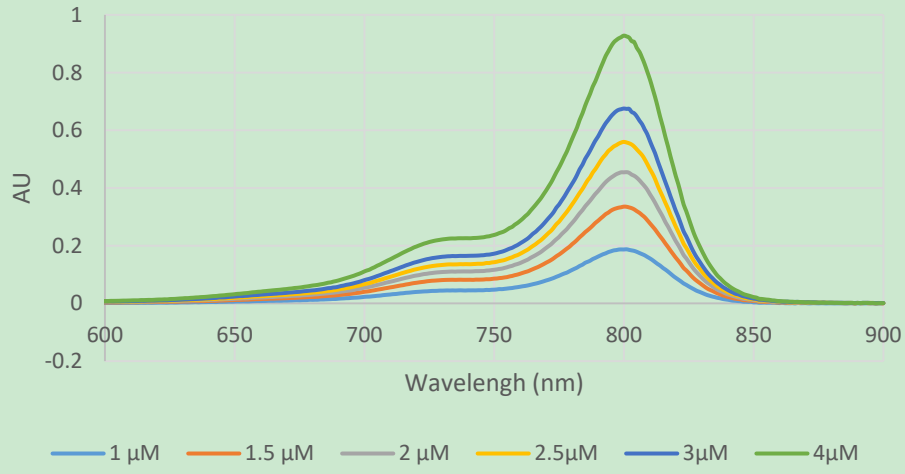

### 6-oT2 ABS

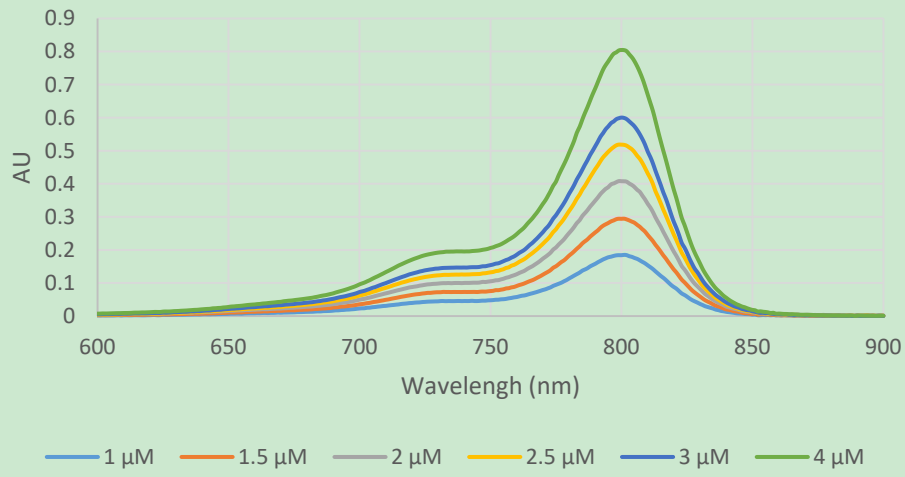

$y = 11029x + 90.3$   
 $R^2 = 0.997$

6-oT1FL

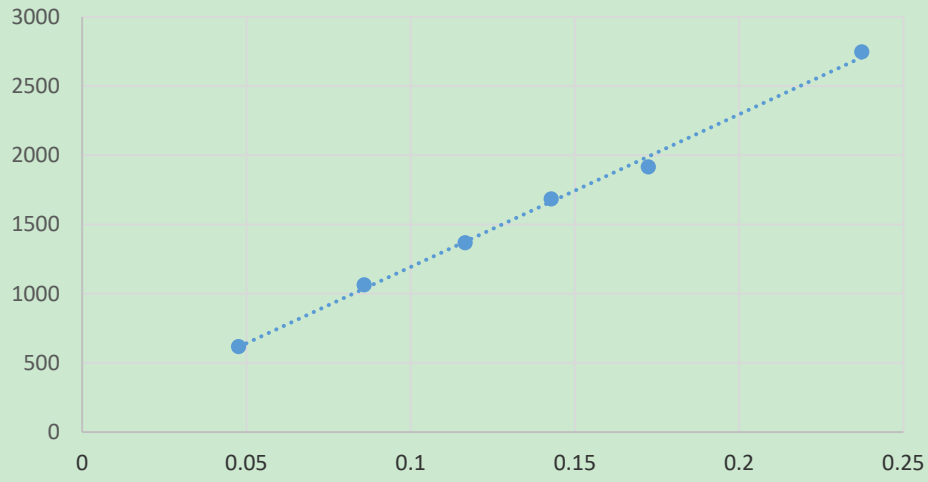

$y = 10908x + 133.91$   
 $R^2 = 0.997$

6-oT2FL

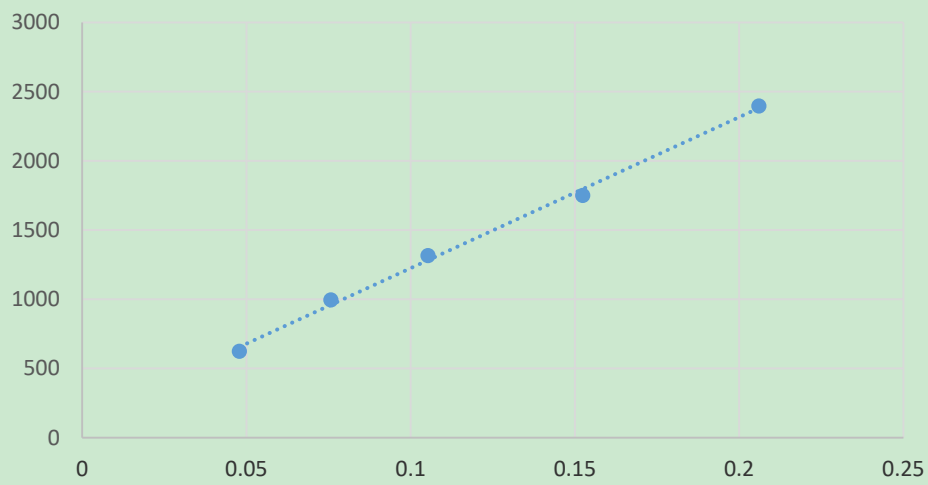

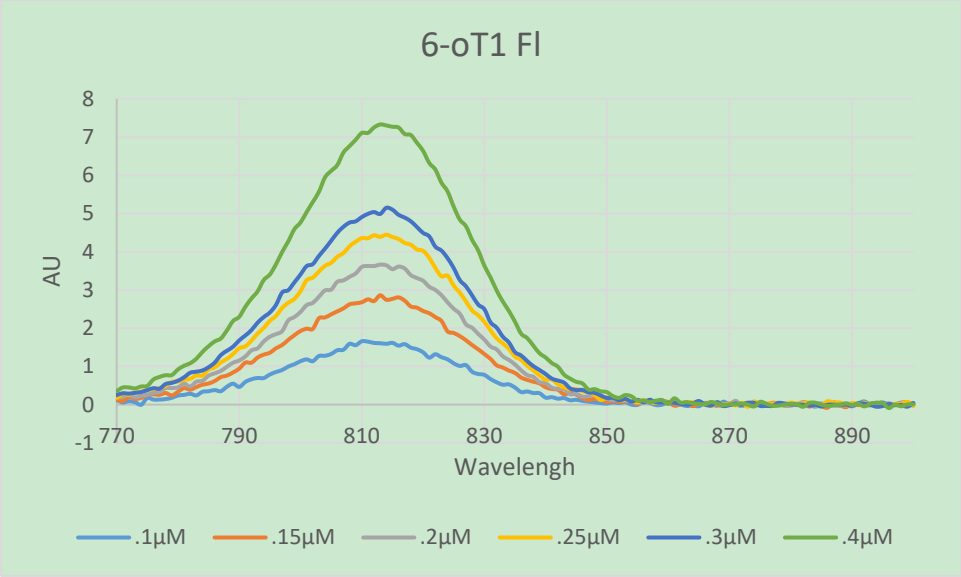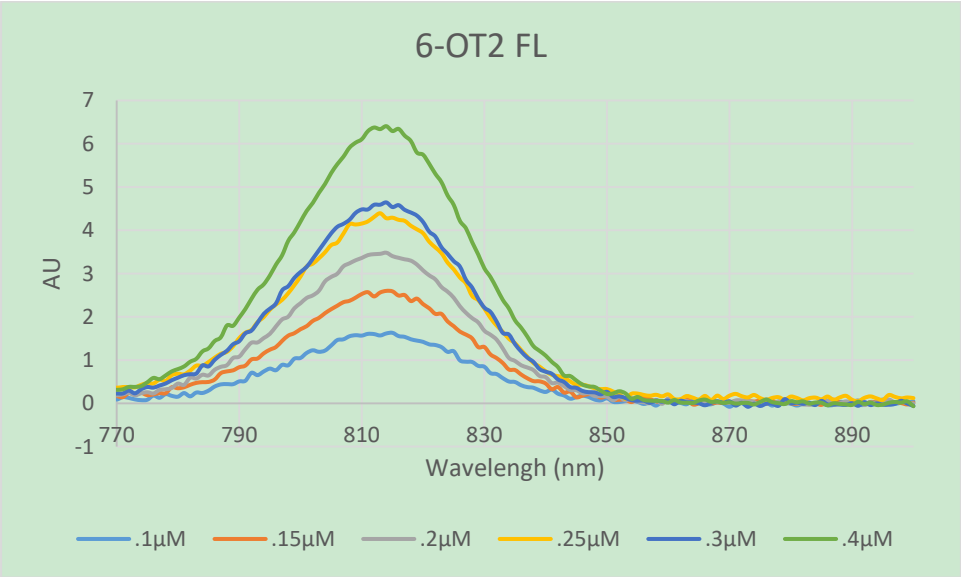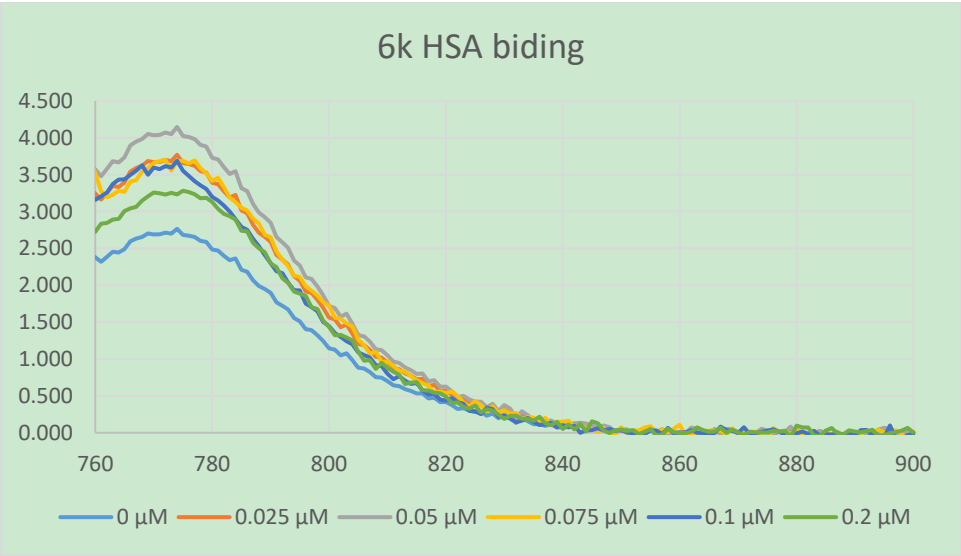

ANDY\_AC\_167\_ESIPOS\_HENARY\_032917 #129-138 RT: 1.82-1.95 AV: 10 NL: 2.13E8  
T: FTMS + p ESI Full ms [100.00-1000.00]

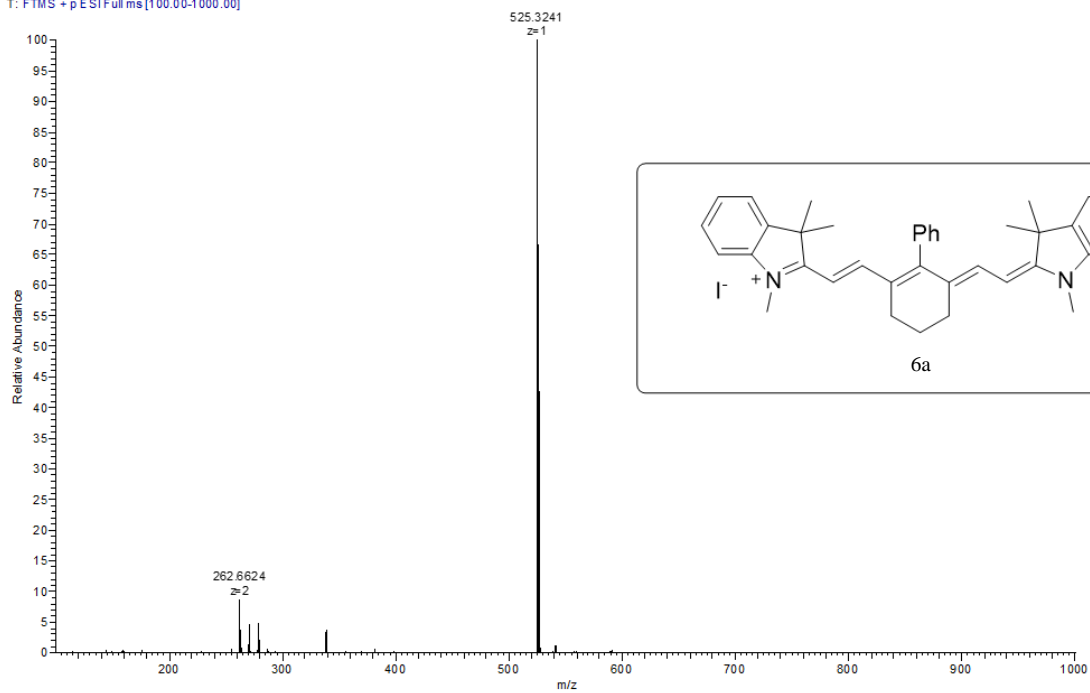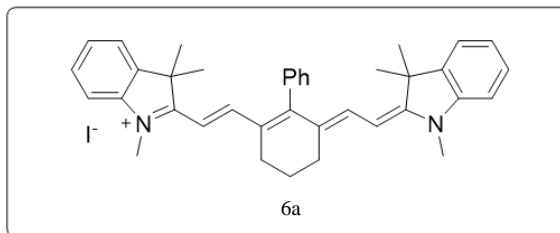

FM\_AL188CLM\_e\_ESIPOS\_HENARY\_121417#144-147 RT: 2.05-2.09 AV: 4 NL: 3.64E7  
T: FTMS + p ESI Full ms [50.00-1000.00]

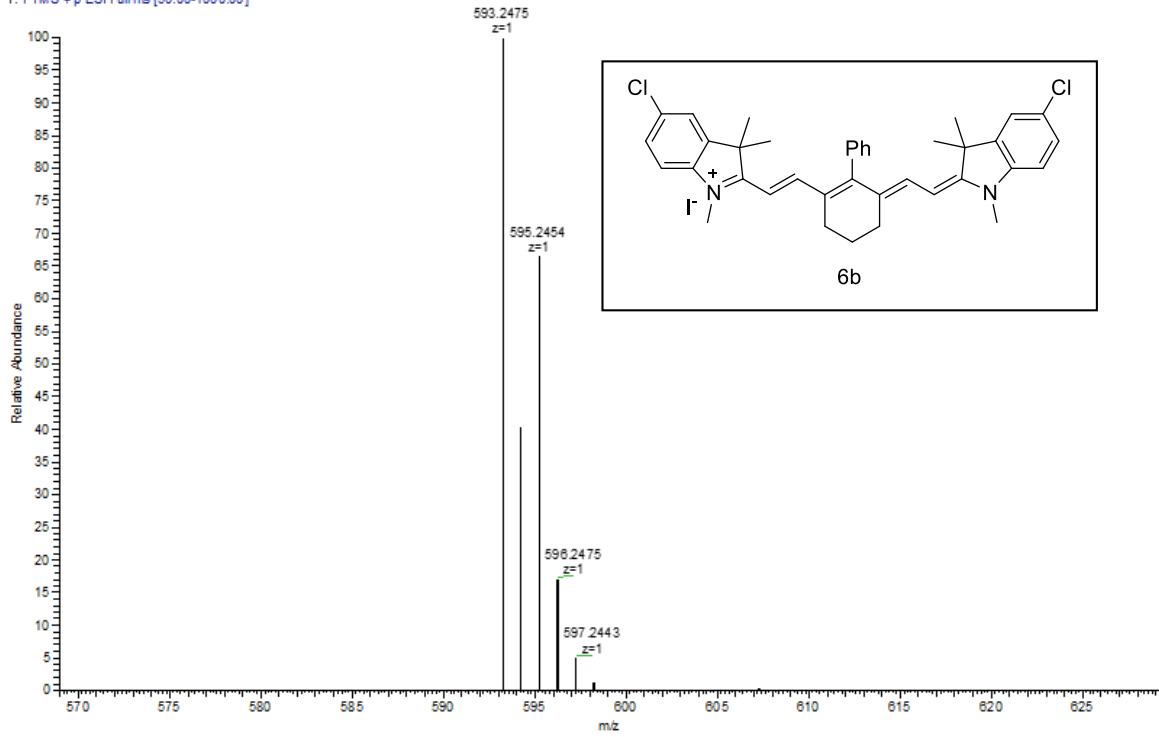

FM\_AL1818M\_e\_ESIPOS\_HENARY\_121417#145-147 RT: 2.06-2.09 AV: 3 NL: 2.82E7  
T: FTMS + p ESI Full ms [50.00-1000.00]

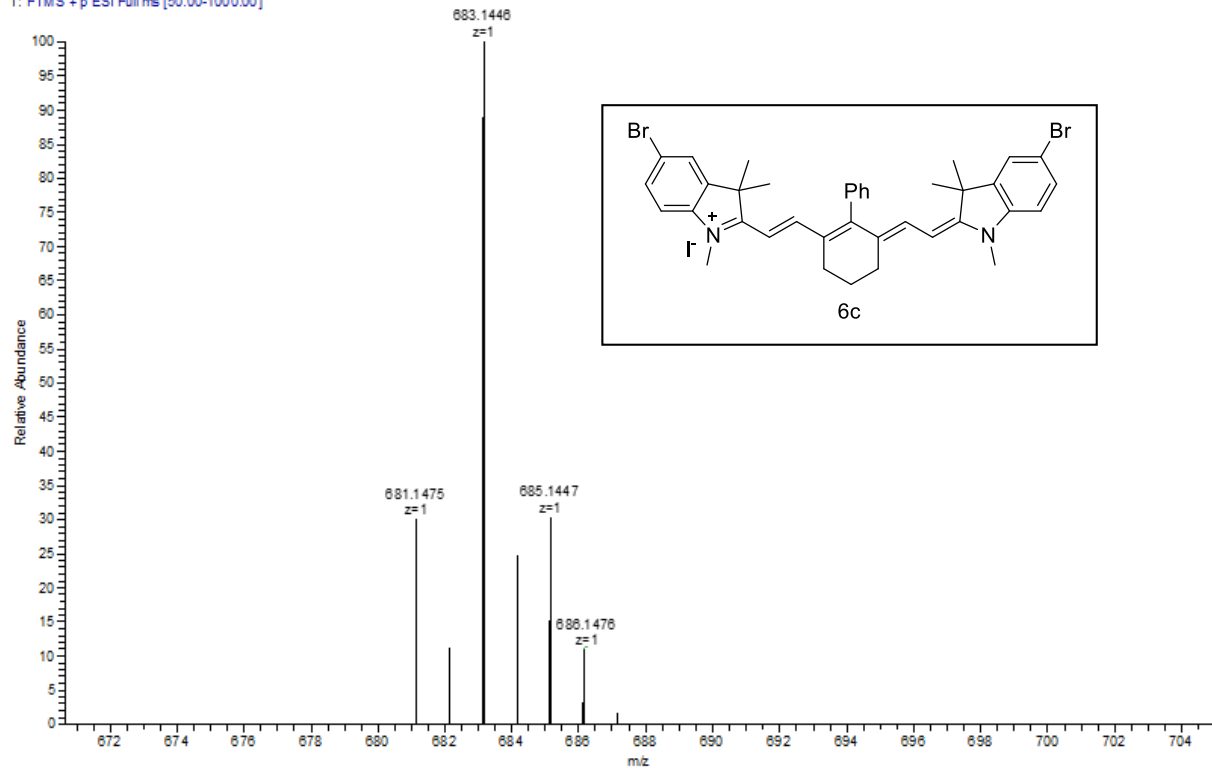

FM\_AL190MeOMe\_ESIPOS\_HENARY\_121417 #146-151 RT: 2.08-2.14 AV: 6 NL: 2.46E8  
T: FTMS + p ESI Full ms [50.00-1000.00]

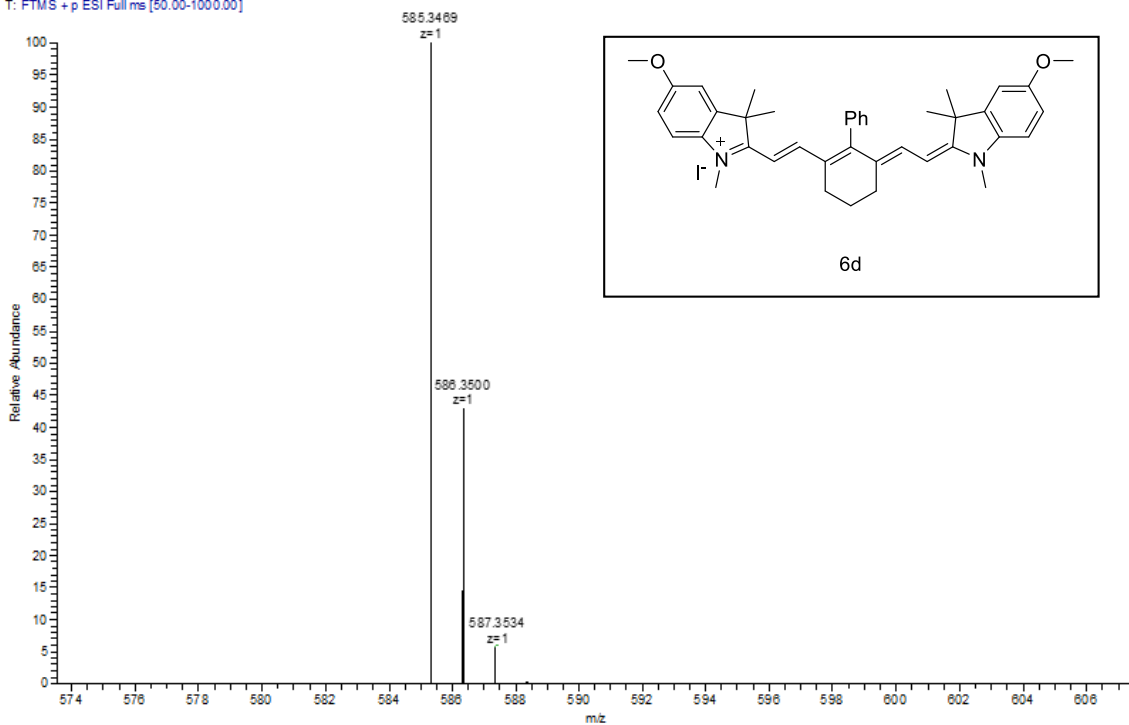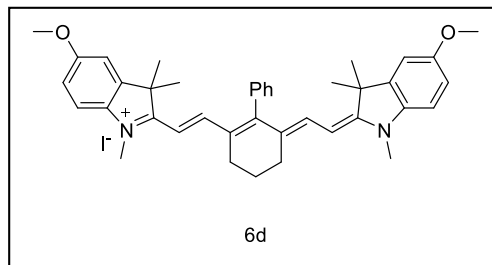

FM\_AL184BEMe\_ESIPOS\_HENARY\_121417 #145-150 RT: 2.06-2.13 AV: 6 NL: 1.32E8  
T: FTMS + p ESI Full ms [50.00-1000.00]

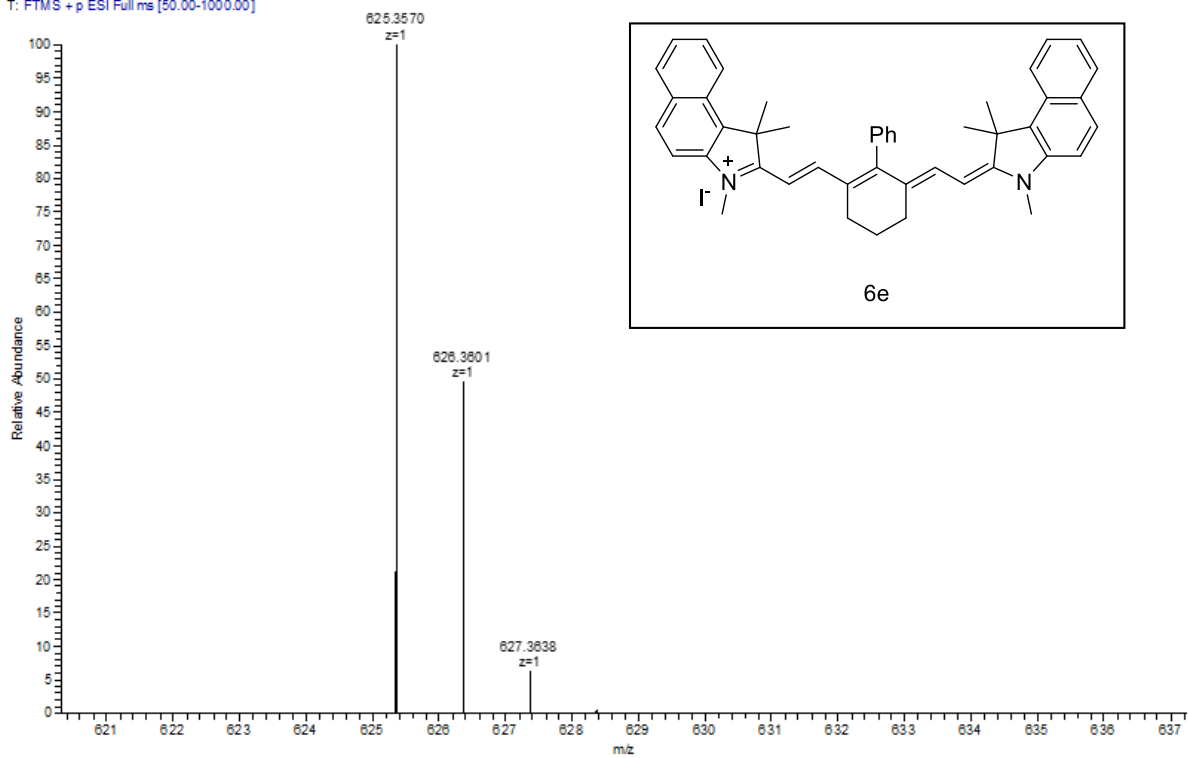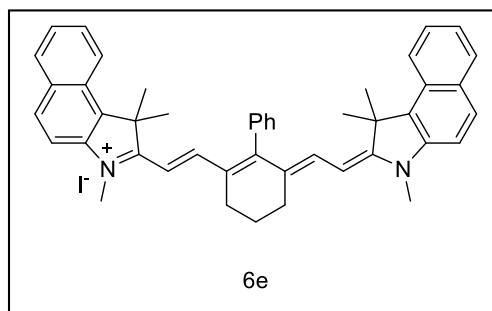



FM\_AL5HET\_ESIPOS\_HENARY\_121417 #147-150 RT: 2.09-2.13 AV: 4 NL: 4.27E8  
T: FTMS + p ESI Full ms [50.00-1000.00]

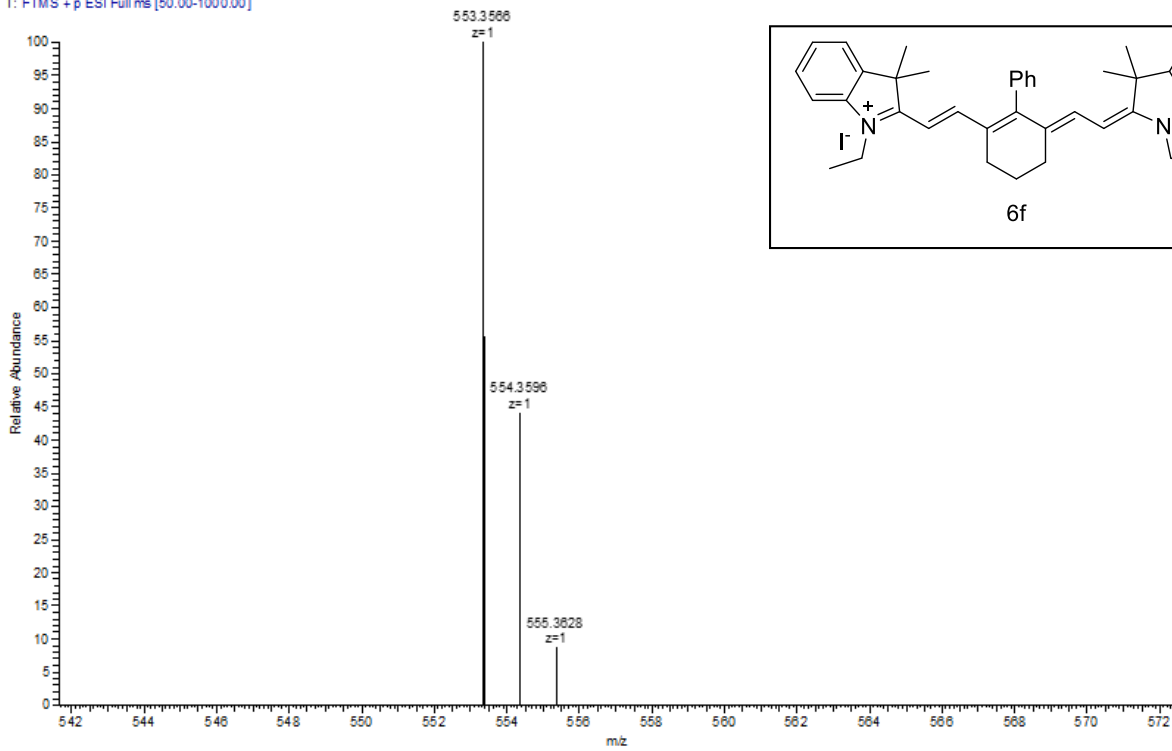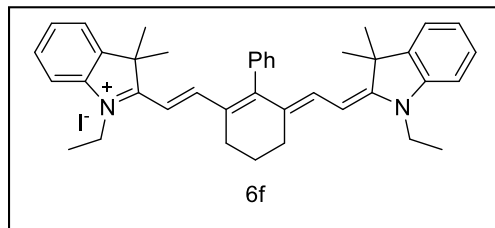

FM\_AL7CLET\_ESIPOS\_HENARY\_121417 #142-146 RT: 2.02-2.07 AV: 5 NL: 4.69E7  
T: FTMS + p ESI Full ms [50.00-1000.00]

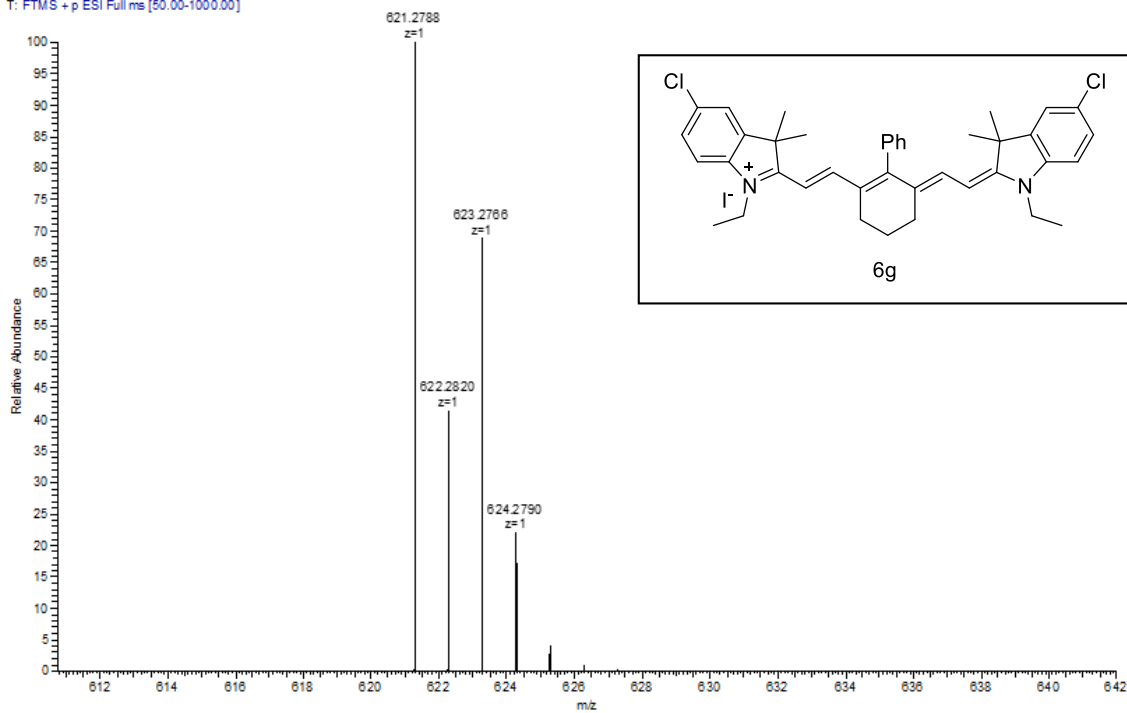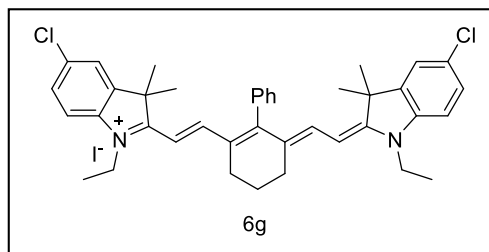

FM\_AL4BrET\_ESIPOS\_HENARY\_121417 #145-148 RT: 2.06-2.10 AV: 4 NL: 424E7  
T: FTMS + p ESI Full ms [50.00-1000.00]

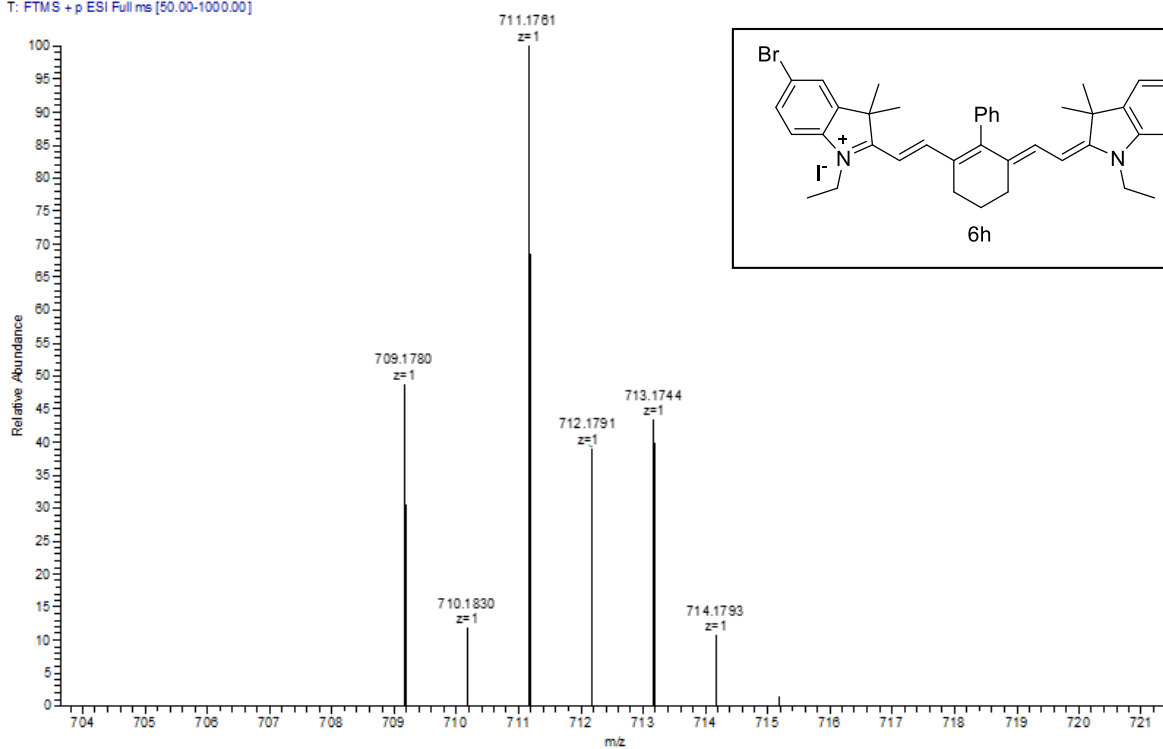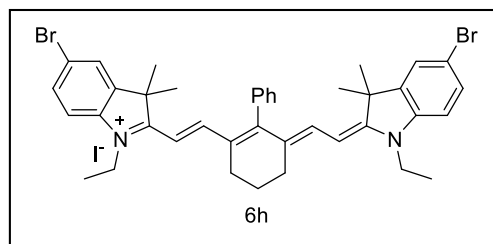

FM\_AL8MeOET\_ESIPOS\_HENARY\_121417 #139-146 RT: 1.97-2.07 AV: 8 NL: 1.84E8  
T: FTMS + p ESI Full ms [50.00-1000.00]

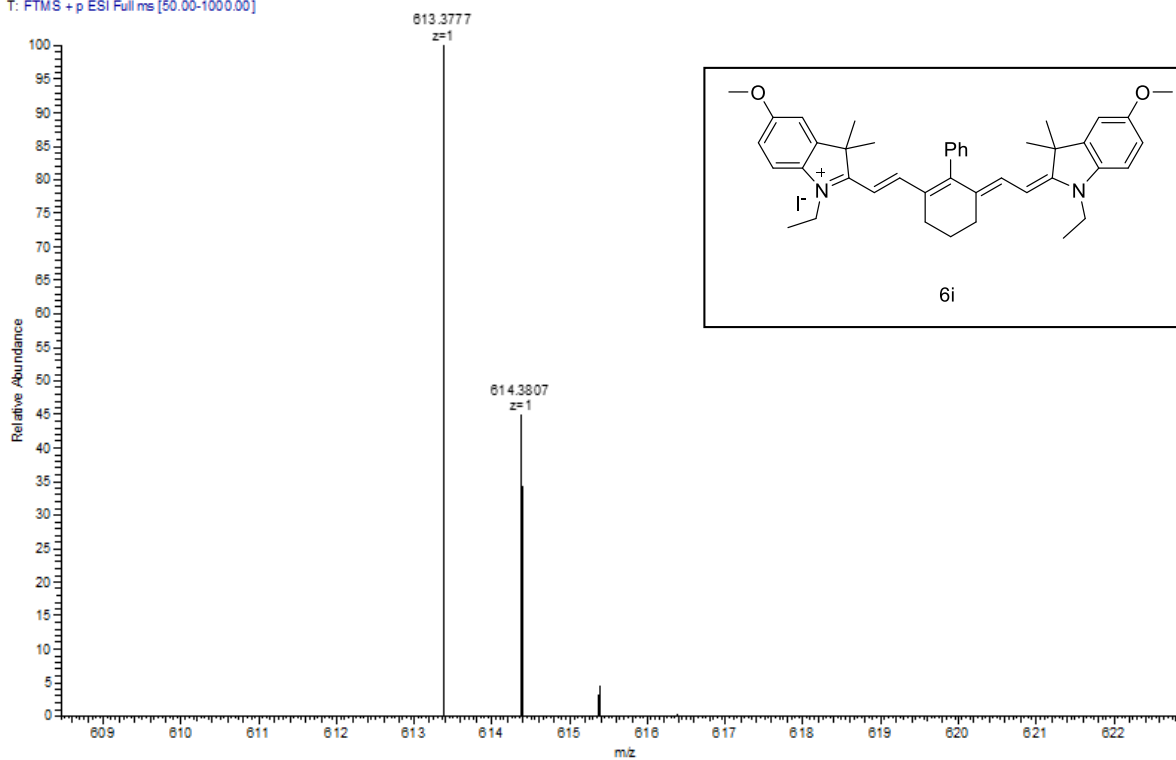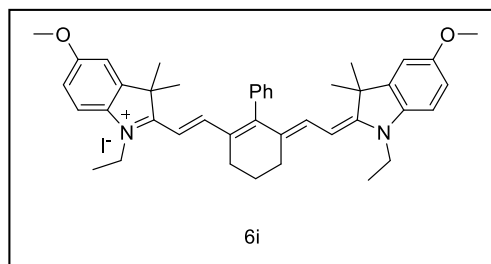

FM\_AL8BEET\_ESIPOS\_HENARY\_121417 #147-150 RT: 2.09-2.13 AV: 4 NL: 8.98E7  
T: FTMS + p ESI Full ms [50.00-1000.00]

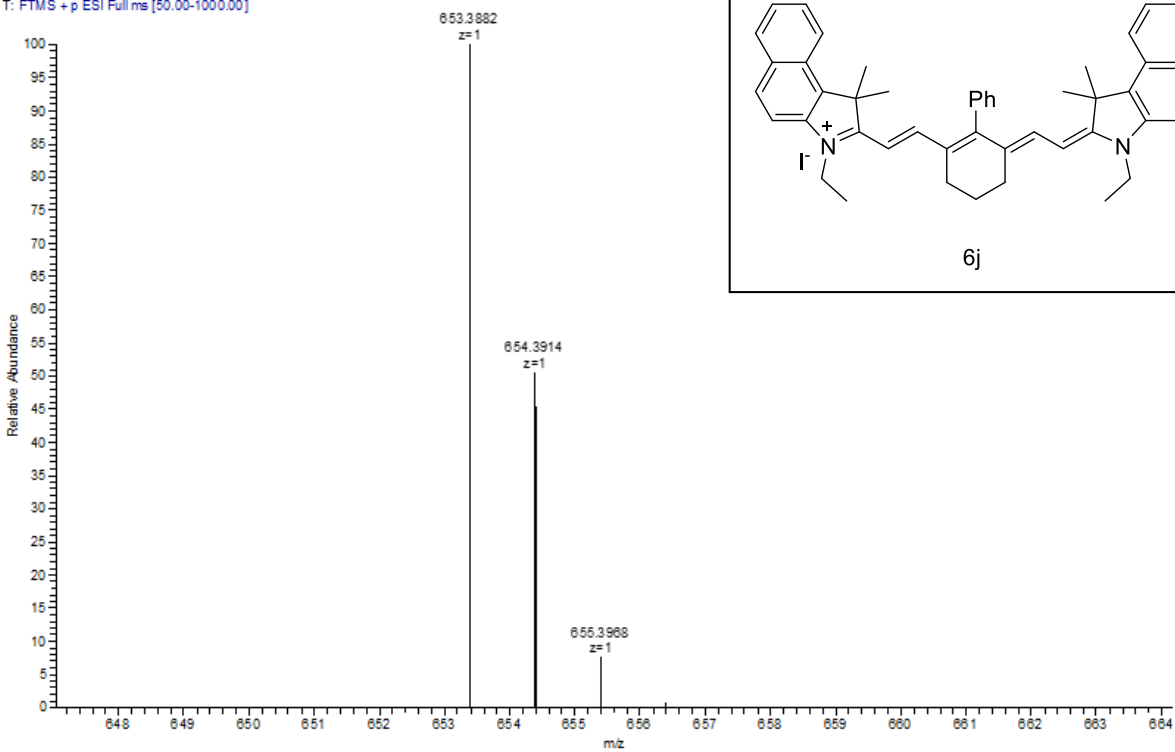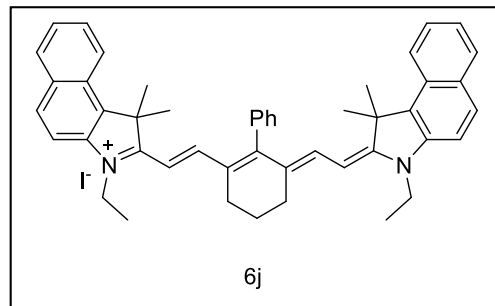

FM\_FM8HBu\_ESIPOS\_HENARY\_121417 #152-156 RT: 2.16-2.21 AV: 5 NL: 1.13E8  
T: FTMS + p ESI Full ms [50.00-1000.00]

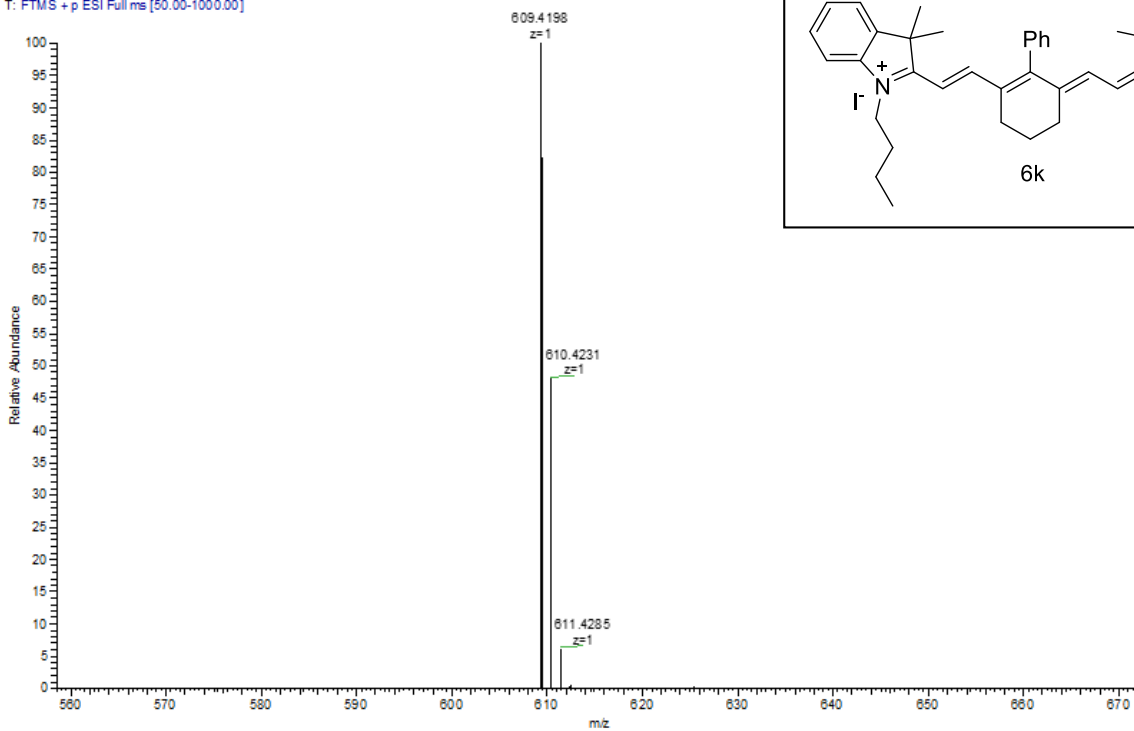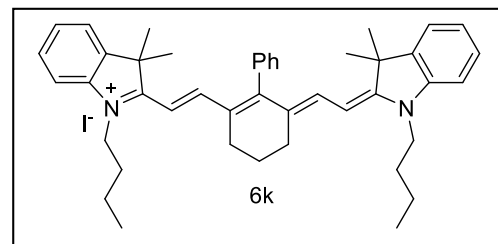

FM\_FM11C1Bu\_ESIPOS\_HENARY\_121417#175-179 RT: 2.49-2.55 AV: 5 NL: 1.53E7  
T: FTMS +p ESI Full ms [50.00-1000.00]

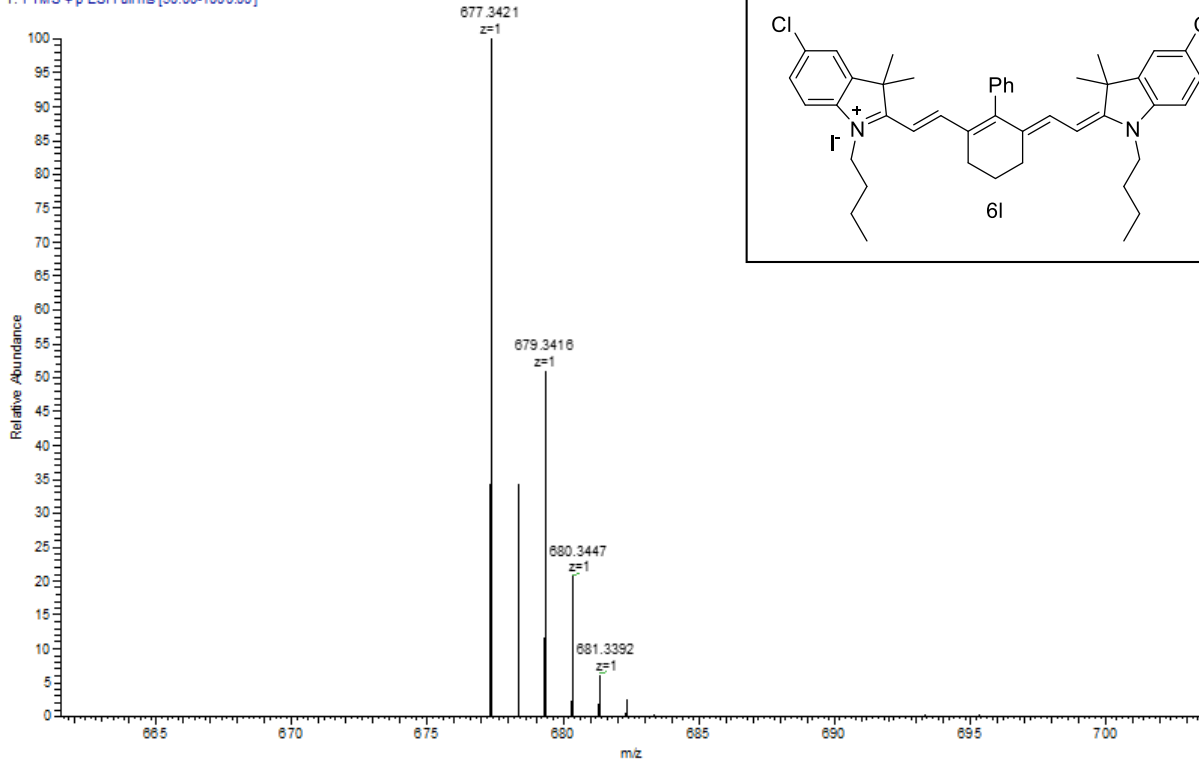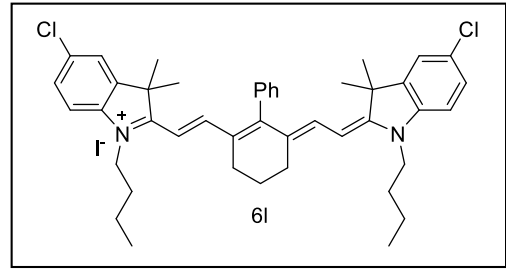

FM\_5BrBu\_ESIPOS\_HENARY\_121417#185-191 RT: 2.62-2.70 AV: 7 NL: 1.88E7  
T: FTMS +p ESI Full ms [50.00-1000.00]

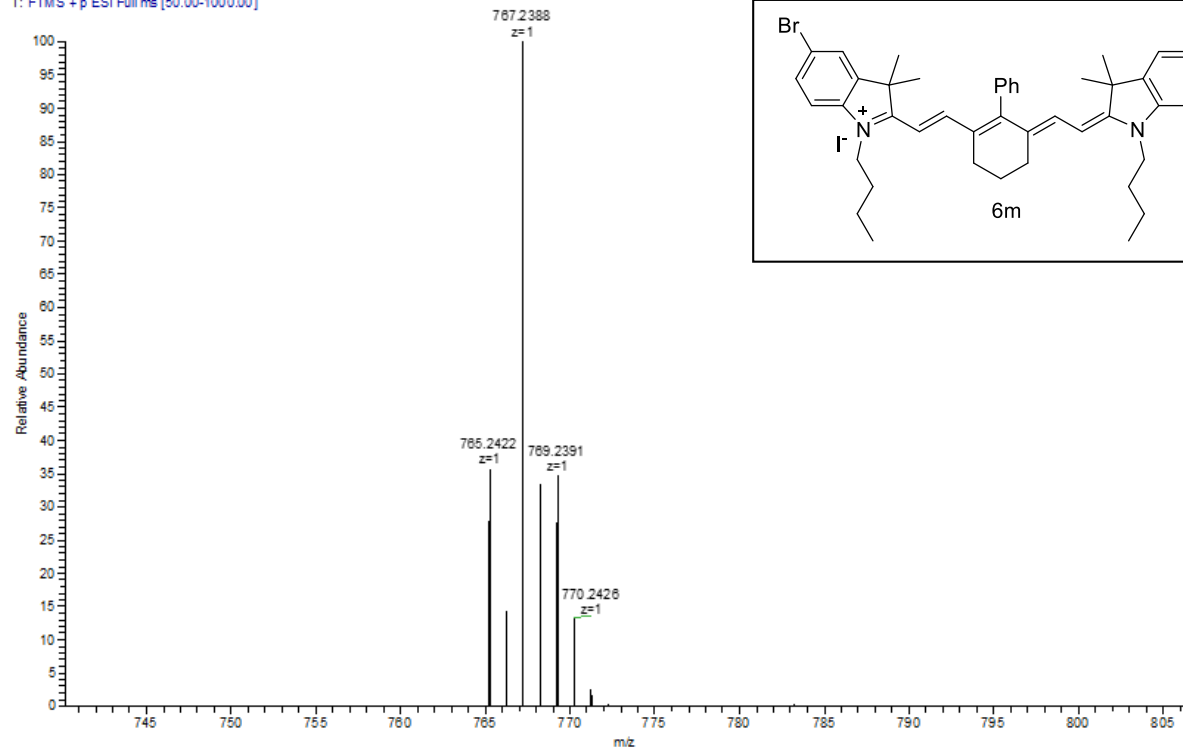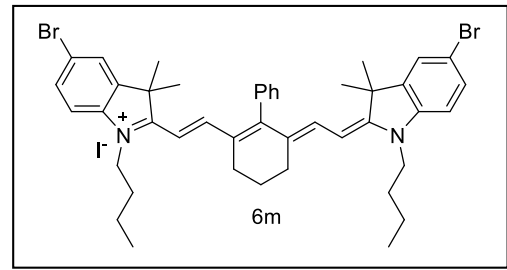

FM\_14MeOBu\_ESIPOS\_HENARY\_121417 #147-151 RT: 2.09-2.14 AV: 5 NL: 2.25E8  
T: FTMS + p ESI Full ms [50.00-1000.00]

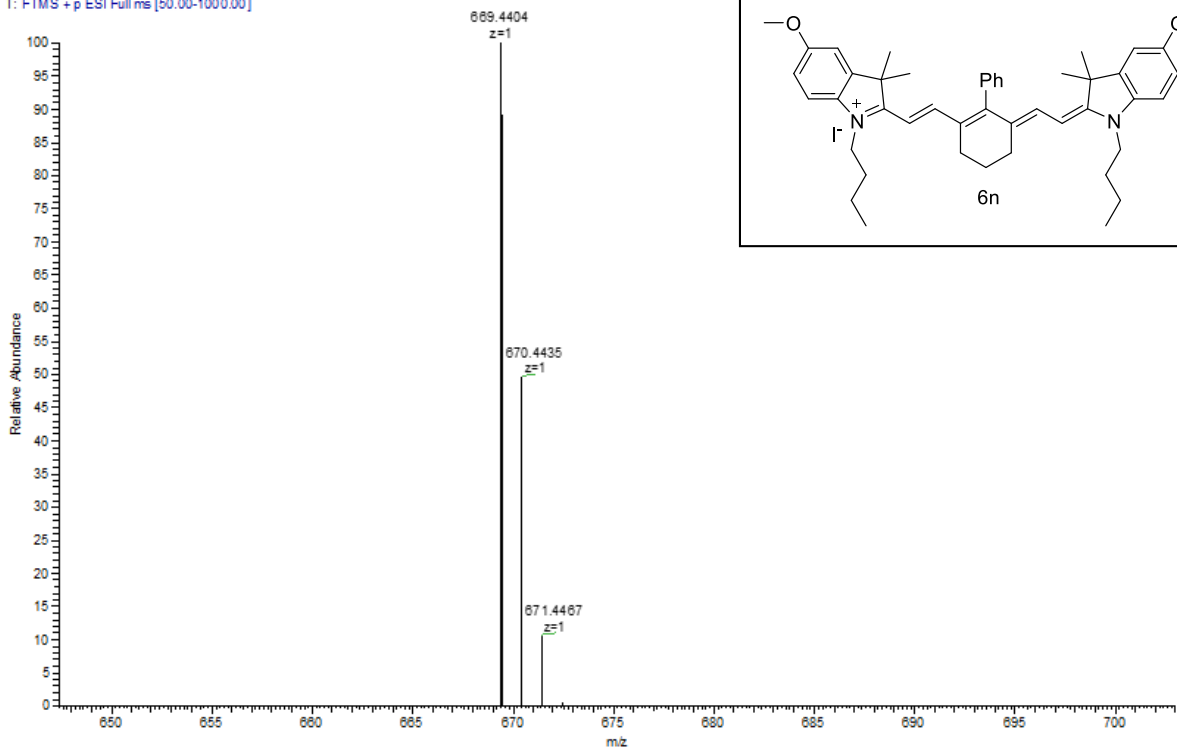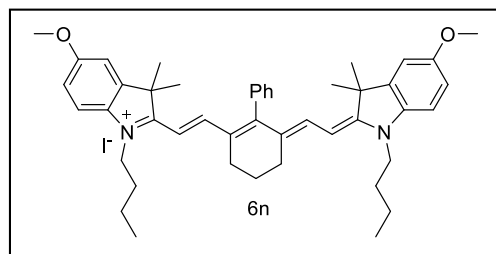

FM\_9BEbu\_ESIPOS\_HENARY\_121417 #142 RT: 2.02 AV: 1 NL: 1.23E7  
T: FTMS + p ESI Full ms [50.00-1000.00]

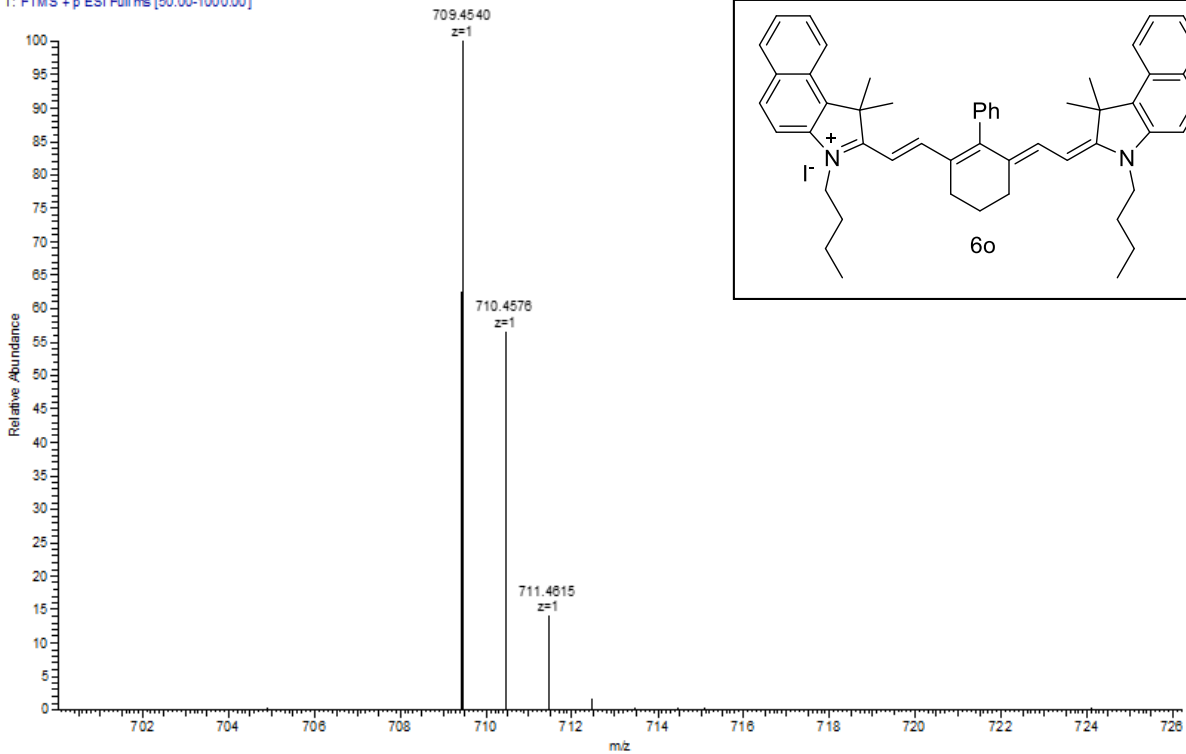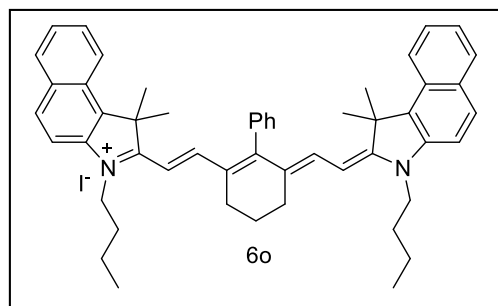

Supplement: molecules-23-00226-s001.pdf [file molecules-23-00226-s001.pdf]
